# Supplementary material for: Integrating amino acids into Bcr-Abl inhibitors: design, synthesis, biological evaluation, and in silico studies
Source: Royal Society of Chemistry journal article supplement (doi:10.1039/d4md00417e), 2024-01-01

## Supporting Information

### **Integrating amino acids into Bcr-Abl inhibitors: Design, synthesis, biological evaluation, and *in silico* studies**

Yuying Liu<sup>a,#</sup>, Zeyu Yang<sup>a,#</sup>, Jie Zhang<sup>a</sup>, Na Guo<sup>a</sup>, Nanxin Liu<sup>b</sup>, Qingqing Zhang<sup>a</sup>,  
Xintao Dang<sup>a</sup>, Yanchen Li<sup>a</sup>, Jie Zhang<sup>a</sup>, Xiaoyan Pan<sup>a,\*</sup>

<sup>a</sup> School of Pharmacy, Health Science Center, Xi'an Jiaotong University, Xi'an, 710061, China

<sup>b</sup> Center for Translational Medicine, the First Affiliated Hospital of Xi'an Jiaotong University, Xi'an, 710061, China

<sup>#</sup> These authors contributed to the work equally and should be regarded as co-first authors

**Figure S1. The Western blot results of compounds TL3, TL8, TL10, BS3, BS4, BS7, BS10, SR2, SR5 and SR10.**

**The nomenclature, chemical structure, HPLC, HRMS, <sup>1</sup>H-NMR and <sup>13</sup>C-NMR spectra data of title compounds.**

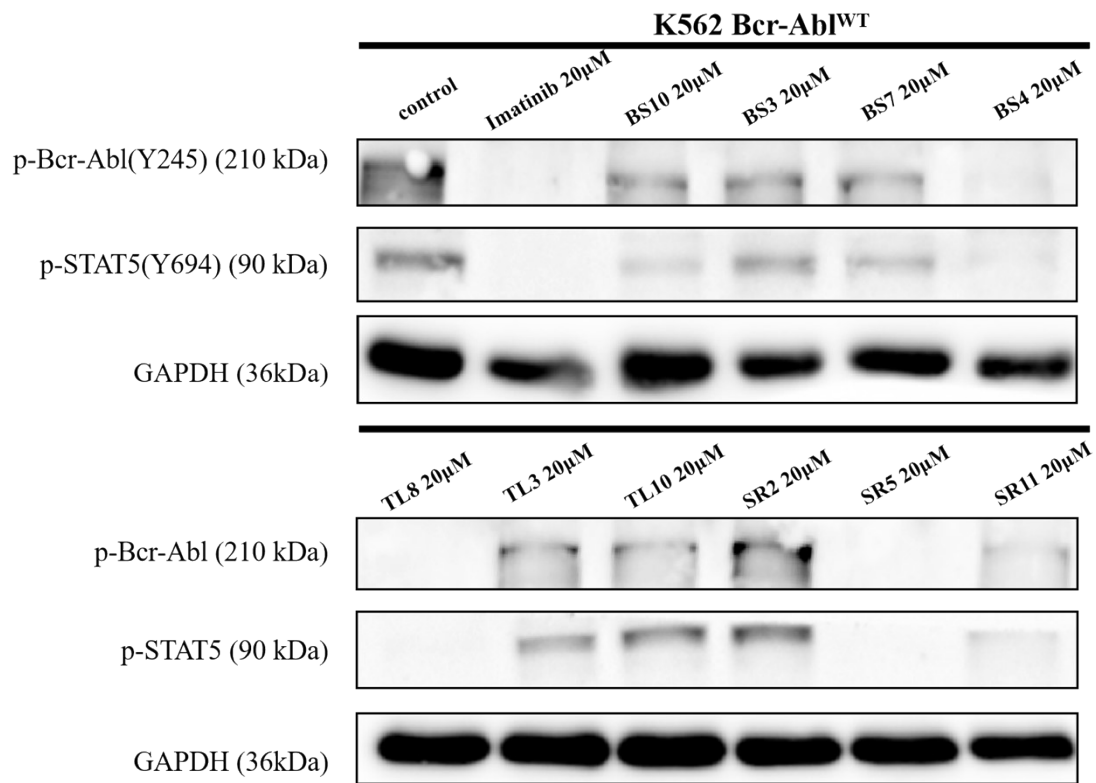

Figure S1. The effect of compounds **TL3**, **TL8**, **TL10**, **BS3**, **BS4**, **BS7**, **BS10**, **SR2**, **SR5** and **SR10** on phosphorylation level of Bcr-Abl and STAT5 in CML cells. K562 cells were treated with DMSO (0.1%), and compounds at 20 μM for 48 h, respectively. The cells were lysed by RIPA (Radio Immunoprecipitation assay buffer) containing protease and phosphatase inhibitor, and p-Bcr-Abl, p-STAT5 and GAPDH levels were analyzed by Western blot.

(S)-5-(4-((1-((4-chloro-3-(trifluoromethyl)phenyl)amino)-3,3-dimethyl-1-oxobutan-2-yl)carbamoyl)phenyl)-N,N-diethylnicotinamide (TL1)

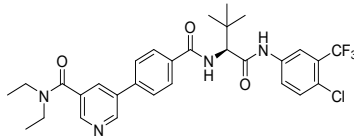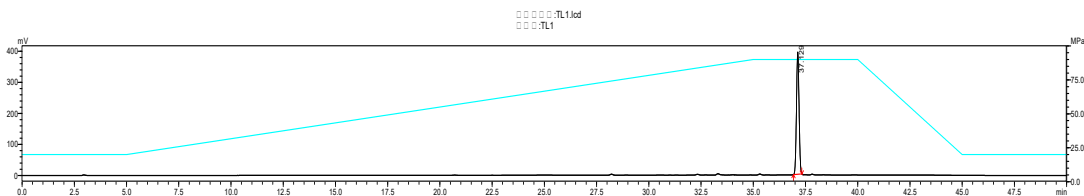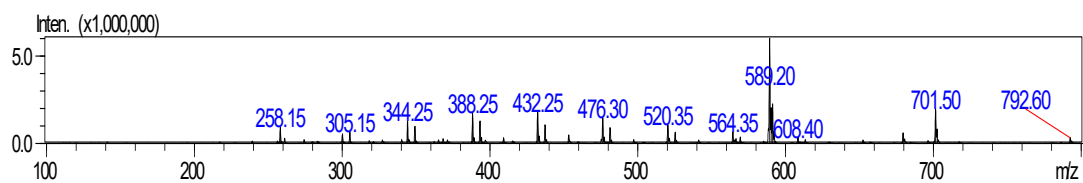

Item name: L-14  
Item description:

Channel name: 2: Average Time 0.3265 min : TOF MS (50-1500) 6eV ESI+ : Combined

4.73e7

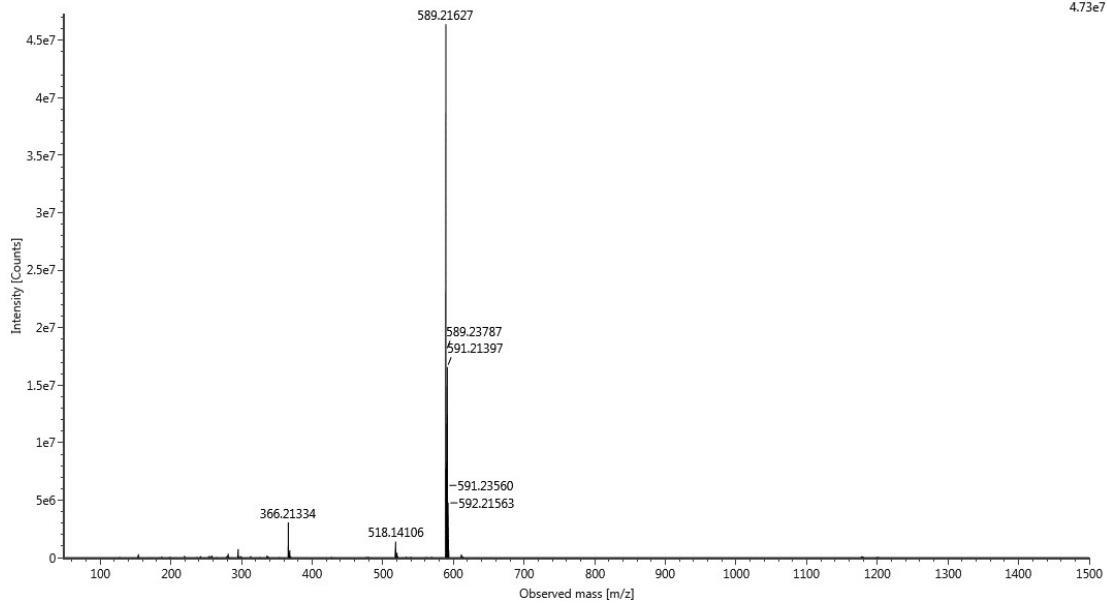

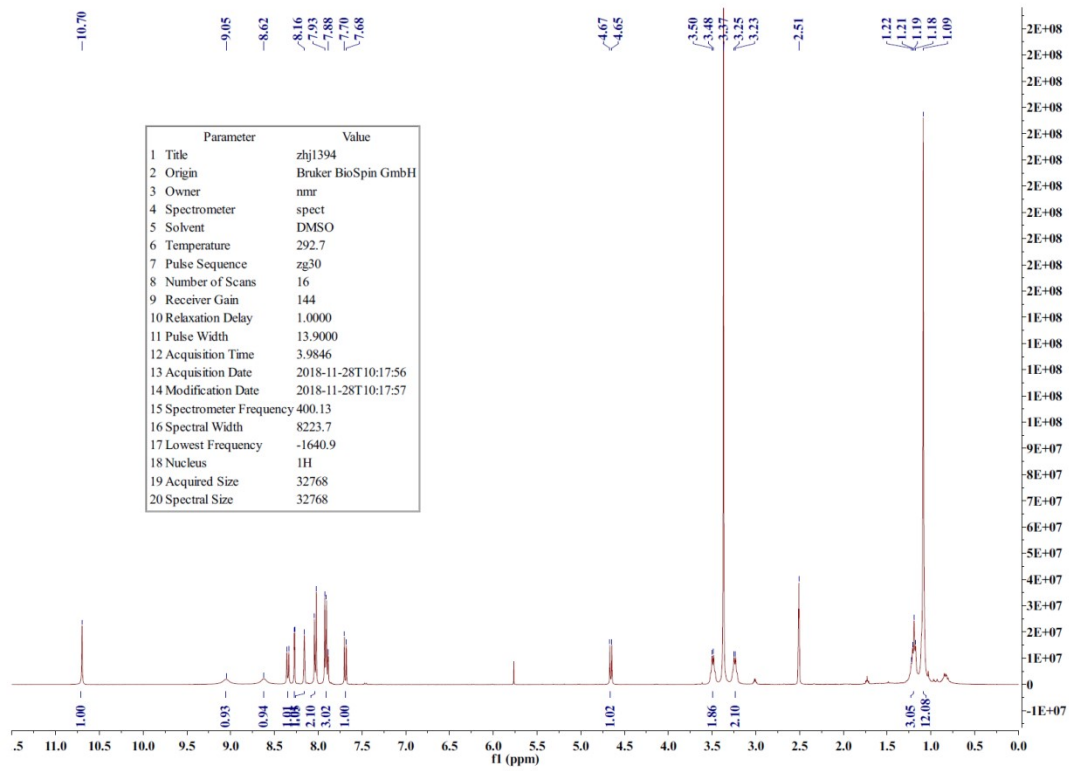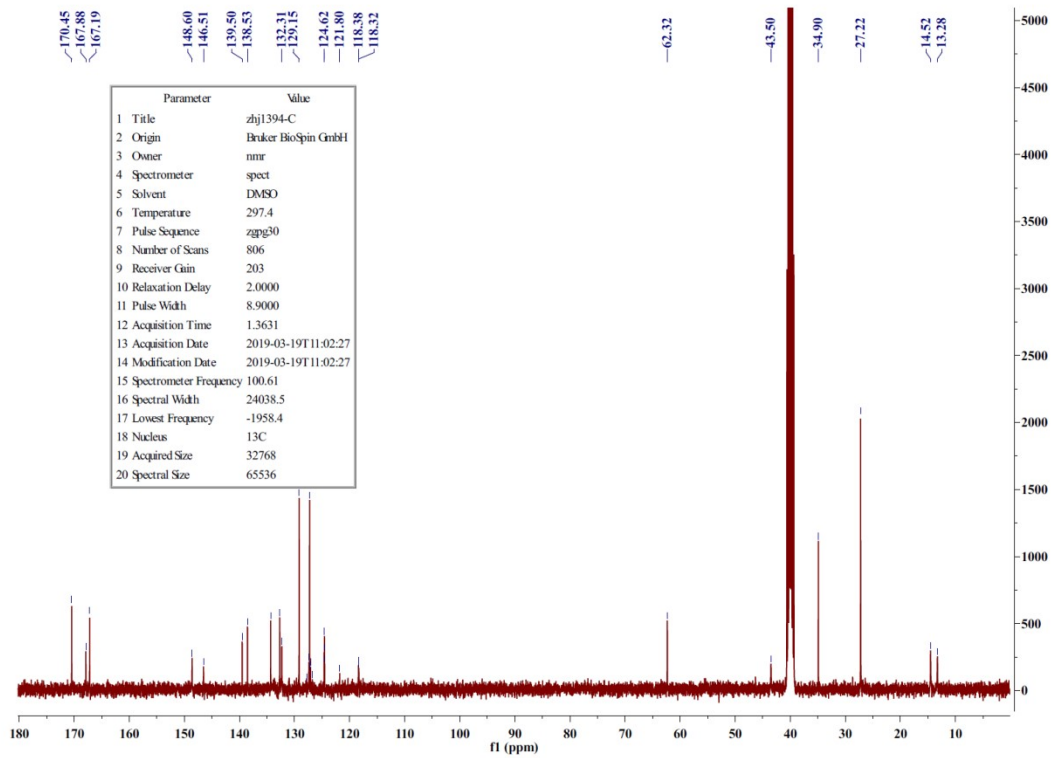

(S)-5-(4-((1-((4-chloro-3-(trifluoromethyl)phenyl)amino)-3,3-dimethyl-1-oxobutan-2-yl)carbamoyl)phenyl)-N-cyclopropylnicotinamide (TL2)

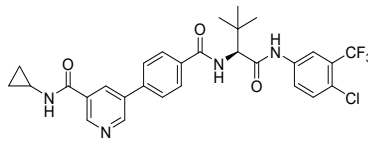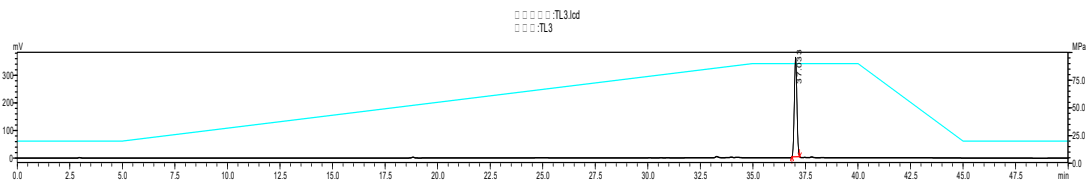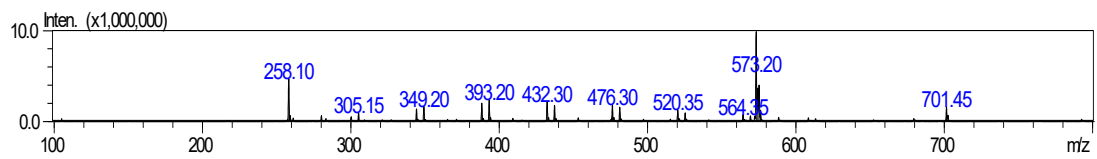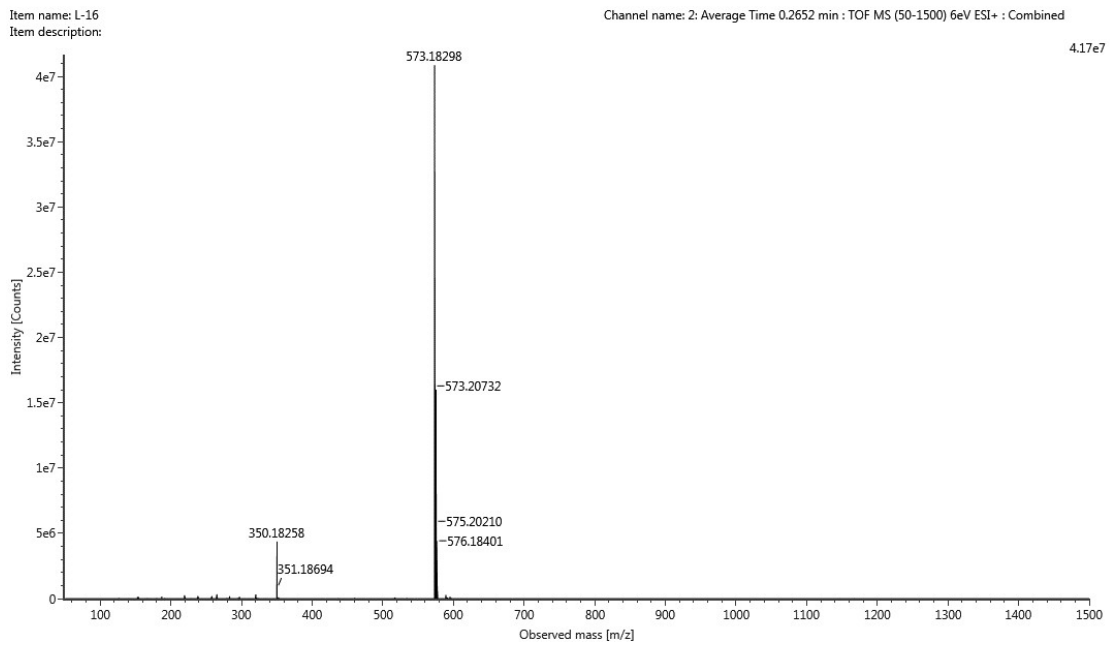

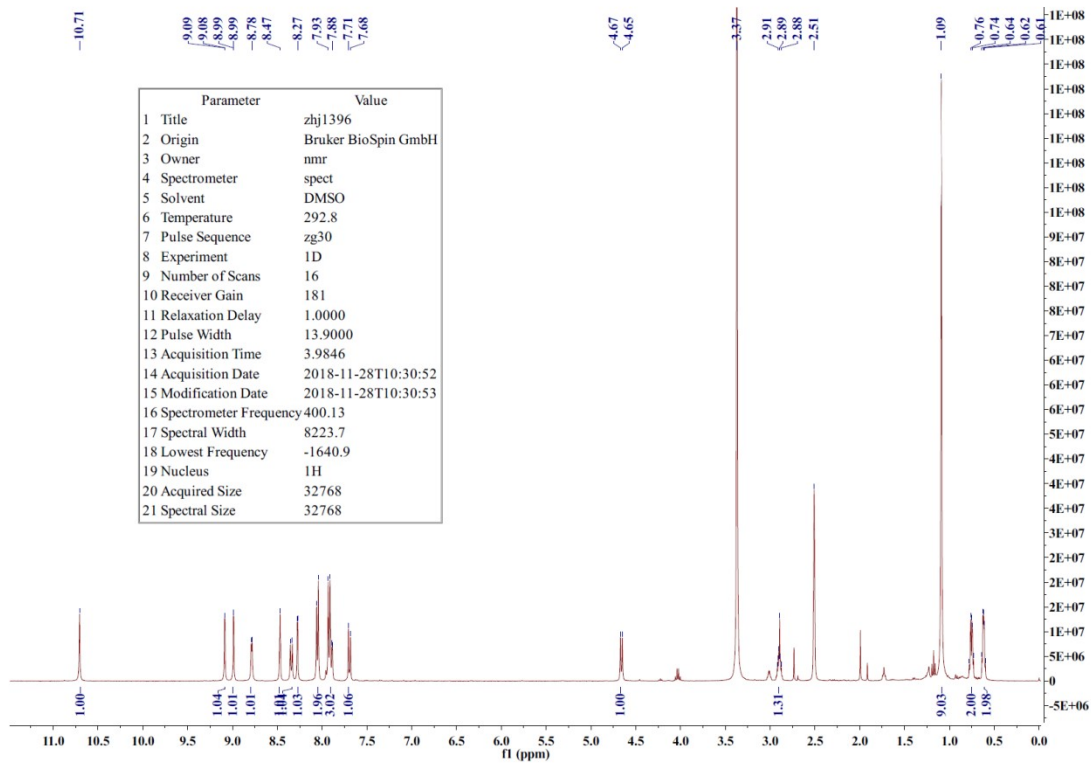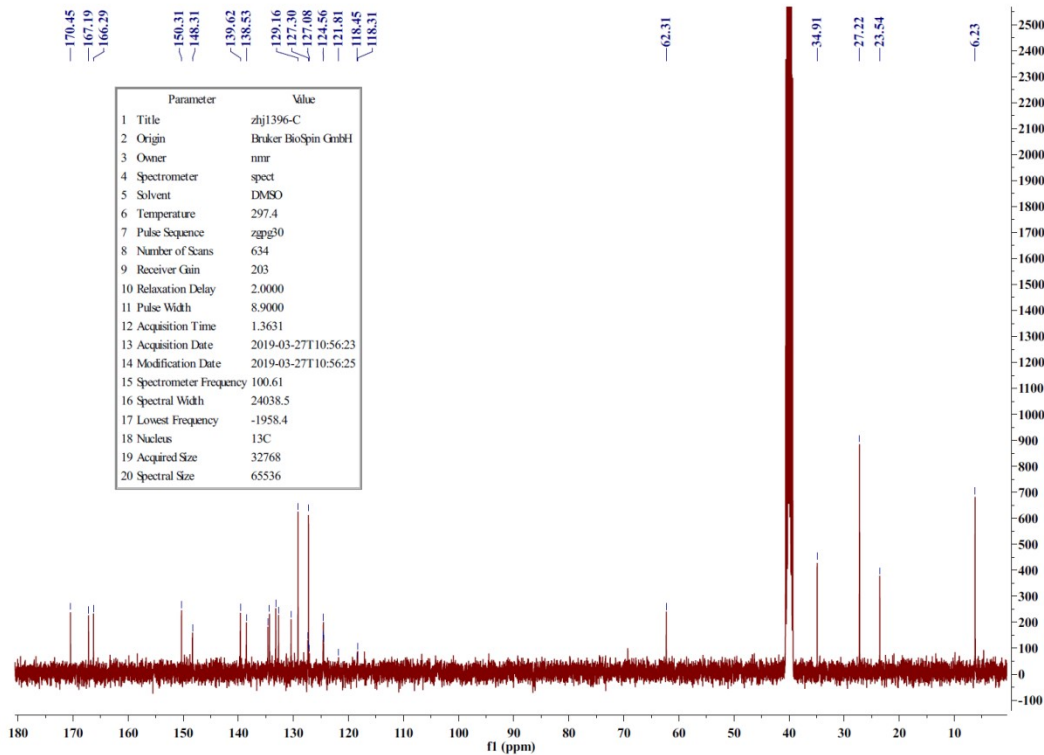

(S)-N-(1-((4-chloro-3-(trifluoromethyl)phenyl)amino)-3,3-dimethyl-1-oxobutan-2-yl)-4-(6-(methylsulfonamido)pyridin-3-yl)benzamide (TL3)

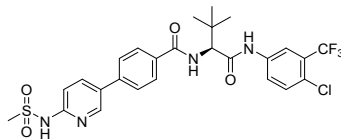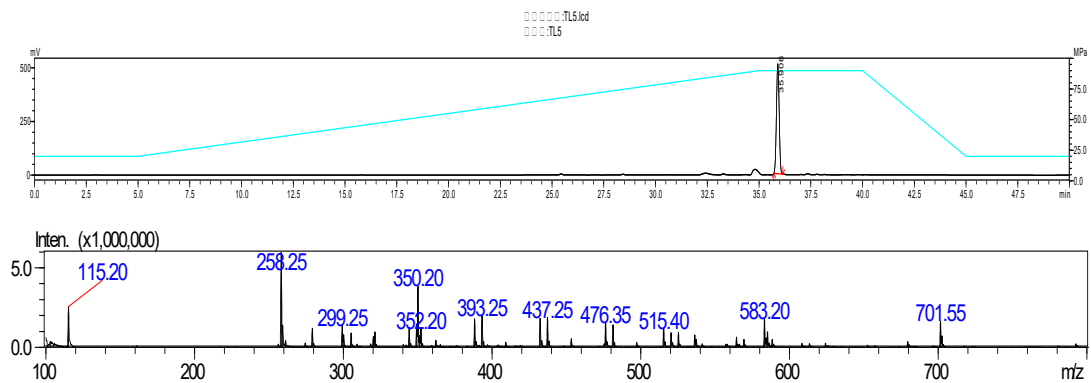

Item name: L-19  
Item description:

Channel name: 2: Average Time 0.2929 min : TOF MS (50-1500) 6eV ESI+ : Combined

9.59e6

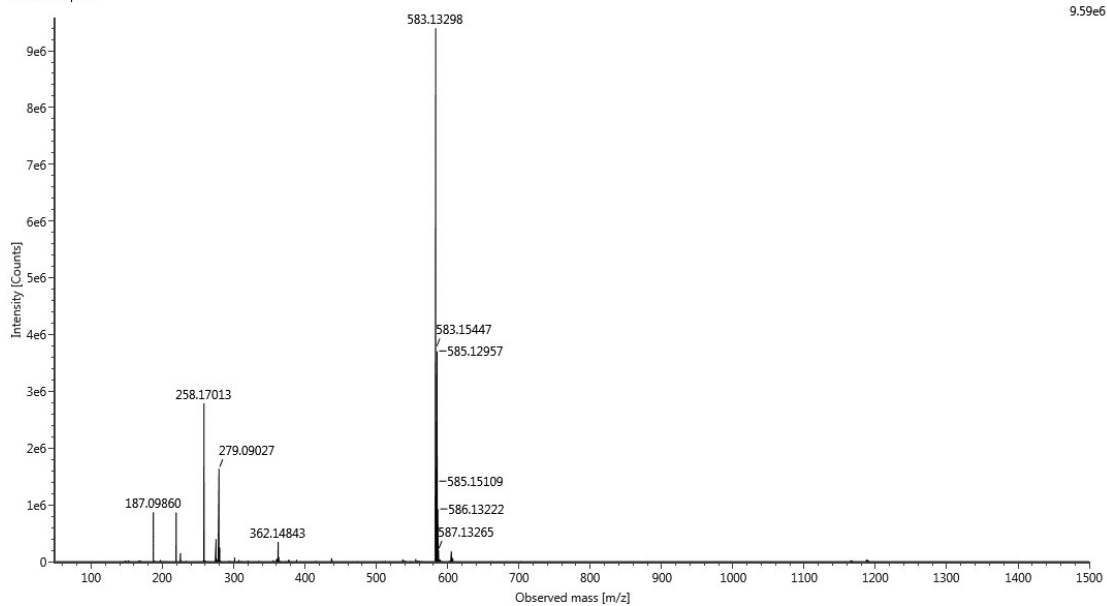

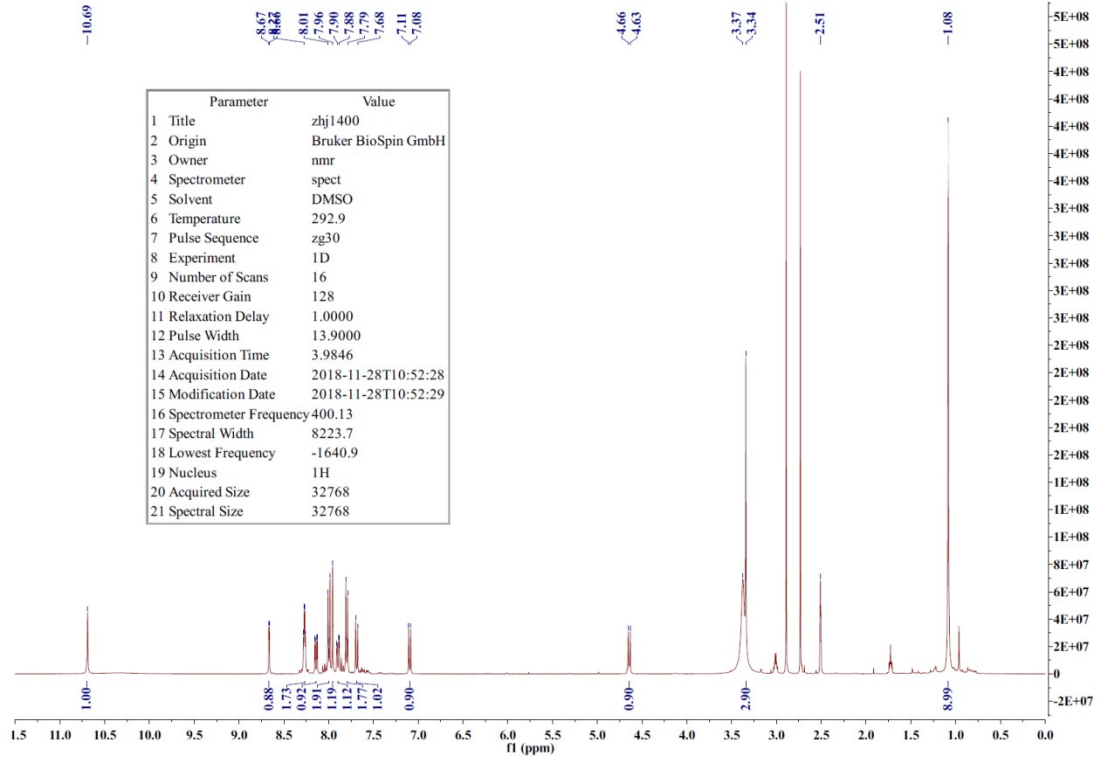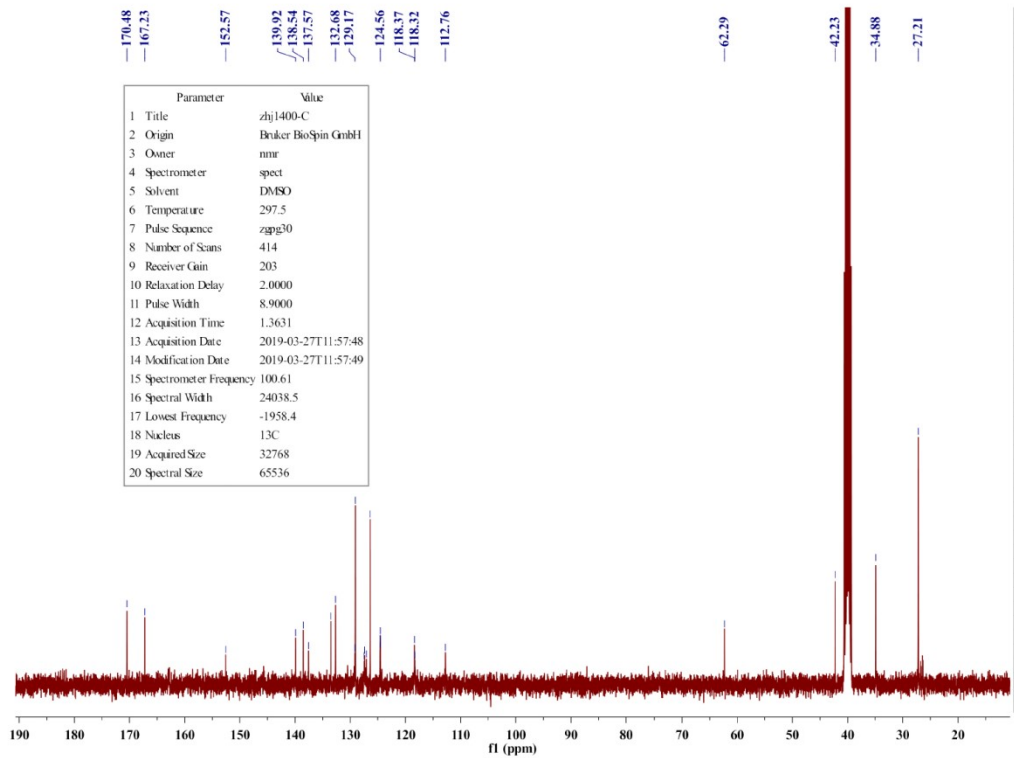



(S)-4-(6-acetamidopyridin-3-yl)-N-(1-((4-chloro-3-(trifluoromethyl)phenyl)amino)-3,3-dimethyl-1-oxobutan-2-yl)benzamide (TL4)

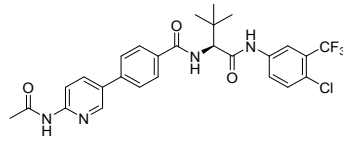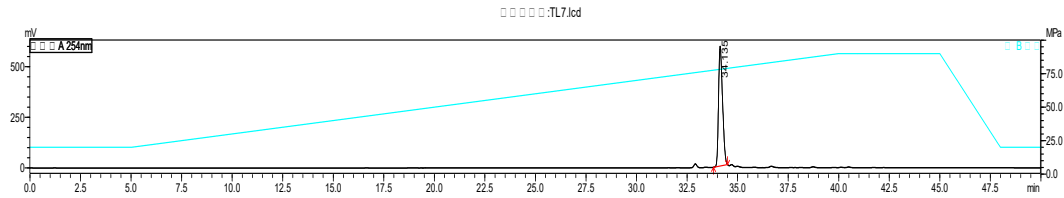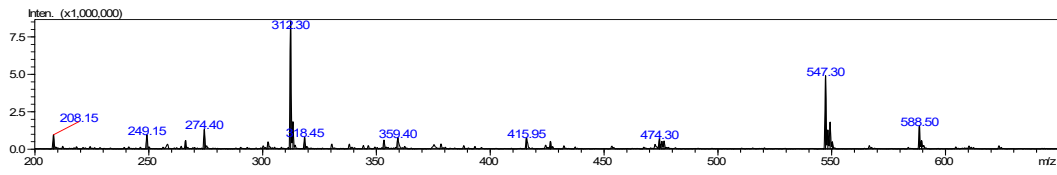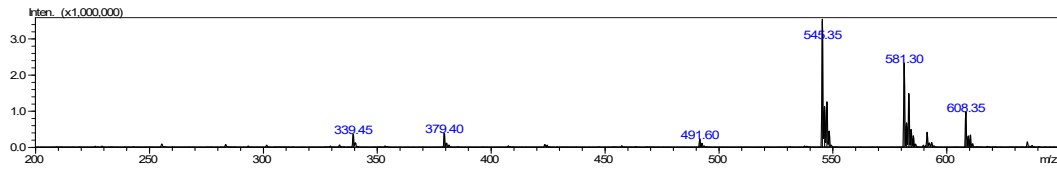

Item name: L-10  
Item description:

Channel name: 2: Average Time 0.1981 min : TOF MS (50-1500) 6eV ESI+ : Combined

6.02e7

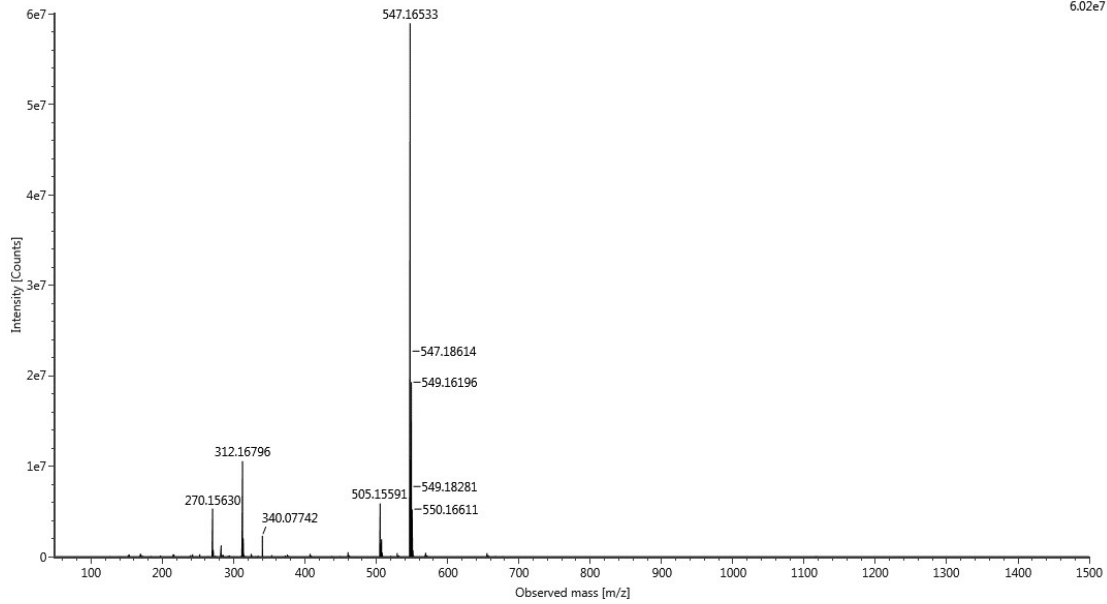

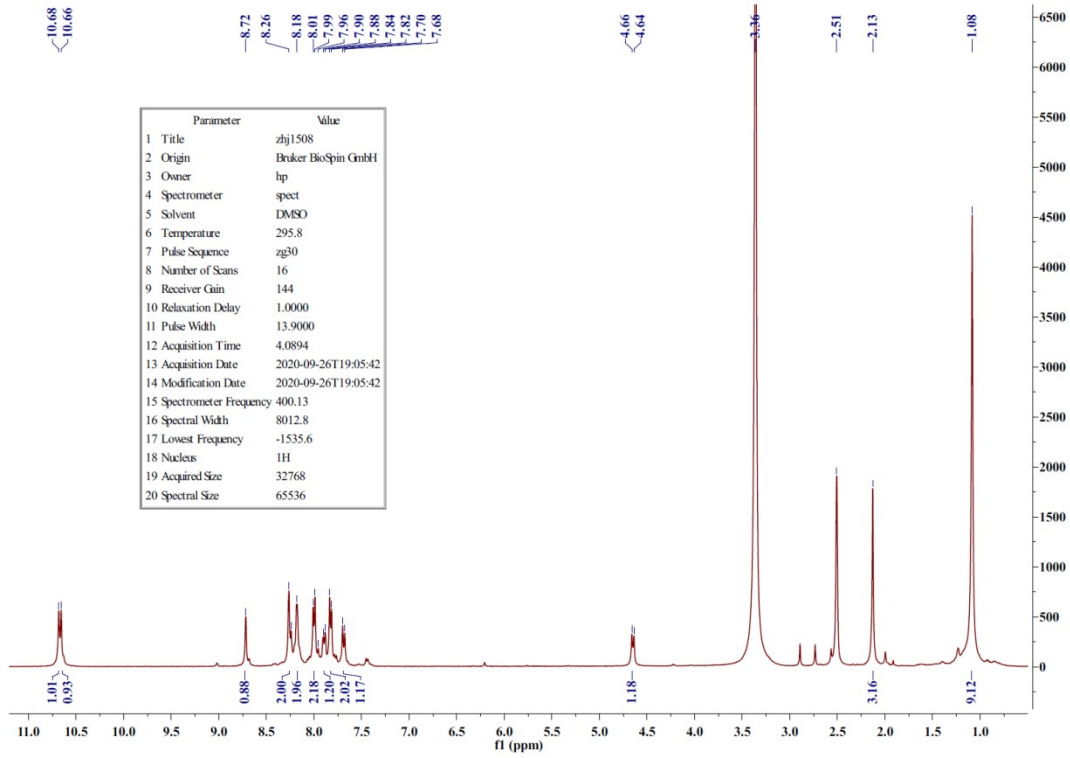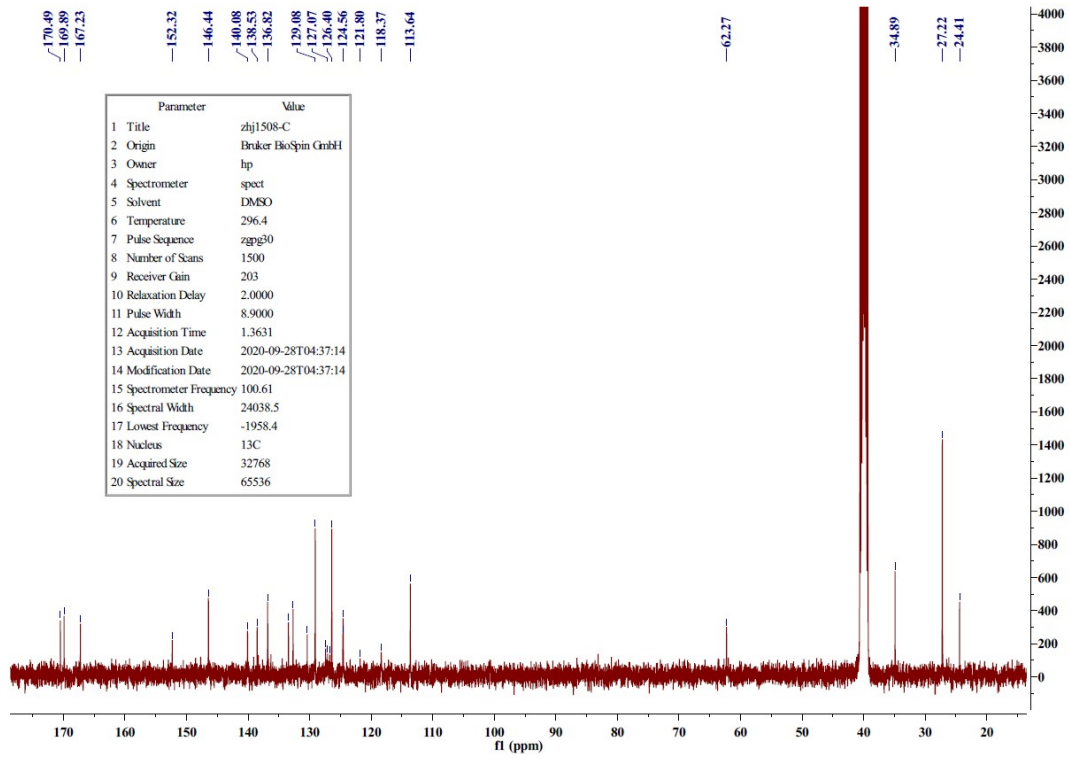

(S)-N-(1-((4-chloro-3-(trifluoromethyl)phenyl)amino)-3,3-dimethyl-1-oxobutan-2-yl)-4-(6-pivalamidopyridin-3-yl)benzamide (TL5)

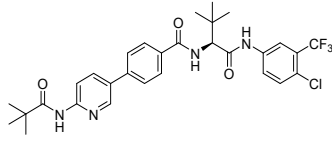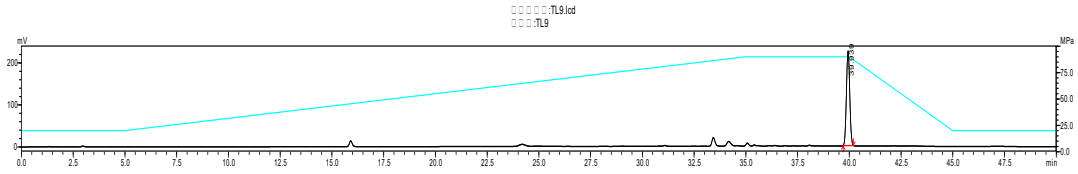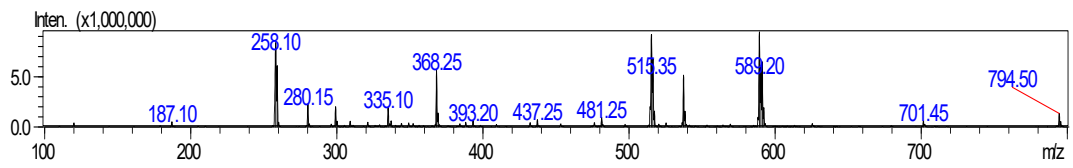

Item name: L-13  
Item description:

Channel name: 2: Average Time 0.2652 min : TOF MS (50-1500) 6eV ESI+ : Combined

2.33e7

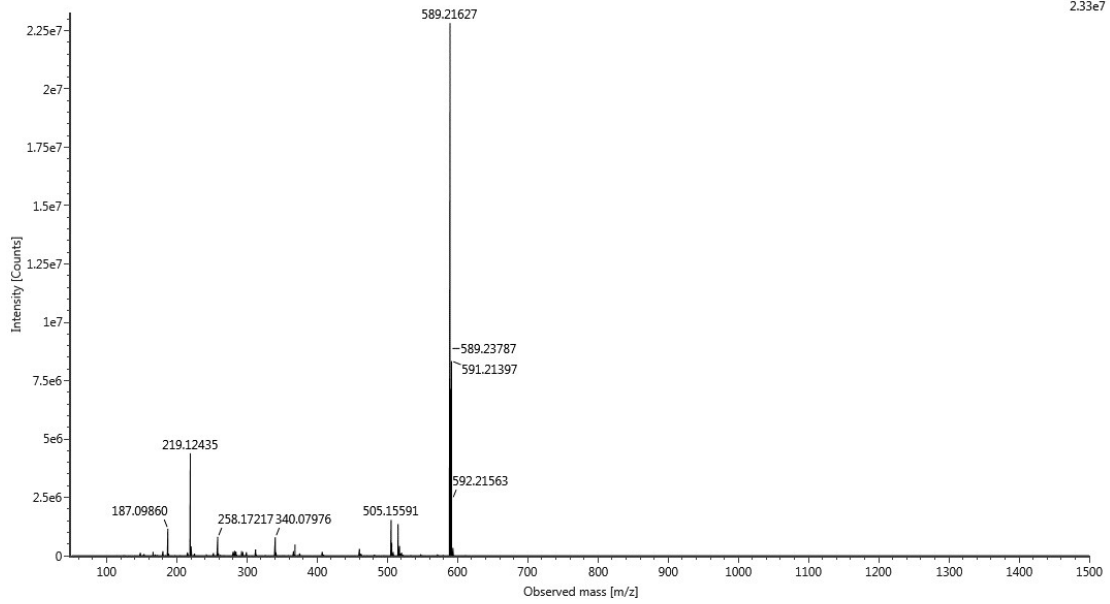

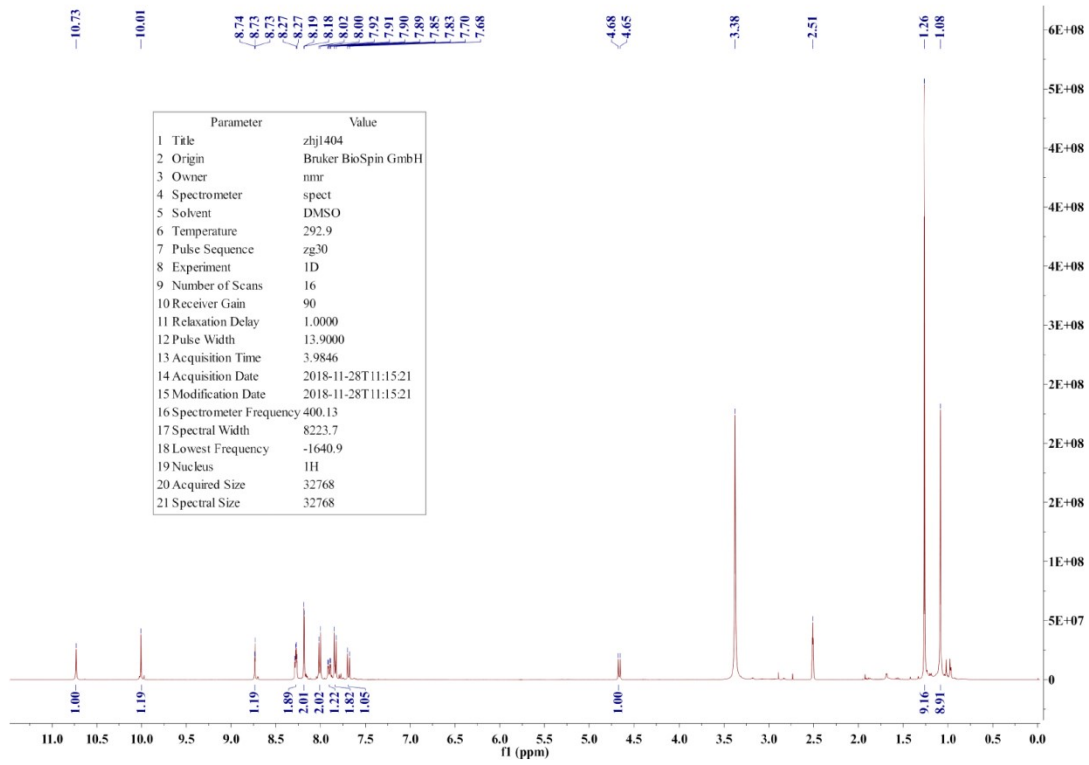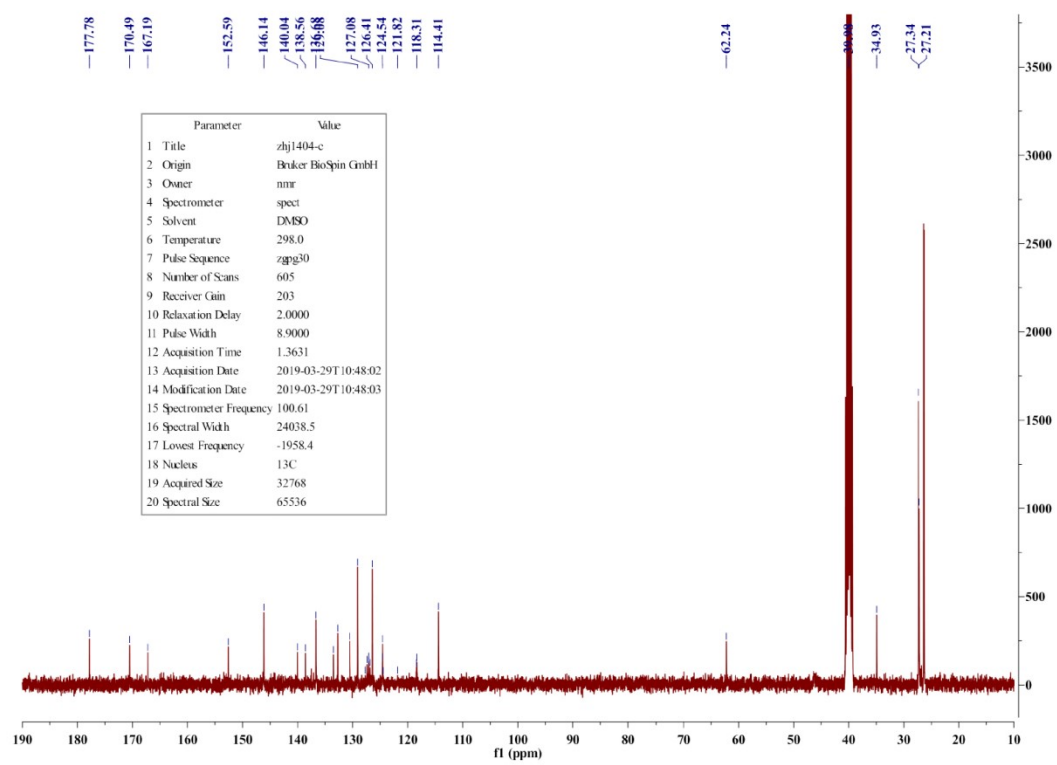

(S)-5-(3-((1-((4-chloro-3-(trifluoromethyl)phenyl)amino)-3,3-dimethyl-1-oxobutan-2-yl)carbamoyl)phenyl)-N,N-diethylnicotinamide (TL6)

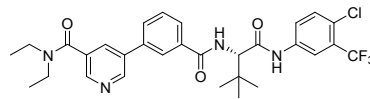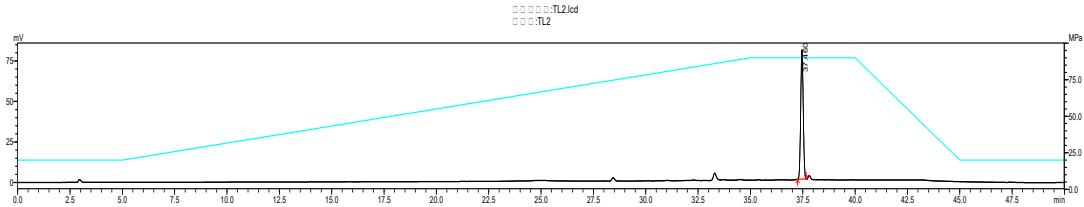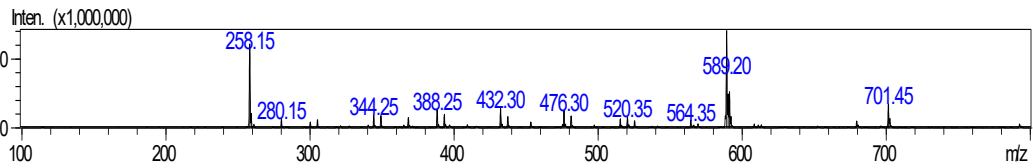

Item name: L-15  
Item description:

Channel name: 2: Average Time 0.2736 min : TOF MS (50-1500) 6eV ESI+ : Combined

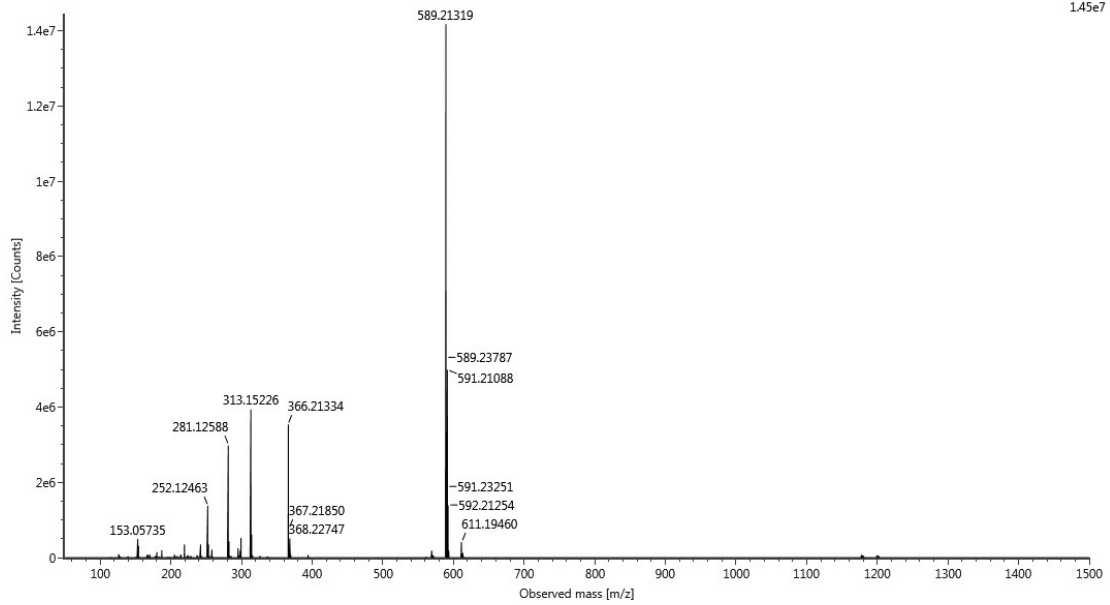

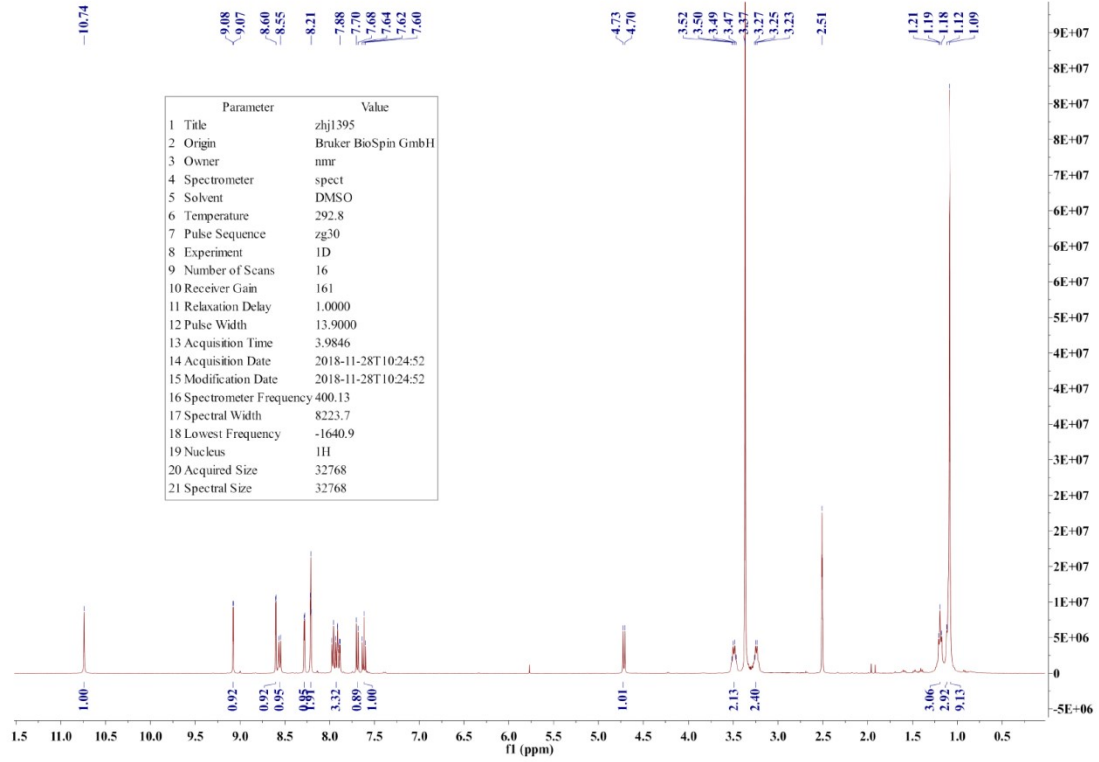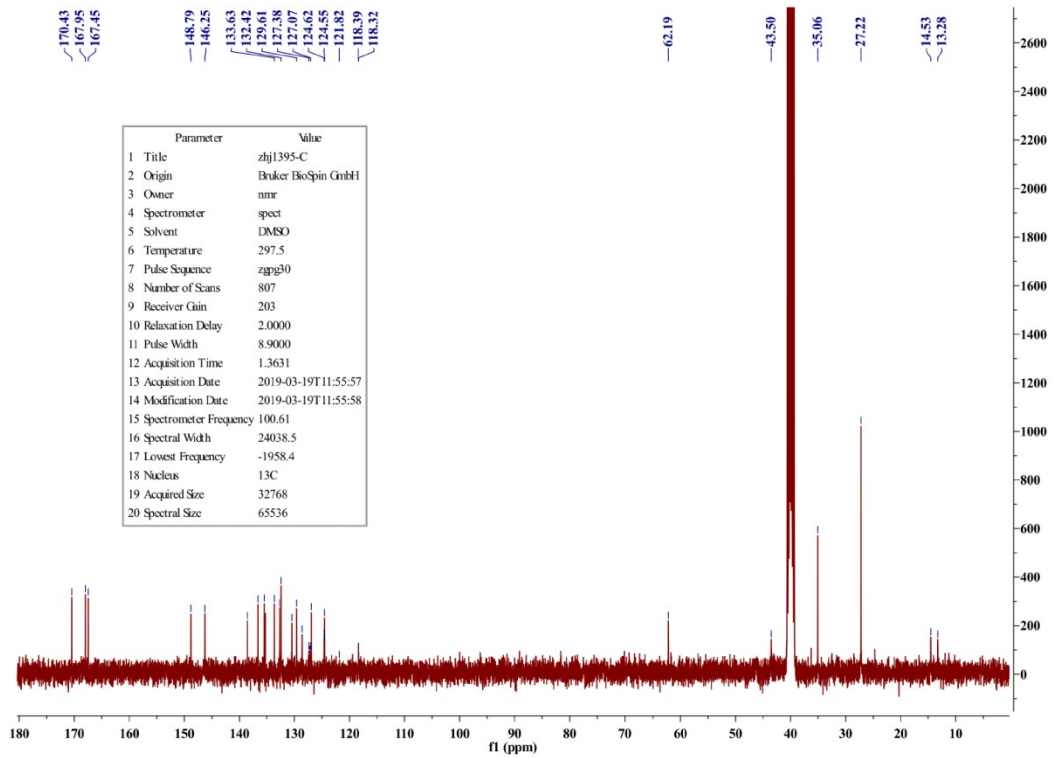

(S)-5-(3-((1-((4-chloro-3-(trifluoromethyl)phenyl)amino)-3,3-dimethyl-1-oxobutan-2-yl)carbamoyl)phenyl)-N-cyclopropylnicotinamide (TL7)

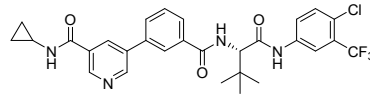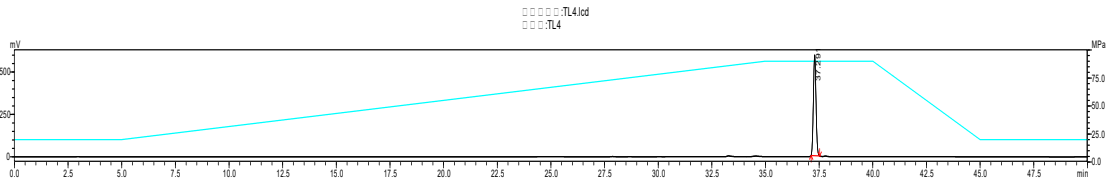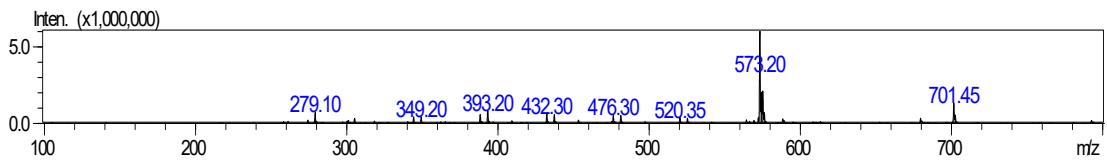

Item name: L-17  
Item description:

Channel name: 2: Average Time 0.2652 min : TOF MS (50-1500) 6eV ESI+ : Combined

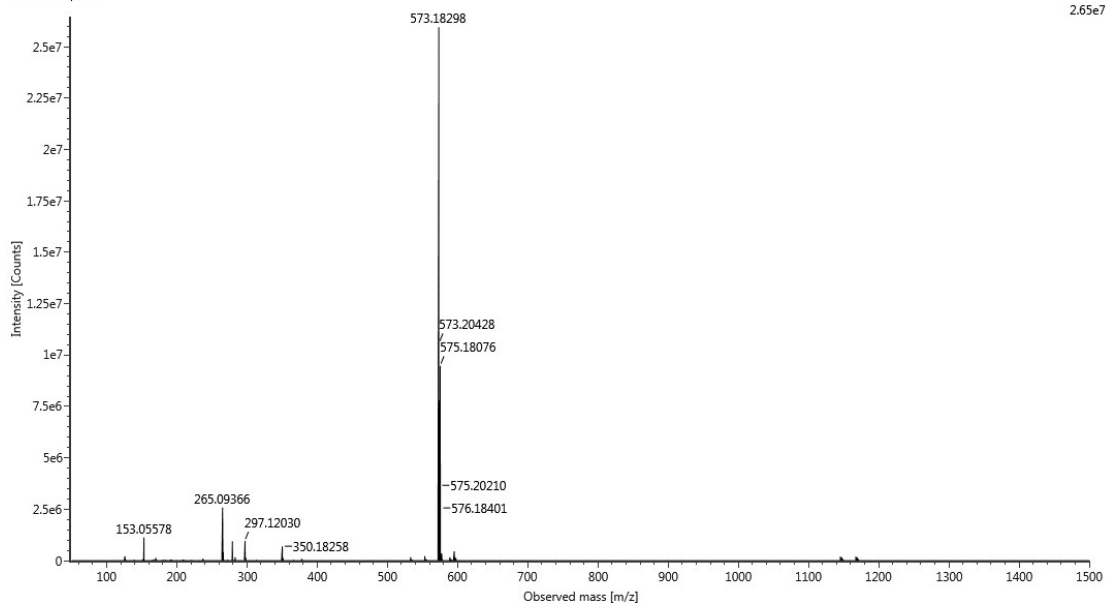

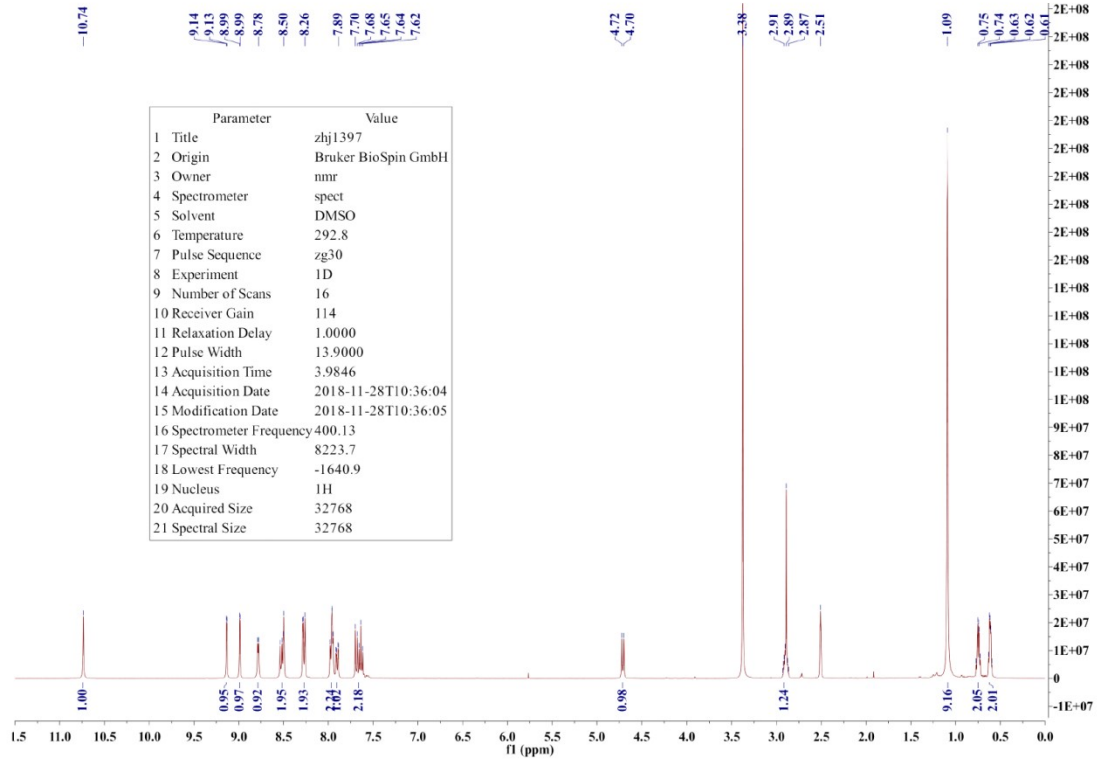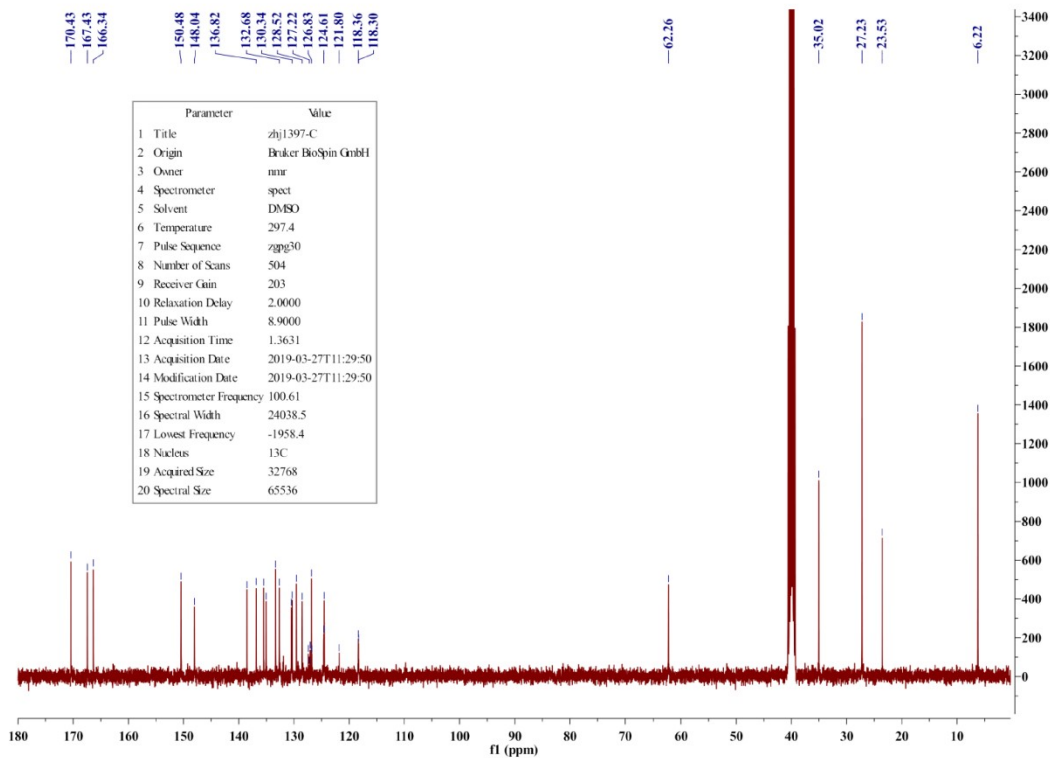



(S)-N-(1-((4-chloro-3-(trifluoromethyl)phenyl)amino)-3,3-dimethyl-1-oxobutan-2-yl)-3-(6-(methylsulfonamido)pyridin-3-yl)benzamide (TL8)

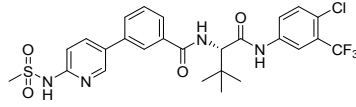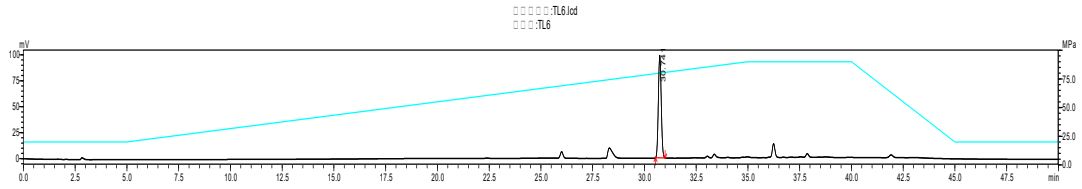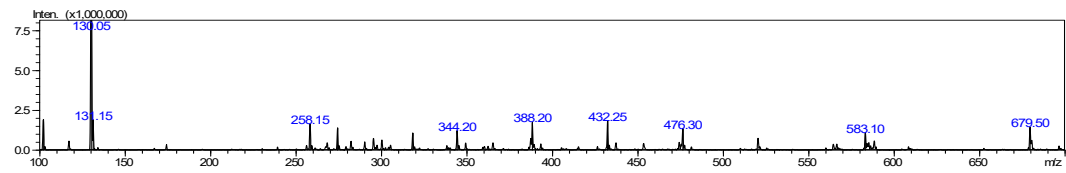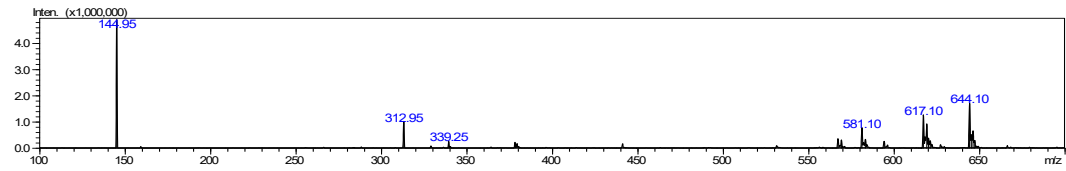

Item name: L-11  
Item description:

Channel name: 2: Average Time 0.2233 min : TOF MS (50-1500) 6eV ESI+ : Combined

3.15e7

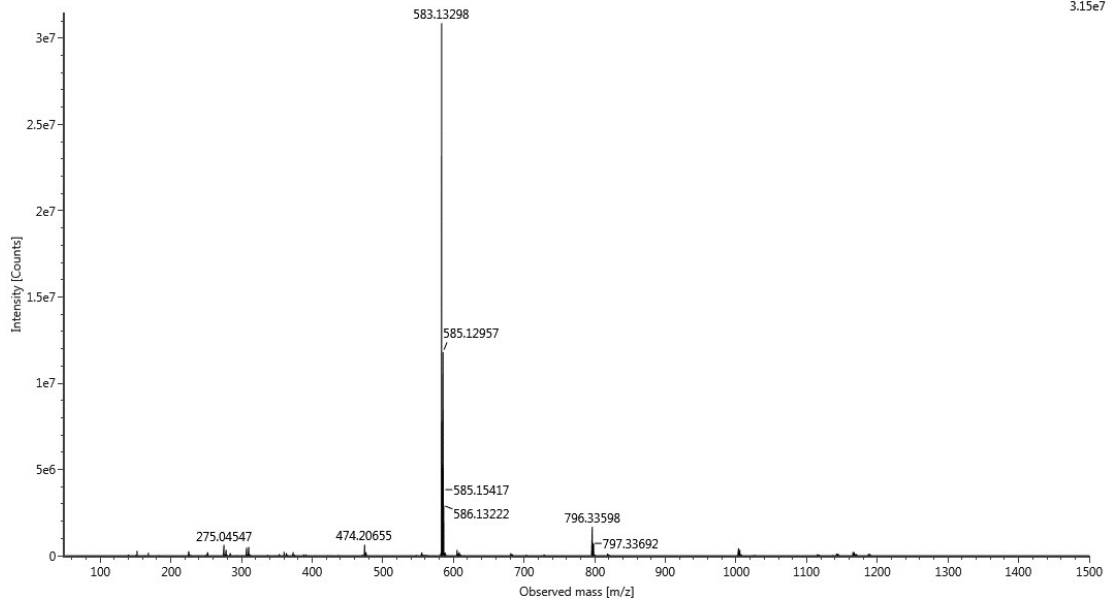

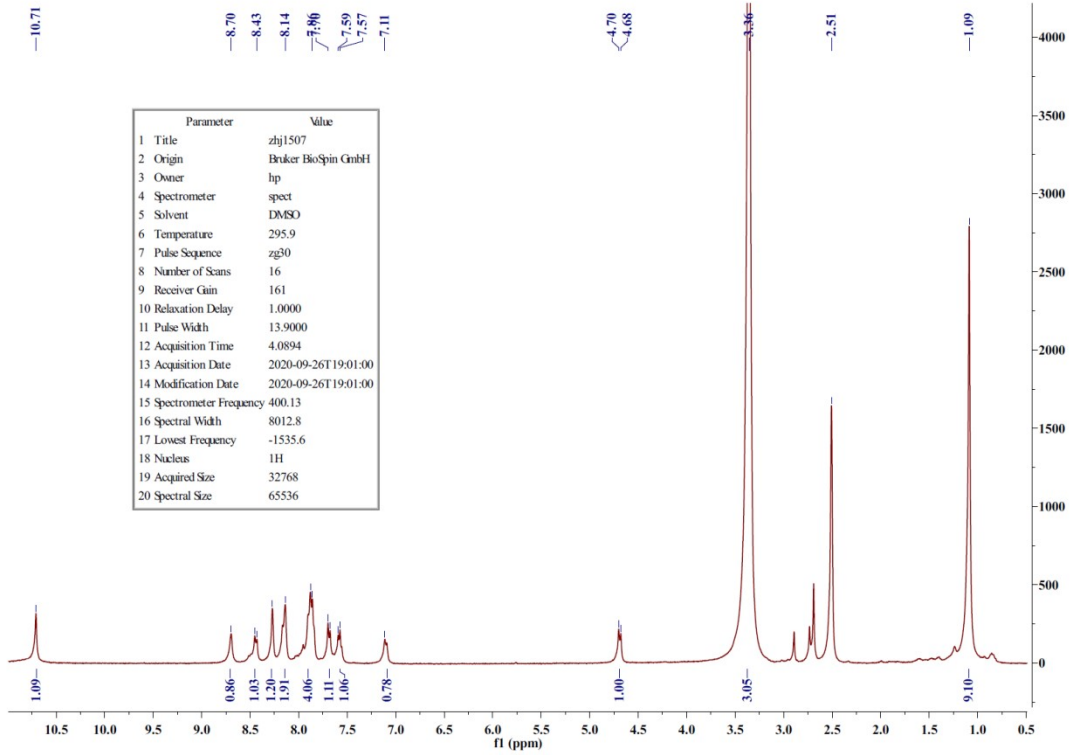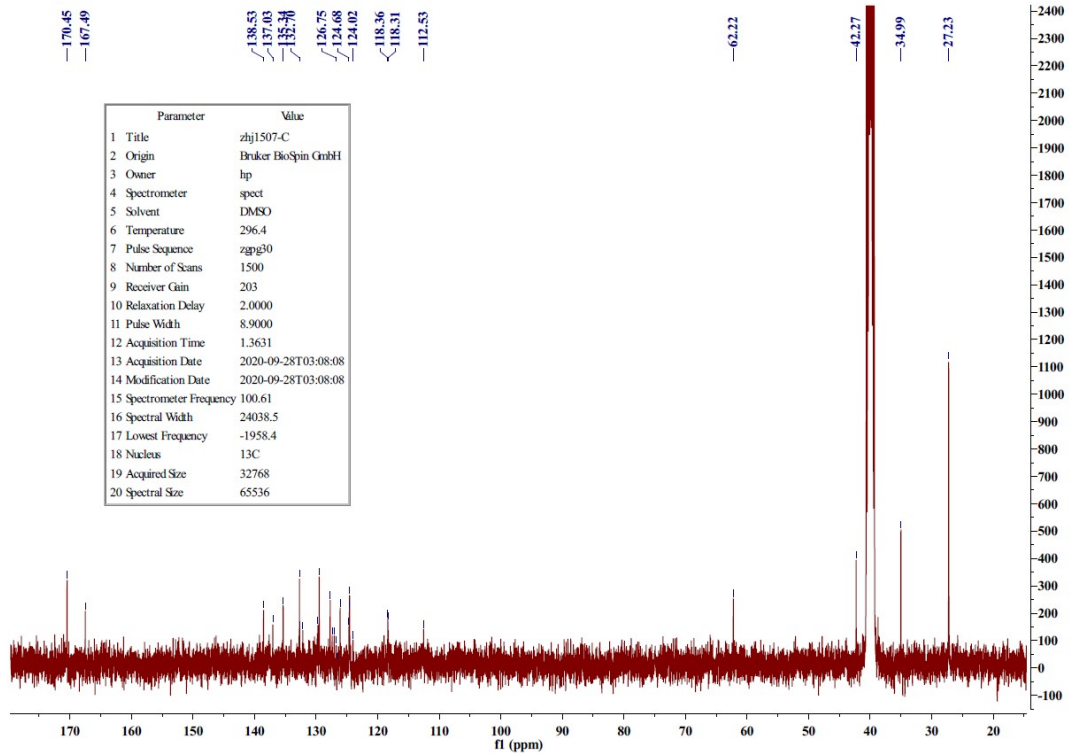

(S)-3-(6-acetamidopyridin-3-yl)-N-(1-((4-chloro-3-(trifluoromethyl)phenyl)amino)-3,3-dimethyl-1-oxobutan-2-yl)benzamide (TL9)

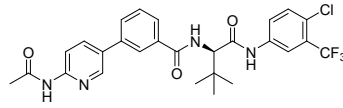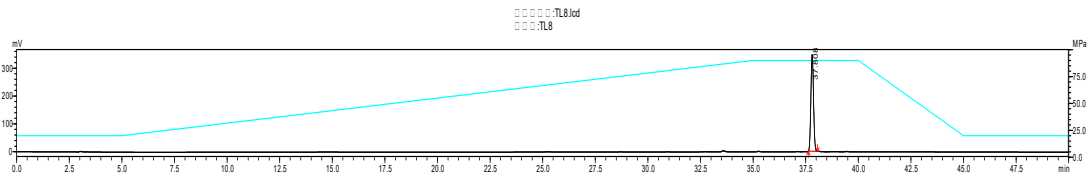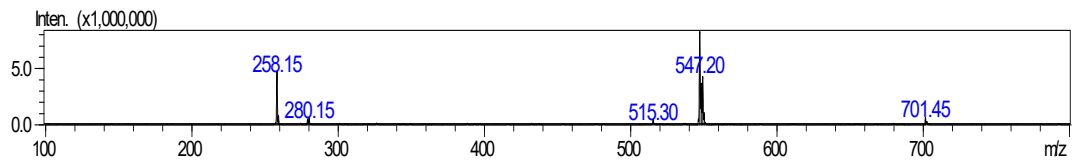

Item name: L-18  
Item description:

Channel name: 2: Average Time 0.3013 min : TOF MS (50-1500) 6eV ESI+ : Combined

1.47e7

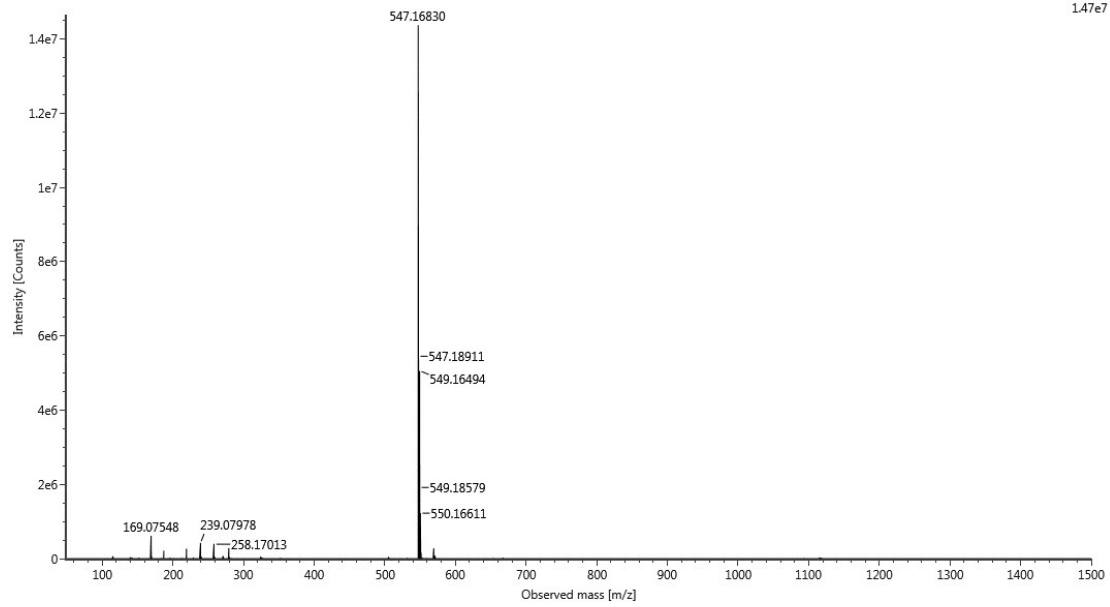



(S)-N-(1-((4-chloro-3-(trifluoromethyl)phenyl)amino)-3,3-dimethyl-1-oxobutan-2-yl)-3-(6-pivalamidopyridin-3-yl)benzamide (TL10)

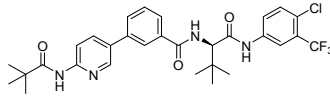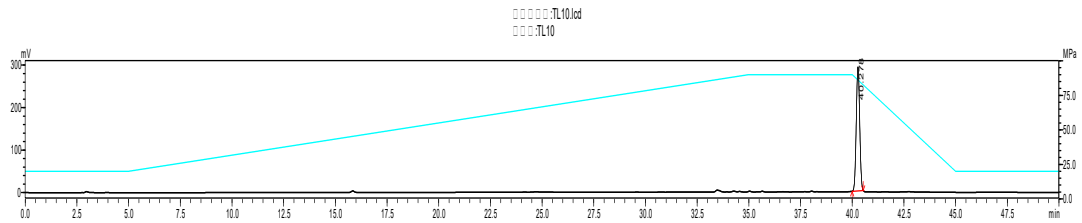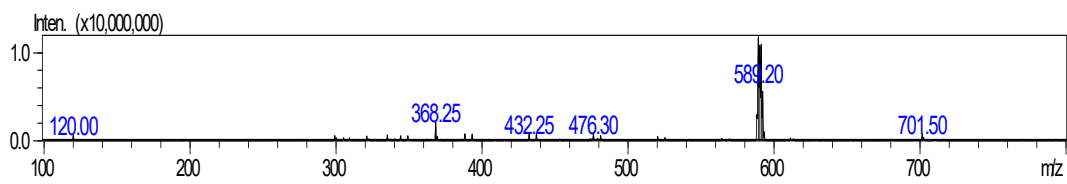

Item name: L-12  
Item description:

Channel name: 2: Average Time 0.3877 min : TOF MS (50-1500) 6eV ESI+ : Combined

5.01e7

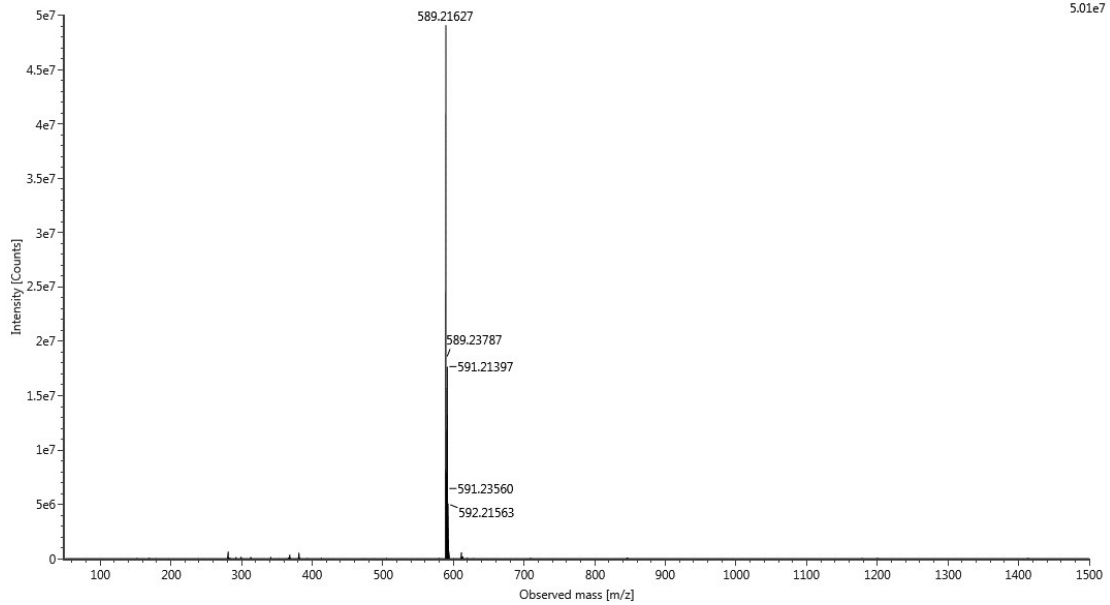

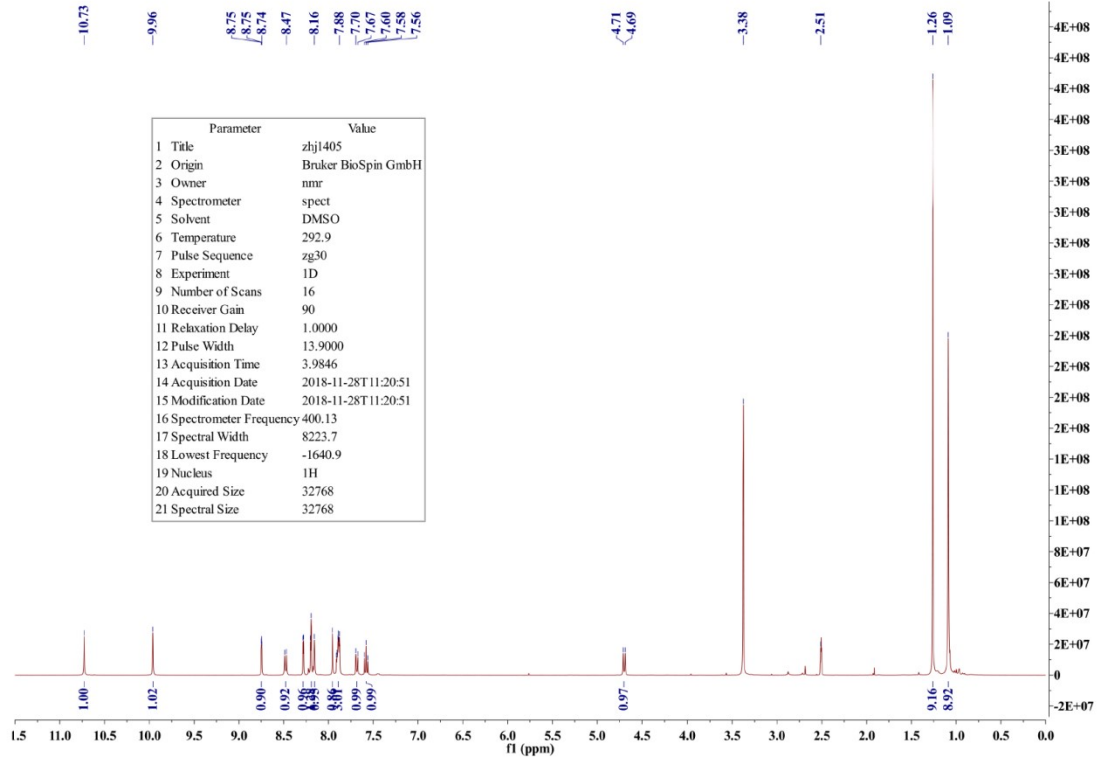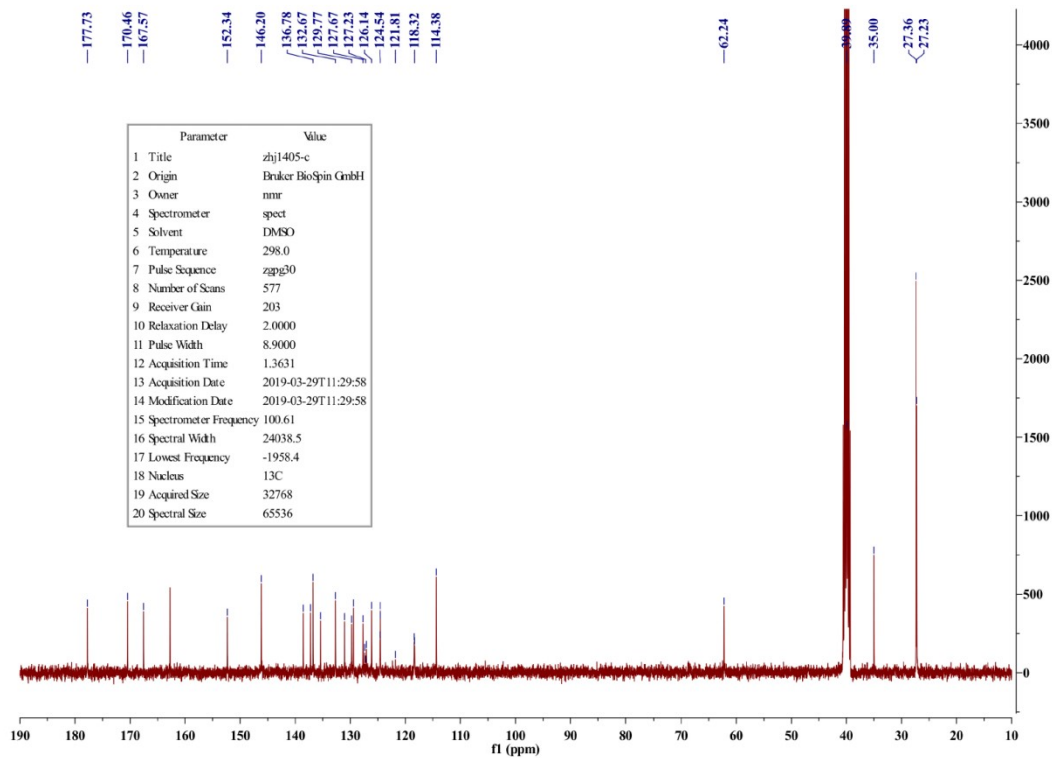

(S)-5-(4-((3-(tert-butoxy)-1-((4-chloro-3-(trifluoromethyl)phenyl)amino)-1-oxopropan-2-yl)carbamoyl)phenyl)-N,N-diethylnicotinamide (BS1)

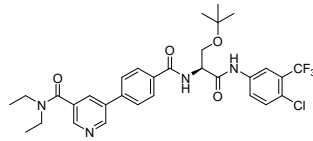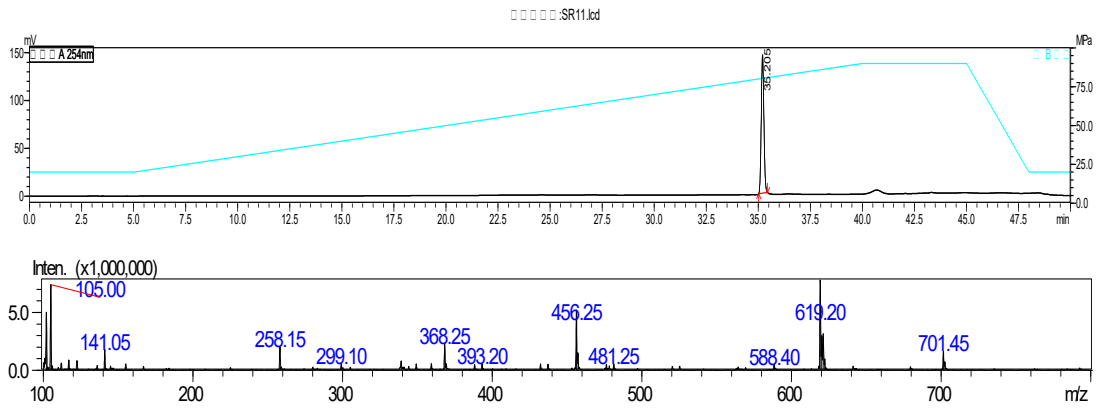

Item name: L-29  
Item description:

Channel name: 2: Average Time 0.3290 min : TOF MS (50-1500) 6eV ESI+ : Combined

2.66e7

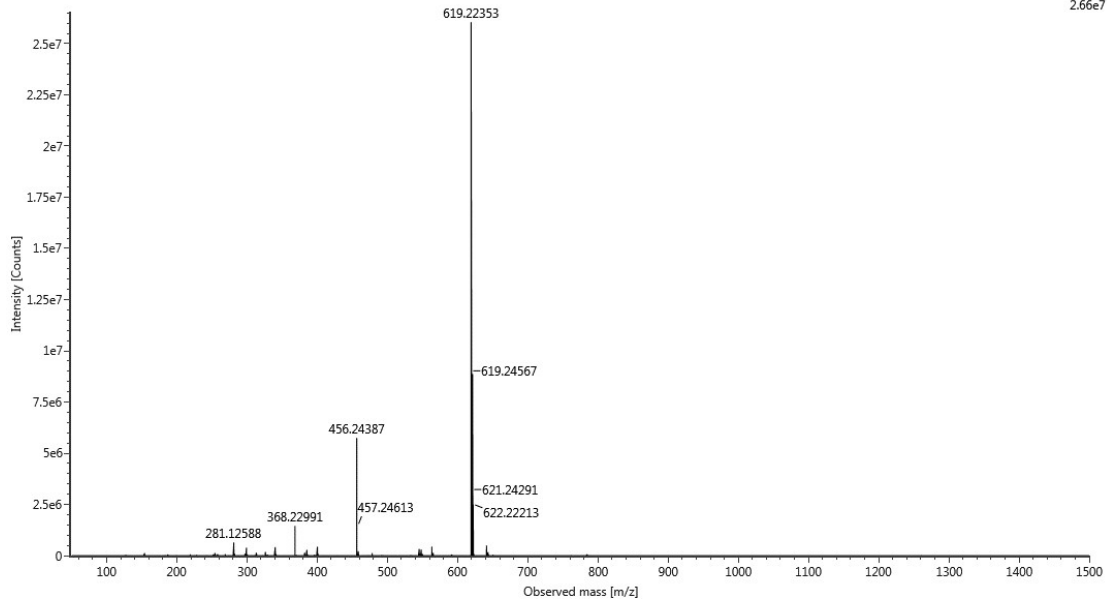

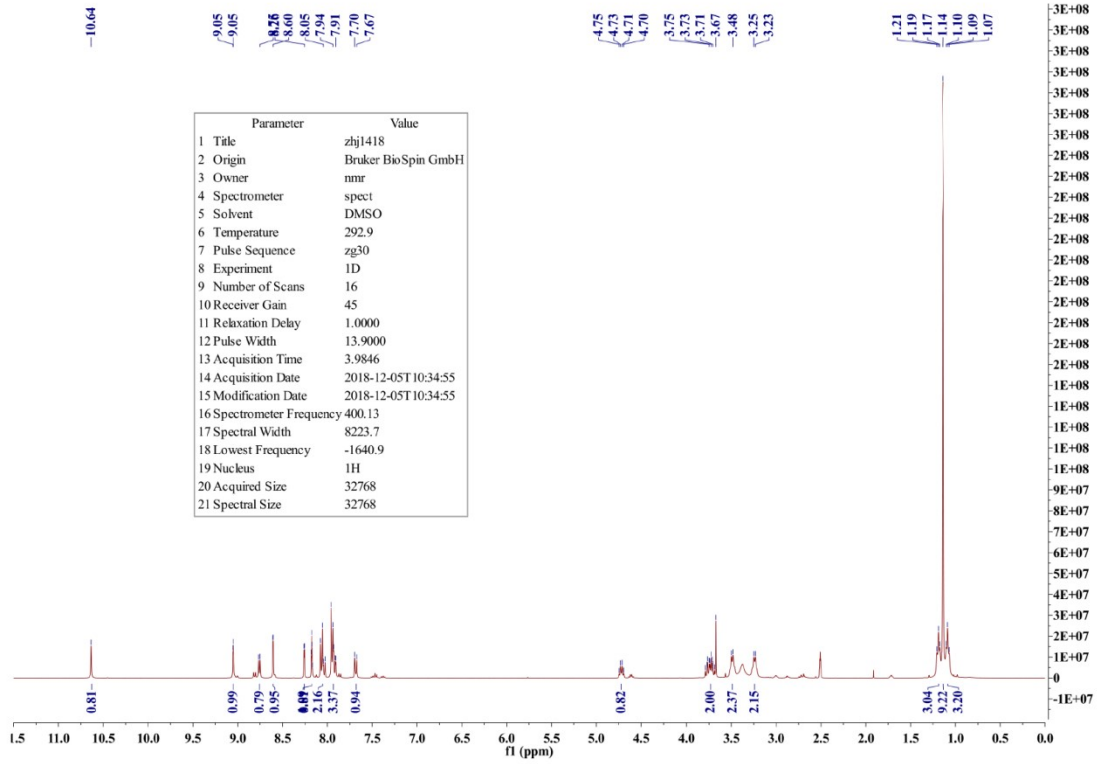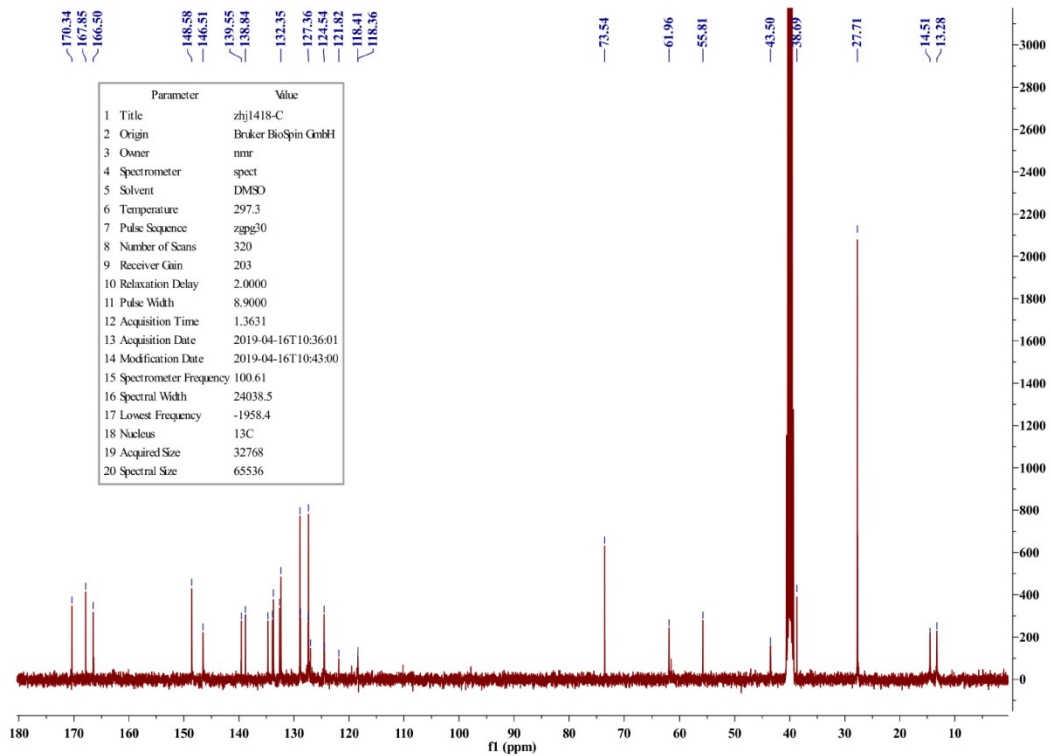



(S)-5-(4-((3-(tert-butoxy)-1-((4-chloro-3-(trifluoromethyl)phenyl)amino)-1-oxopropan-2-yl)carbamoyl)phenyl)-N-cyclopropylnicotinamide ( **BS2** )

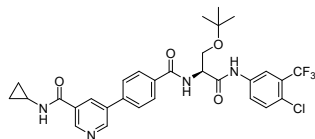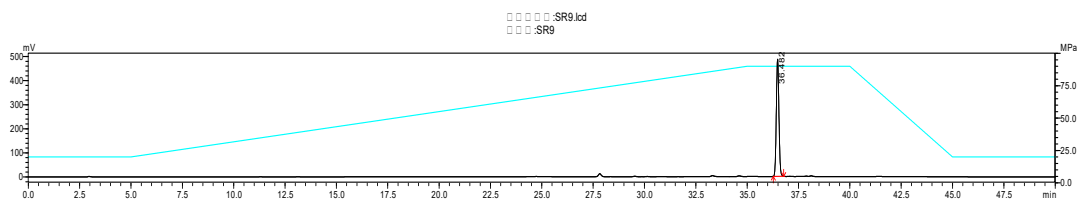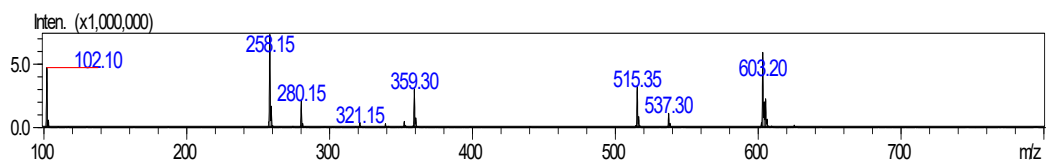

Item name: L-1  
Item description:

Channel name: 2: Average Time 0.2149 min : TOF MSe (50-2000) 6eV ESI+ : Centroided : Combined

7.69e7

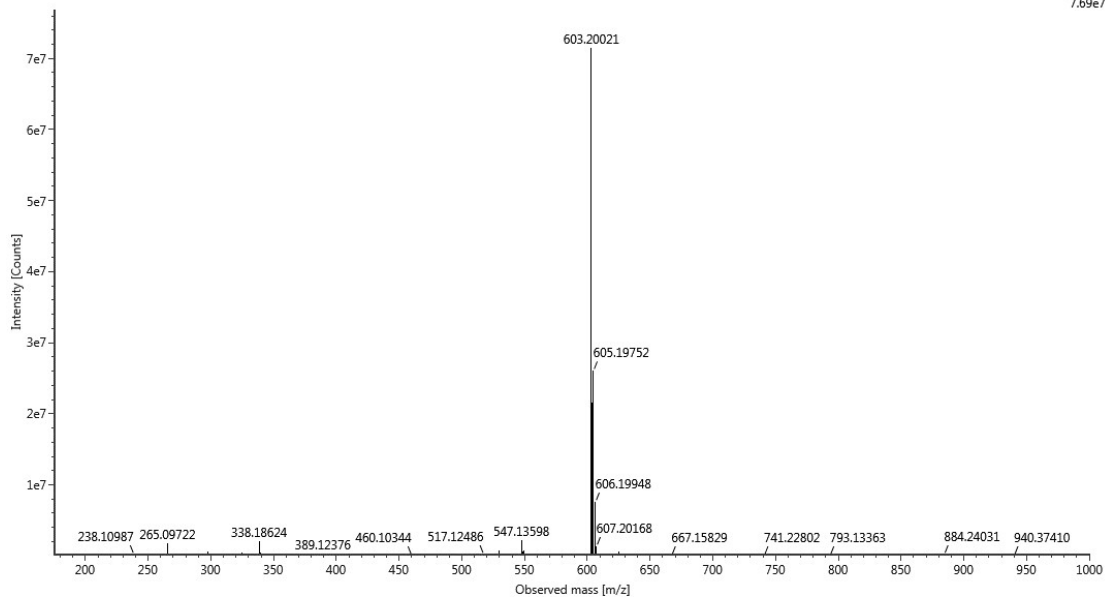

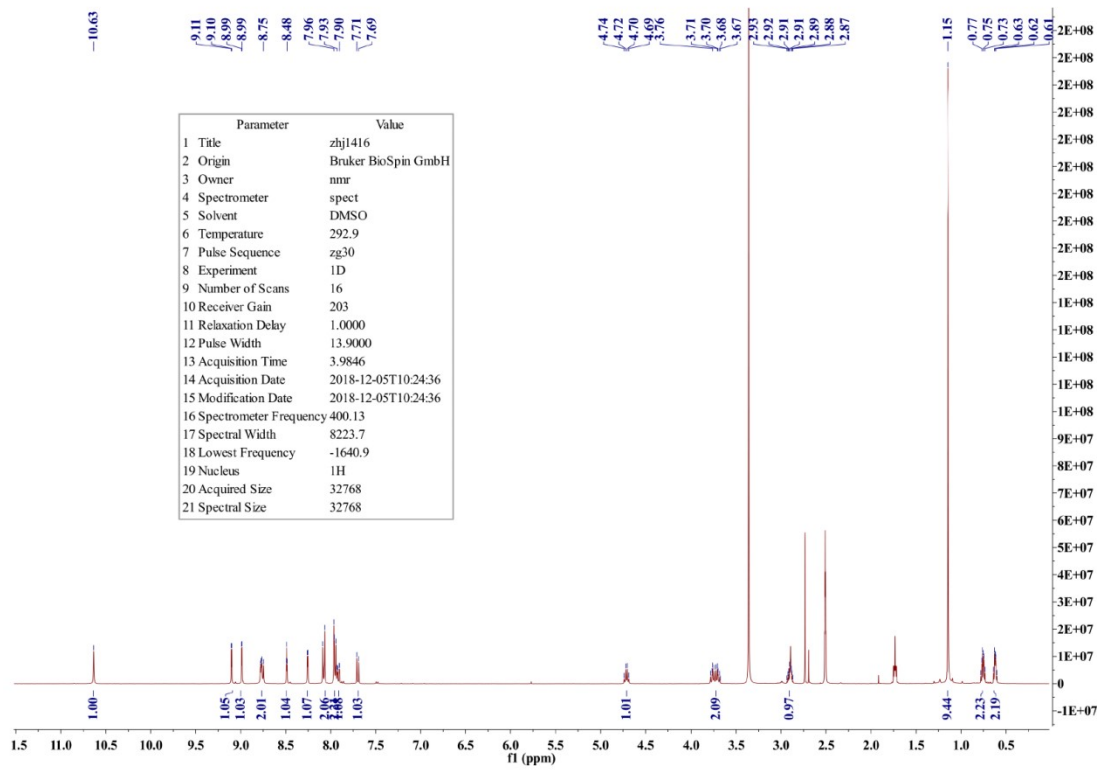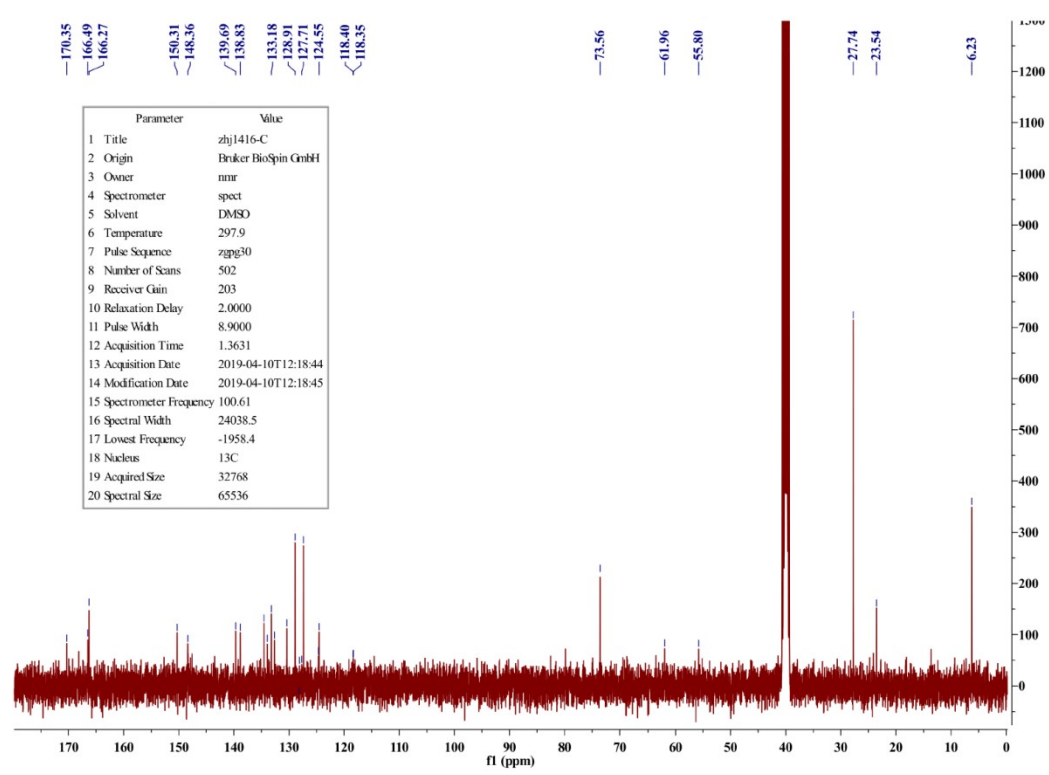

(S)-N-(3-(tert-butoxy)-1-((4-chloro-3-(trifluoromethyl)phenyl)amino)-1-oxopropan-2-yl)-4-(6-(methylsulfonamido)pyridin-3-yl)benzamide (BS3)

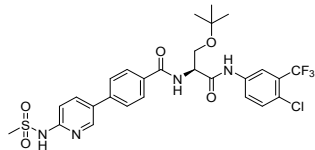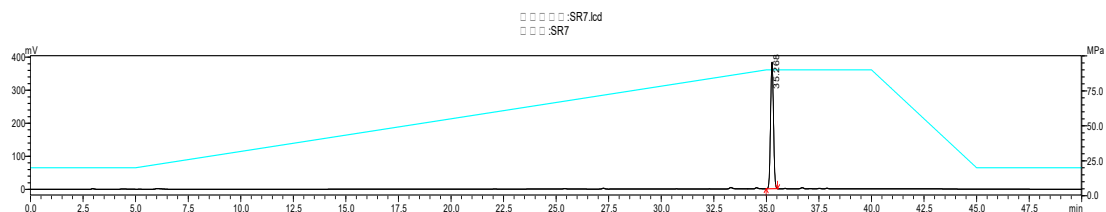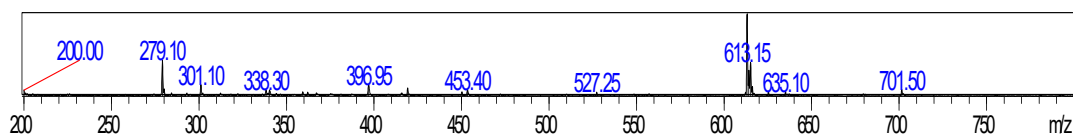

Item name: L-26  
Item description:

Channel name: 2: Average Time 0.3181 min : TOF MS (50-1500) 6eV ESI+ : Combined

1.39e7

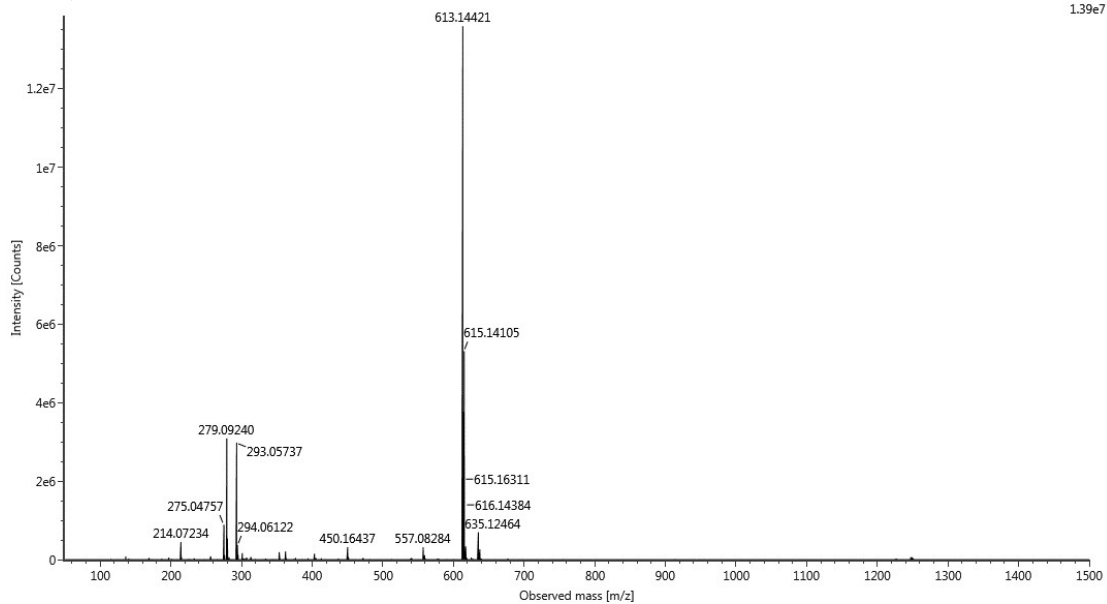

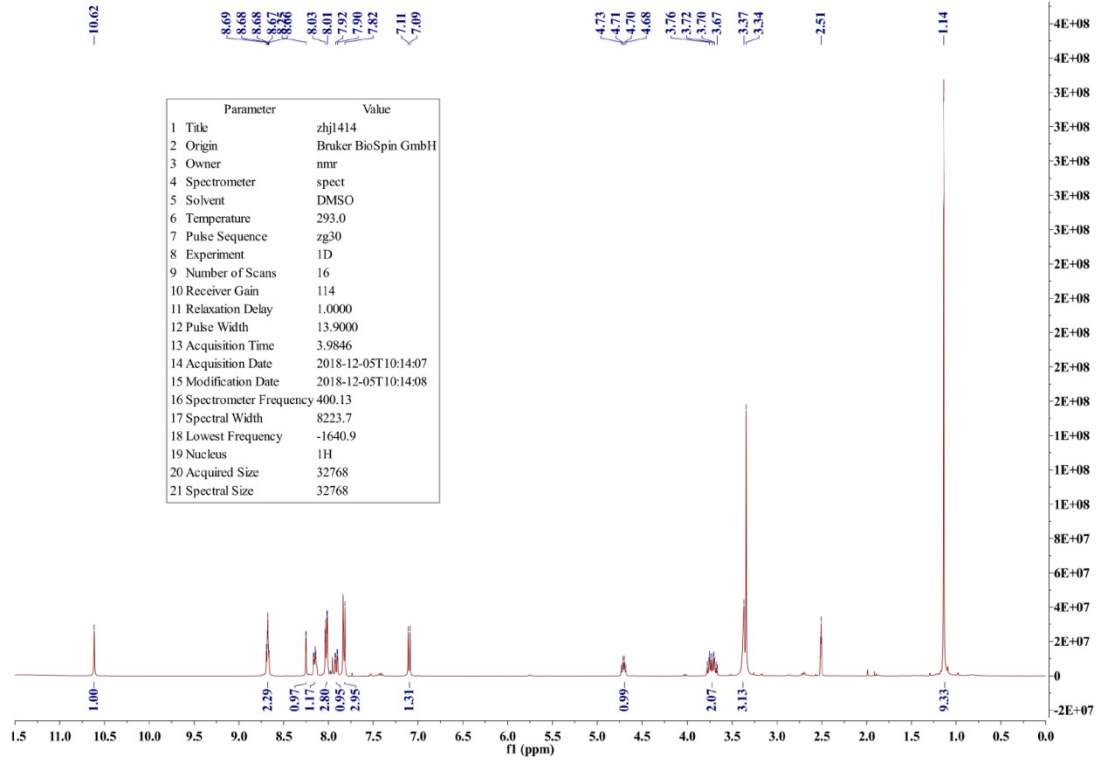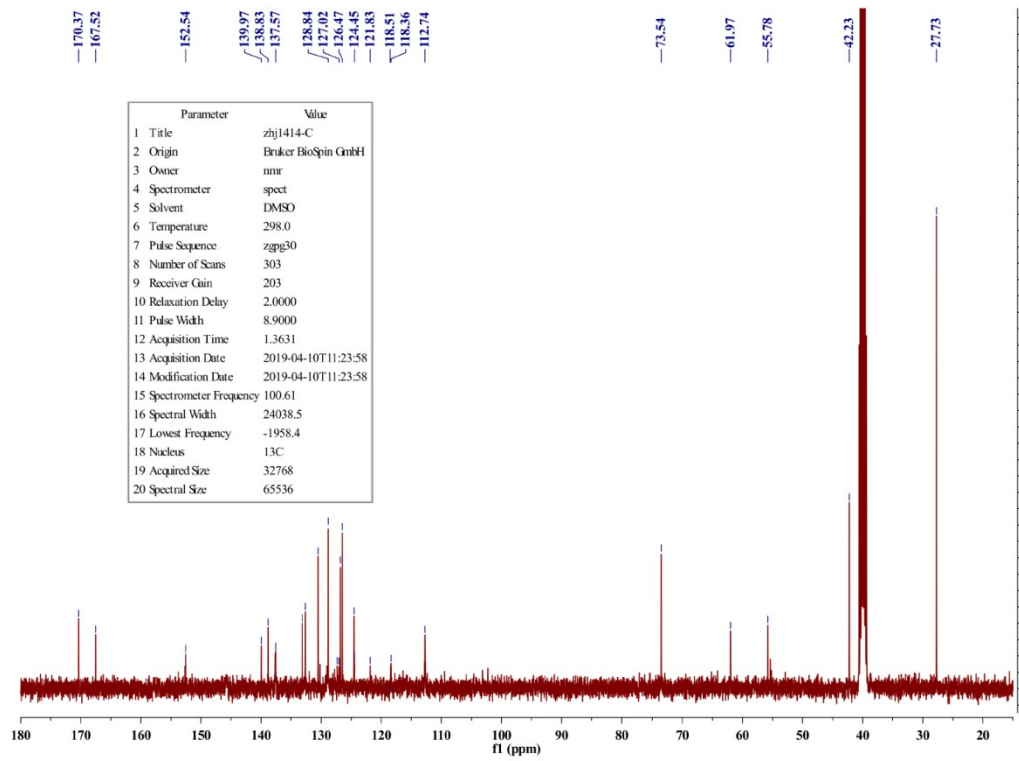

(S)-4-(6-acetamidopyridin-3-yl)-N-(3-(tert-butoxy)-1-((4-chloro-3-(trifluoromethyl)phenyl)amino)-1-oxopropan-2-yl)benzamide (BS4)

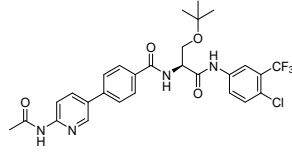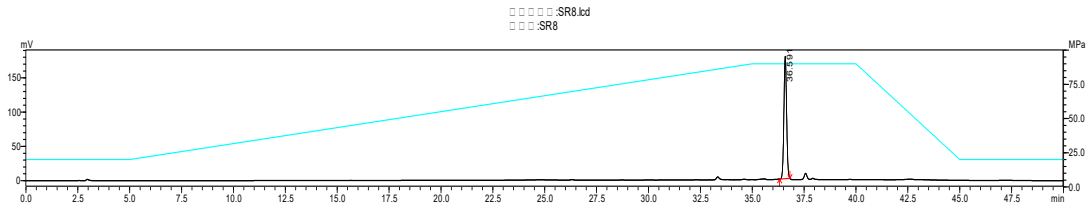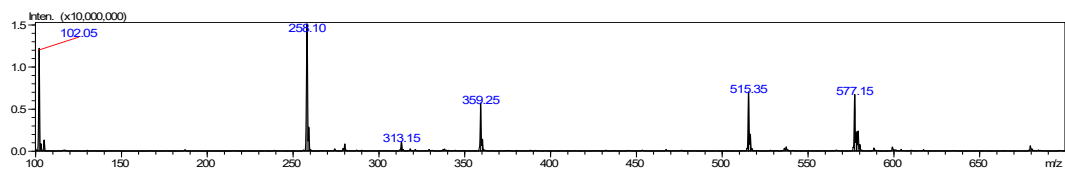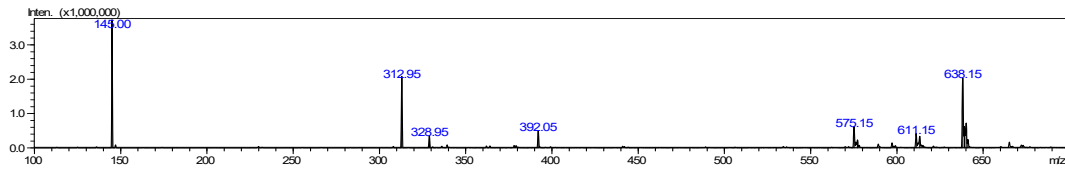

Item name: L-8  
Item description:

Channel name: 2: Average Time 0.3000 min : TOF MSe (50-2000) 6eV ESI+ : Centroided : Combined

6.27e7

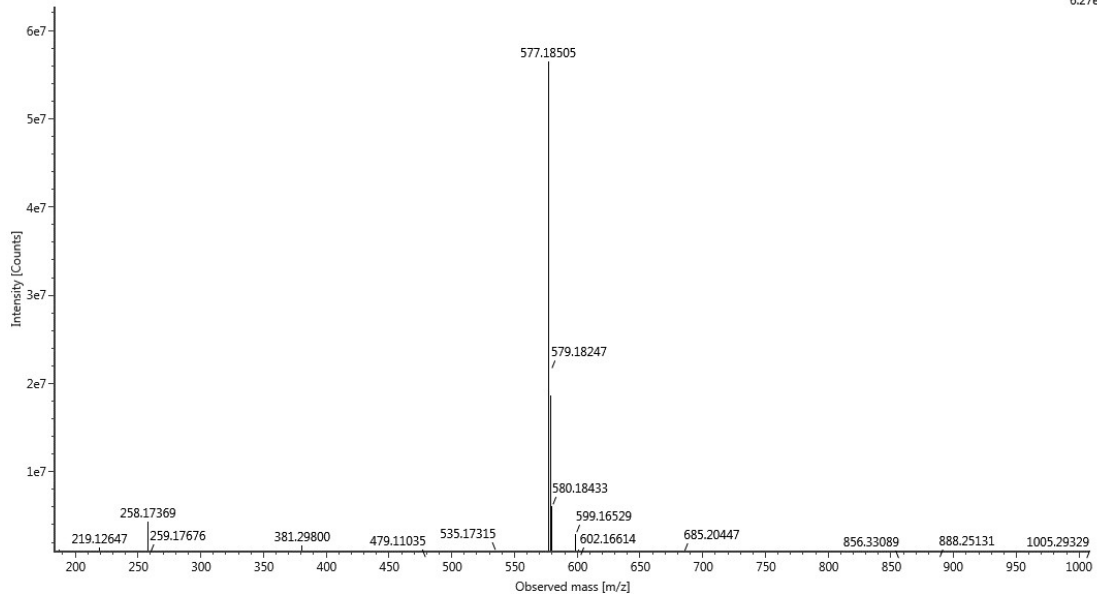

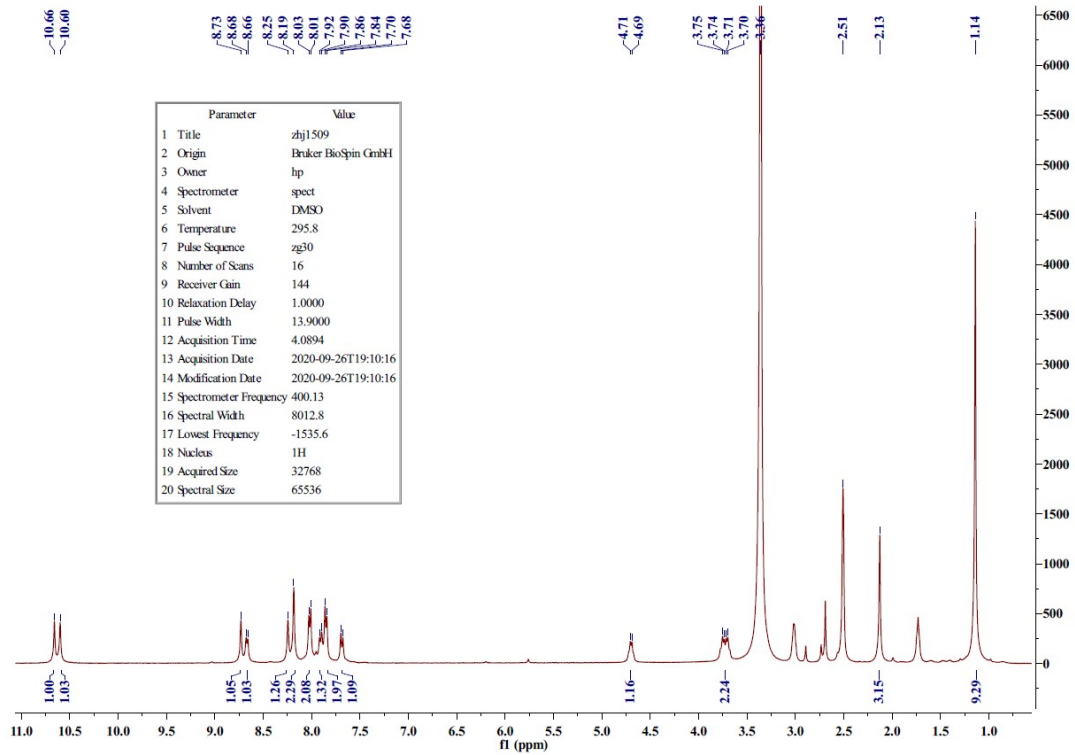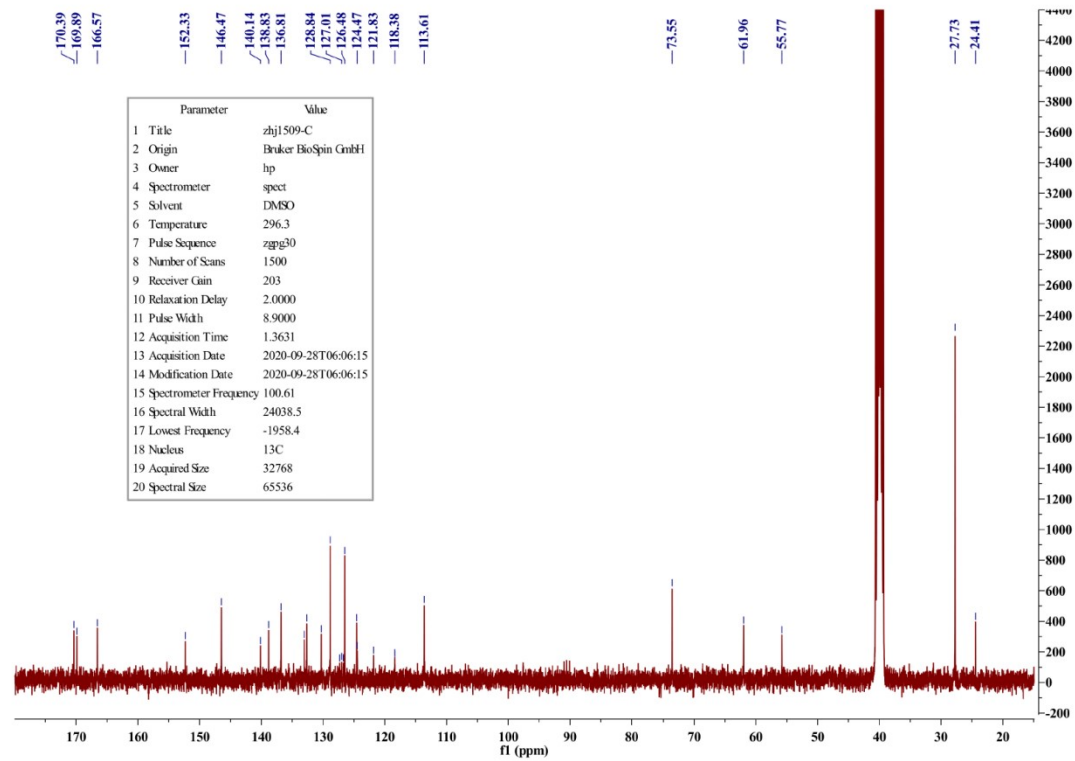

(S)-N-(3-(tert-butoxy)-1-((4-chloro-3-(trifluoromethyl)phenyl)amino)-1-oxopropan-2-yl)-4-(6-pivalamidopyridin-3-yl)benzamide (BS5)

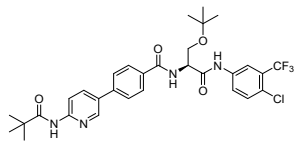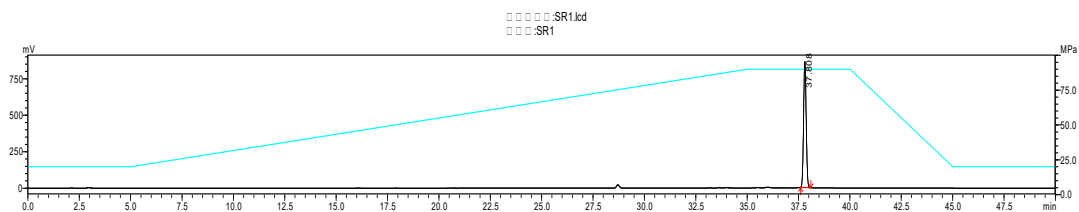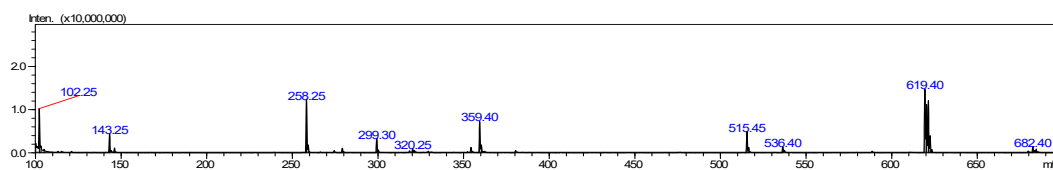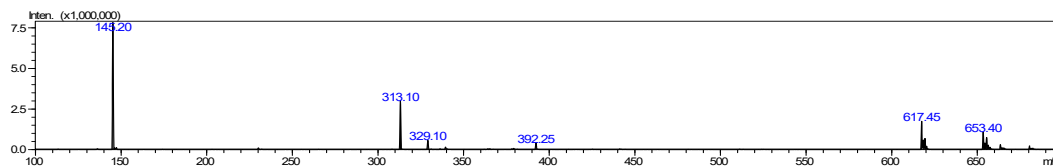

Item name: L-23  
Item description:

Channel name: 2: Average Time 0.2929 min : TOF MS (50-1500) 6eV ESI+ : Combined

1.59e7

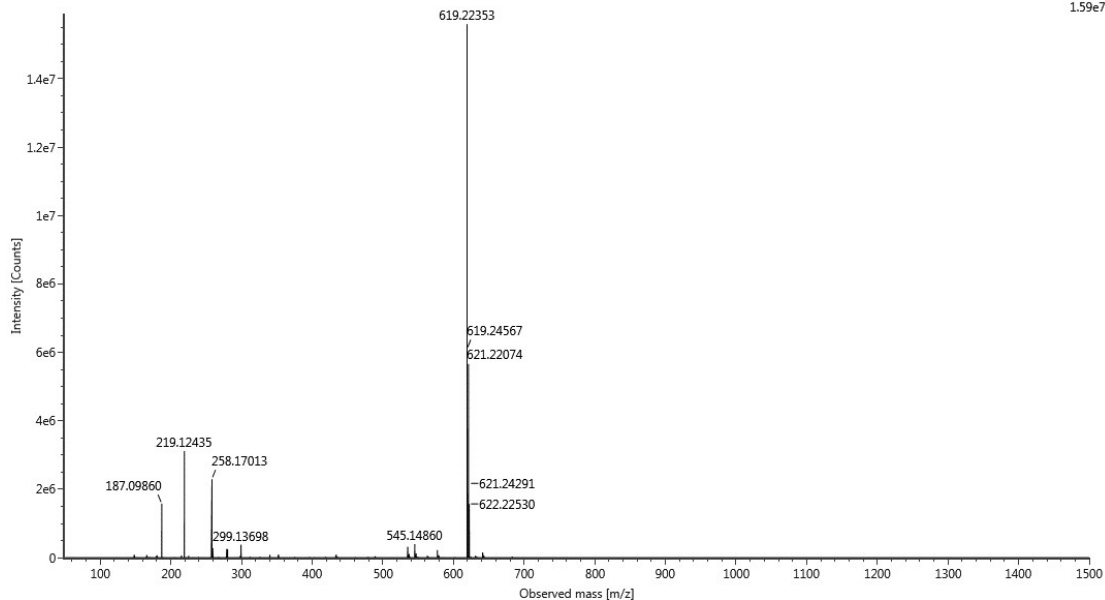

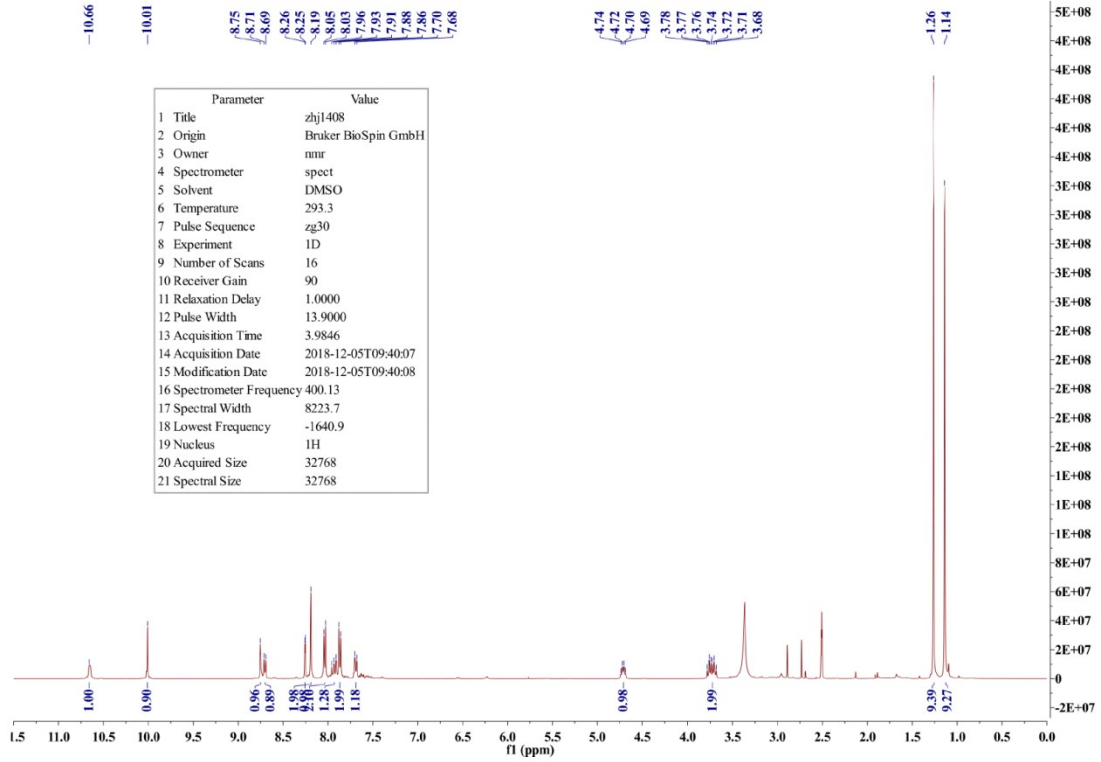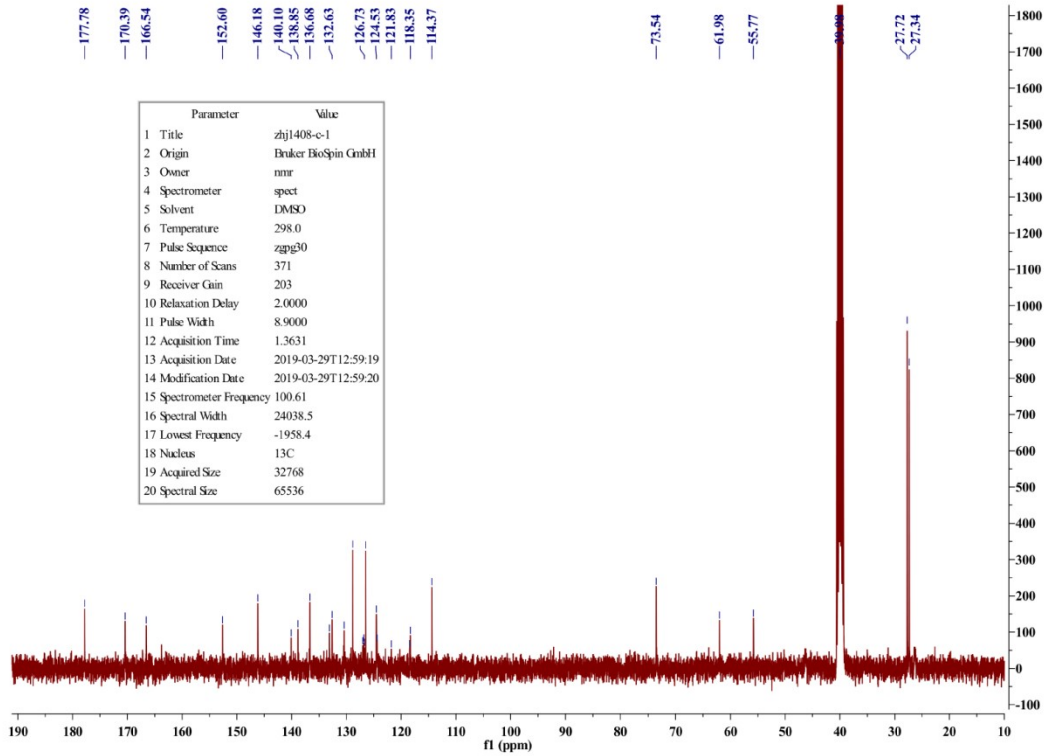



(S)-N-(3-(tert-butoxy)-1-((4-chloro-3-(trifluoromethyl)phenyl)amino)-1-oxopropan-2-yl)-4-(6-(cyclopropanecarboxamido)pyridin-3-yl)benzamide ( **BS6** )

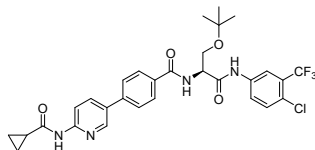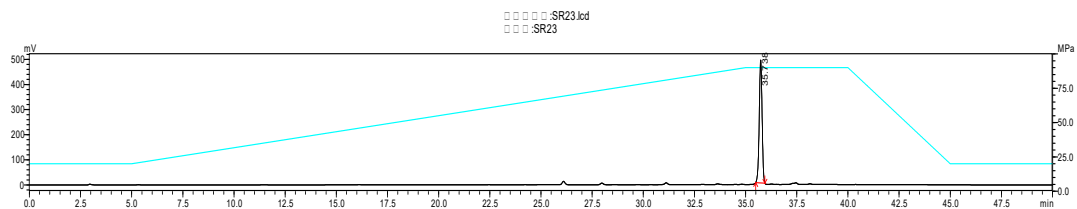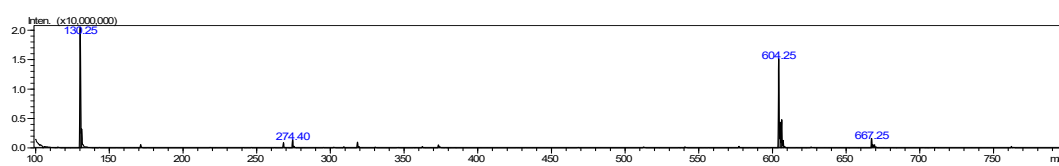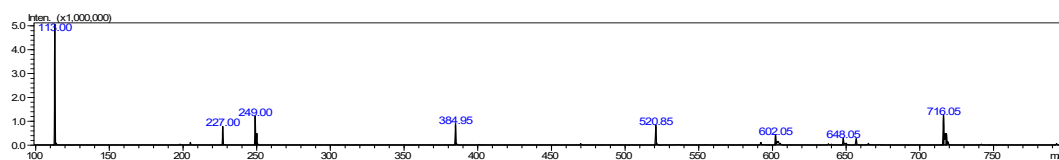

Item name: L5  
Item description:

Channel name: 2: Average Time 0.1839 min : TOF MSe (50-2000) 6eV ESI+ : Centroided : Combined

1.01e7

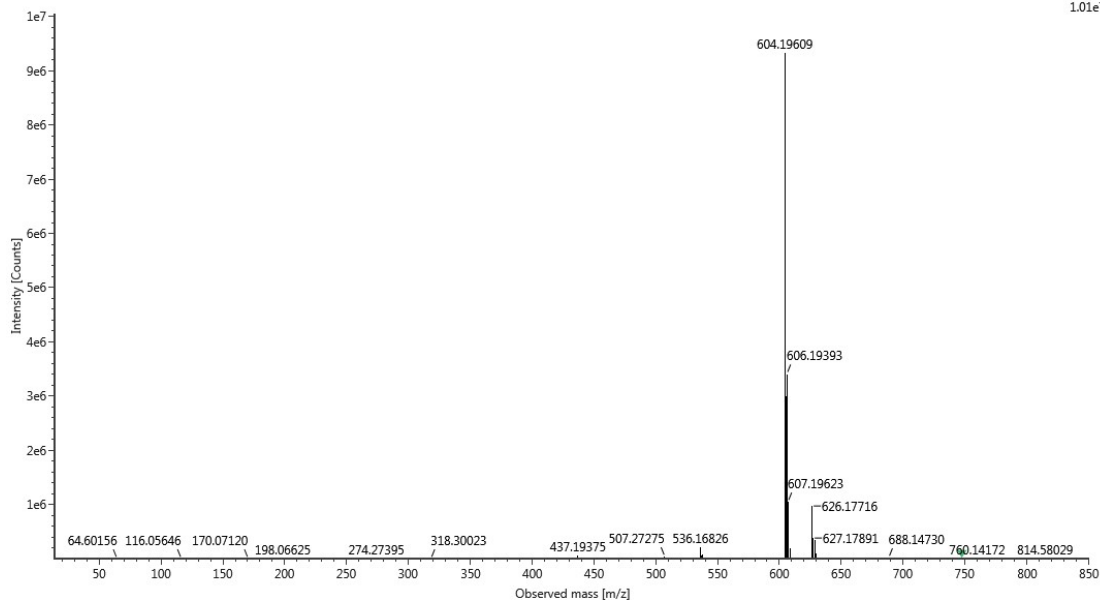

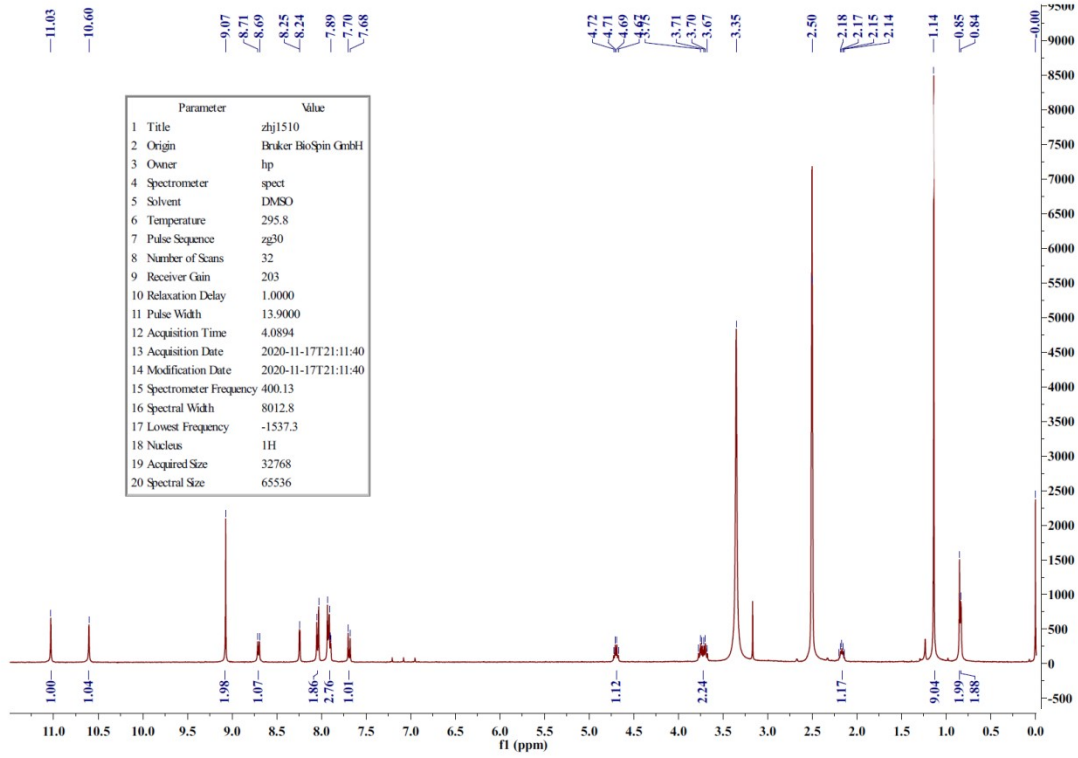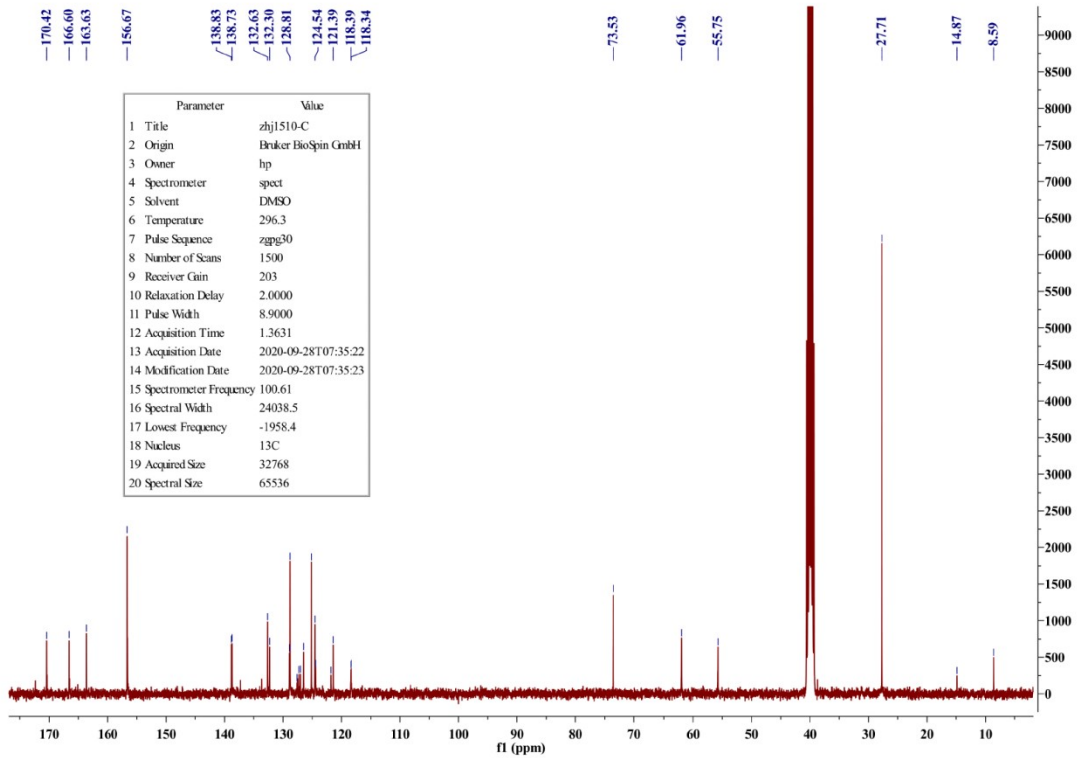

(S)-4-(6-aminopyridin-3-yl)-N-(3-(tert-butoxy)-1-((4-chloro-3-(trifluoromethyl)phenyl)amino)-1-oxopropan-2-yl)benzamide (BS7)

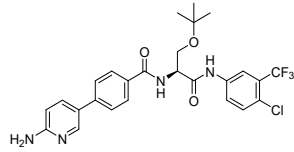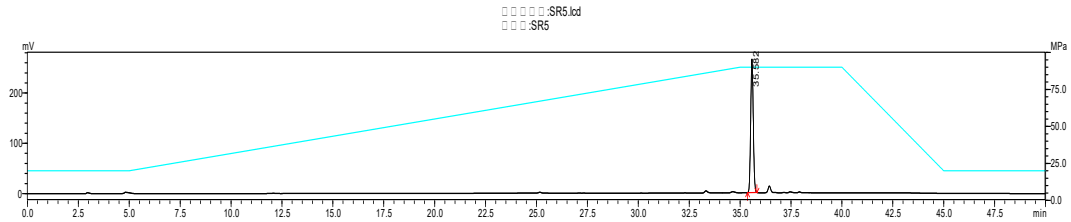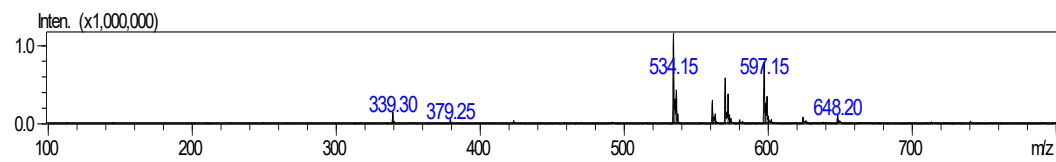

Item name: L-24  
Item description:

Channel name: 2: Average Time 0.2317 min : TOF MS (50-1500) 6eV ESI+ : Combined

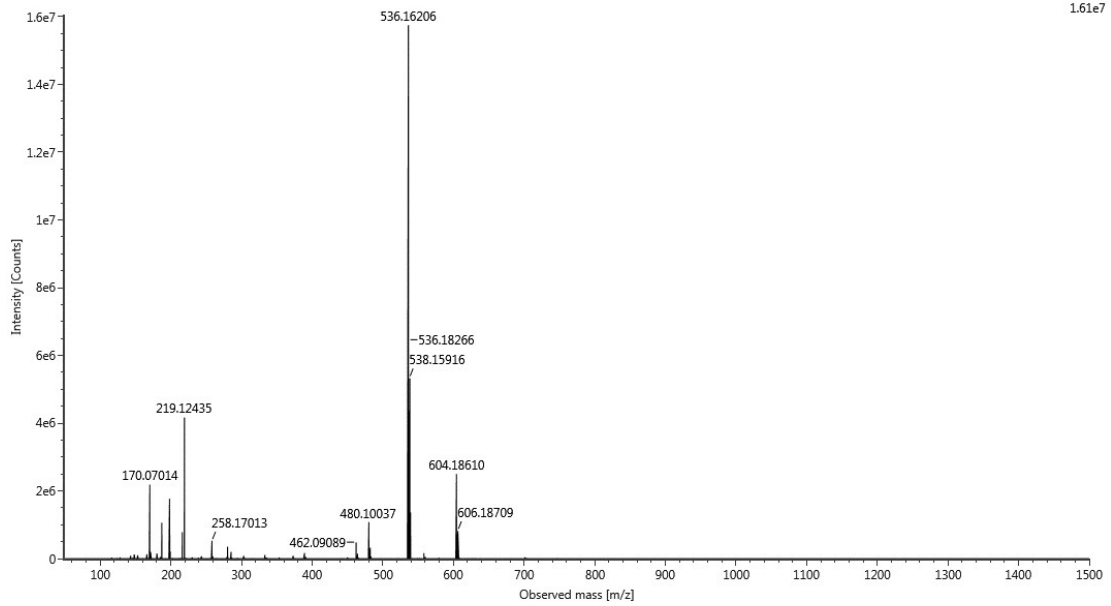

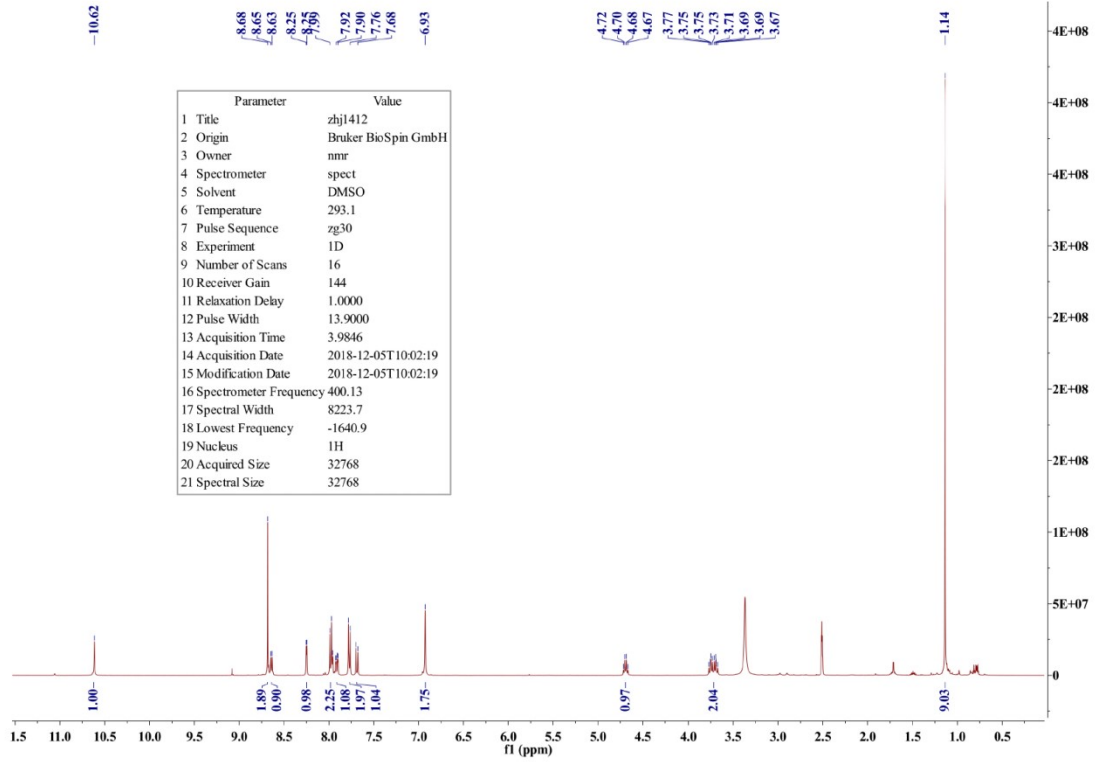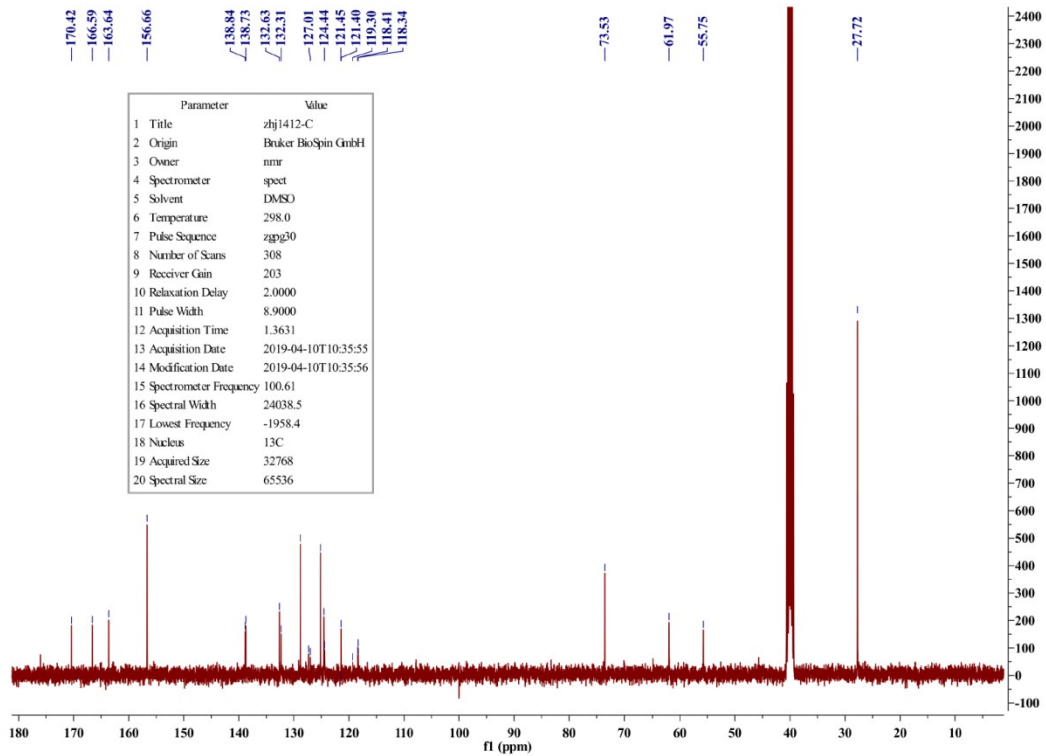

(S)-5-(3-((3-(tert-butoxy)-1-((4-chloro-3-(trifluoromethyl)phenyl)amino)-1-oxopropan-2-yl)carbamoyl)phenyl)-N,N-diethylnicotinamide (BS8)

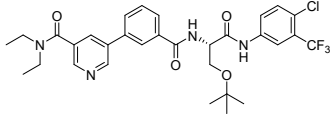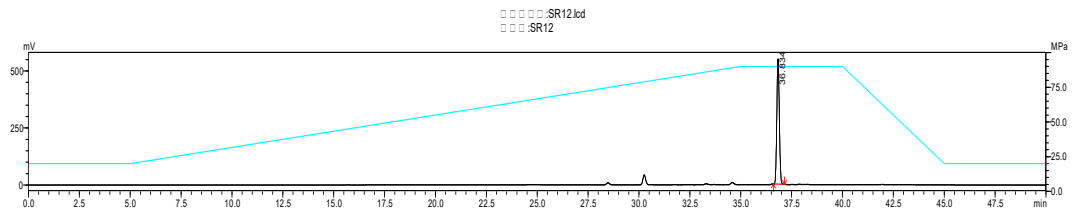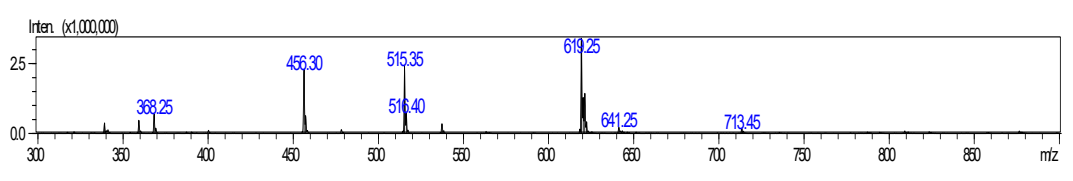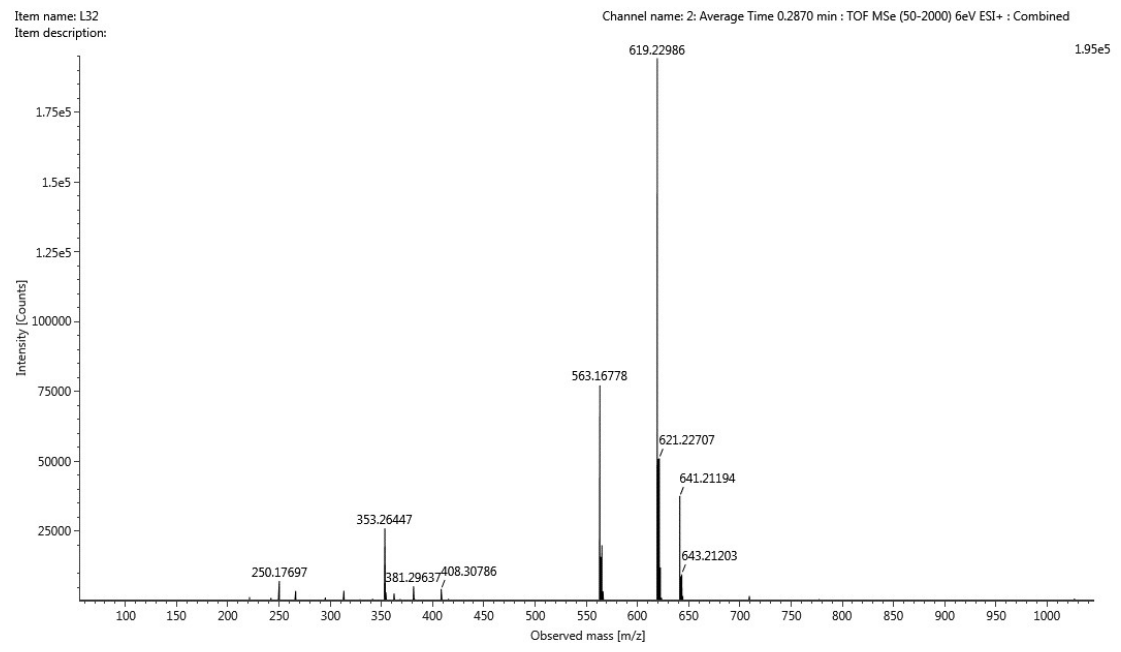

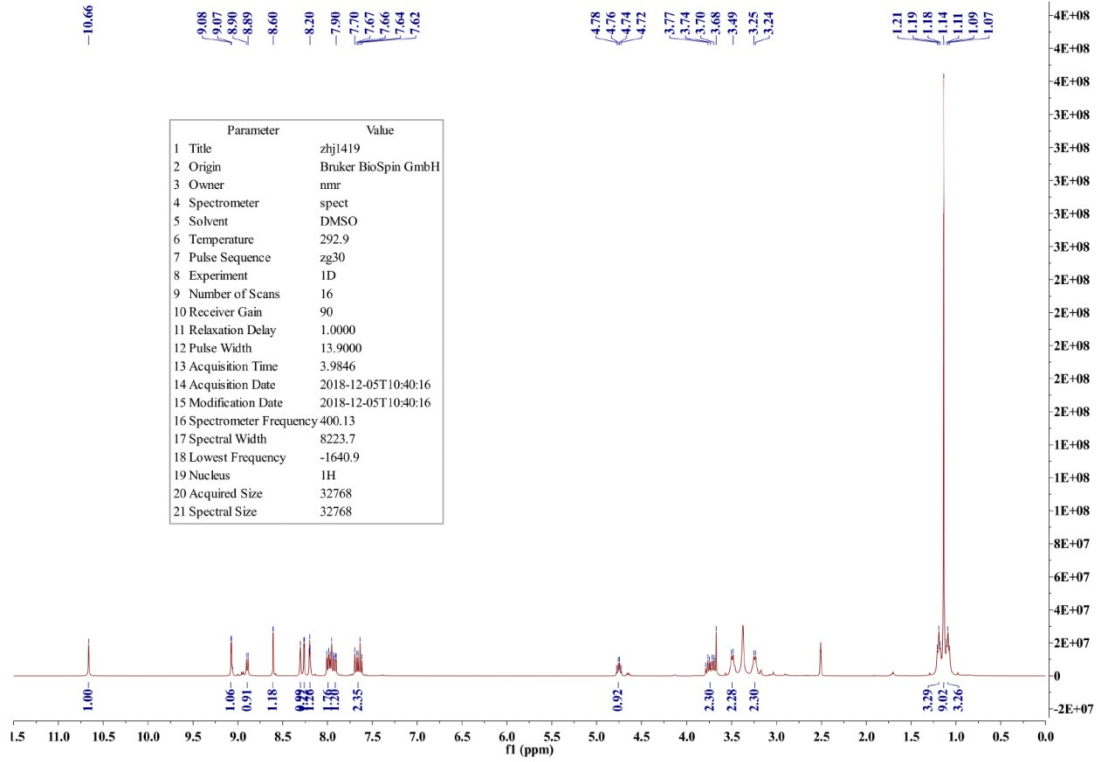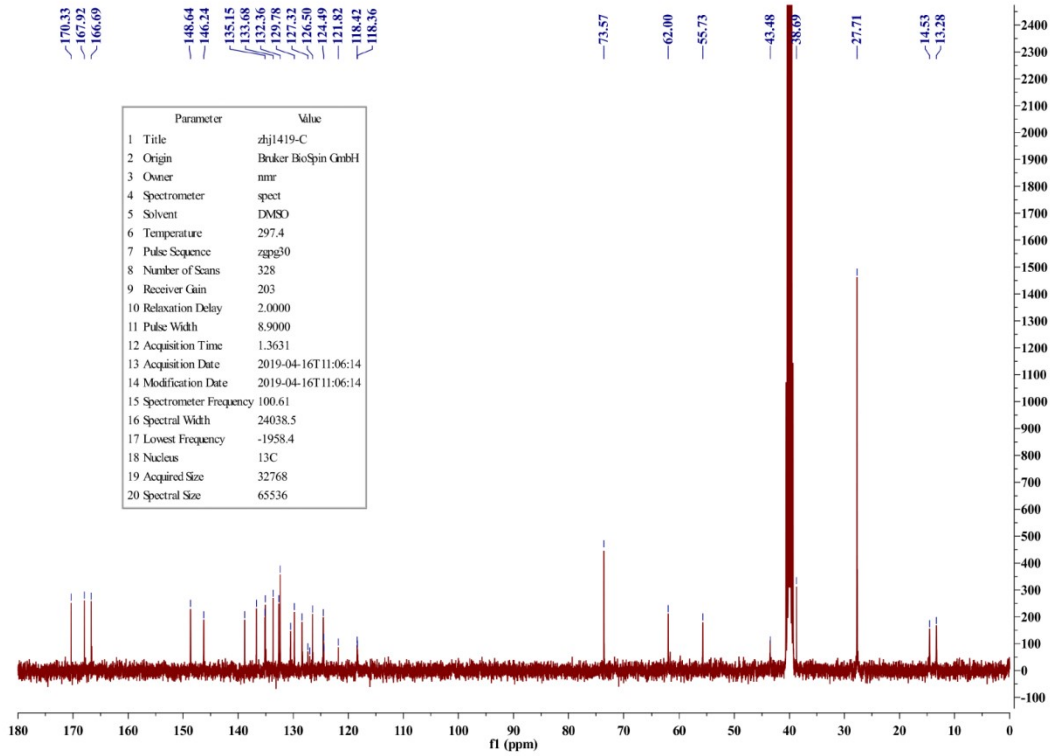

(S)-5-(3-((3-(tert-butoxy)-1-((4-chloro-3-(trifluoromethyl)phenyl)amino)-1-oxopropan-2-yl)carbamoyl)phenyl)-N-cyclopropylnicotinamide (BS9)

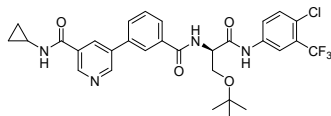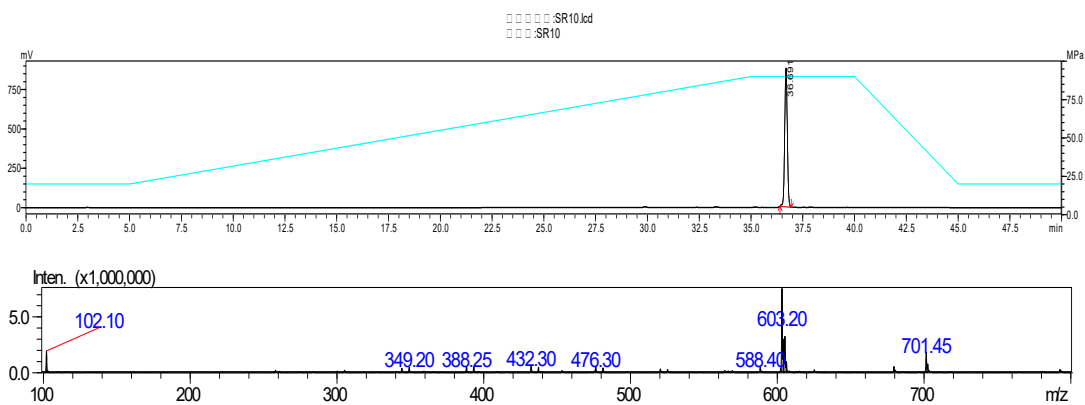

Item name: L-33  
Item description:

Channel name: 2: Average Time 0.3013 min : TOF MS (50-1500) 6eV ESI+ : Combined

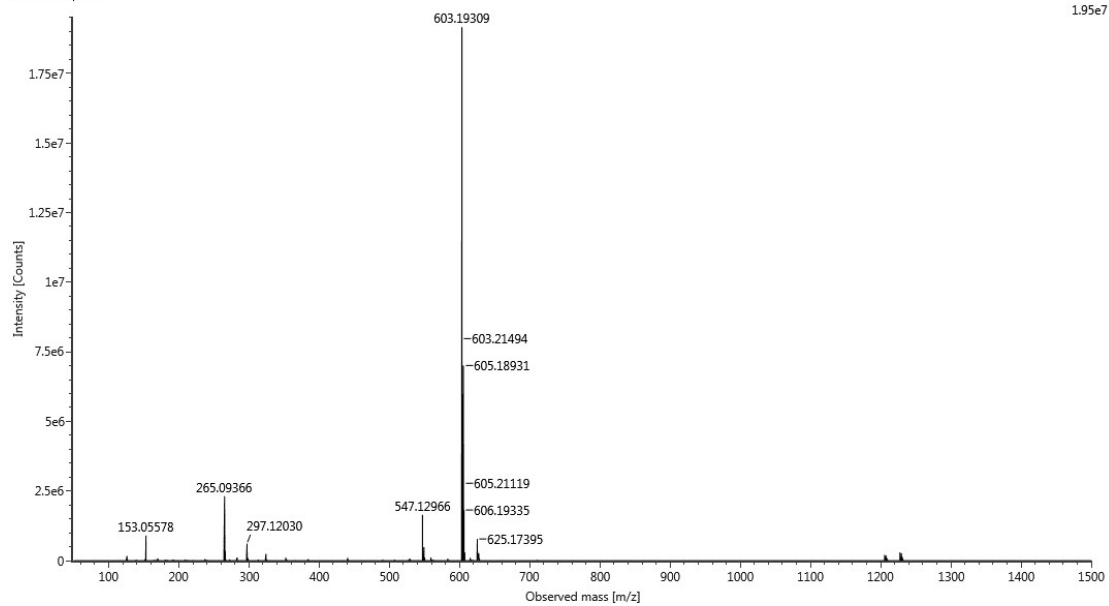

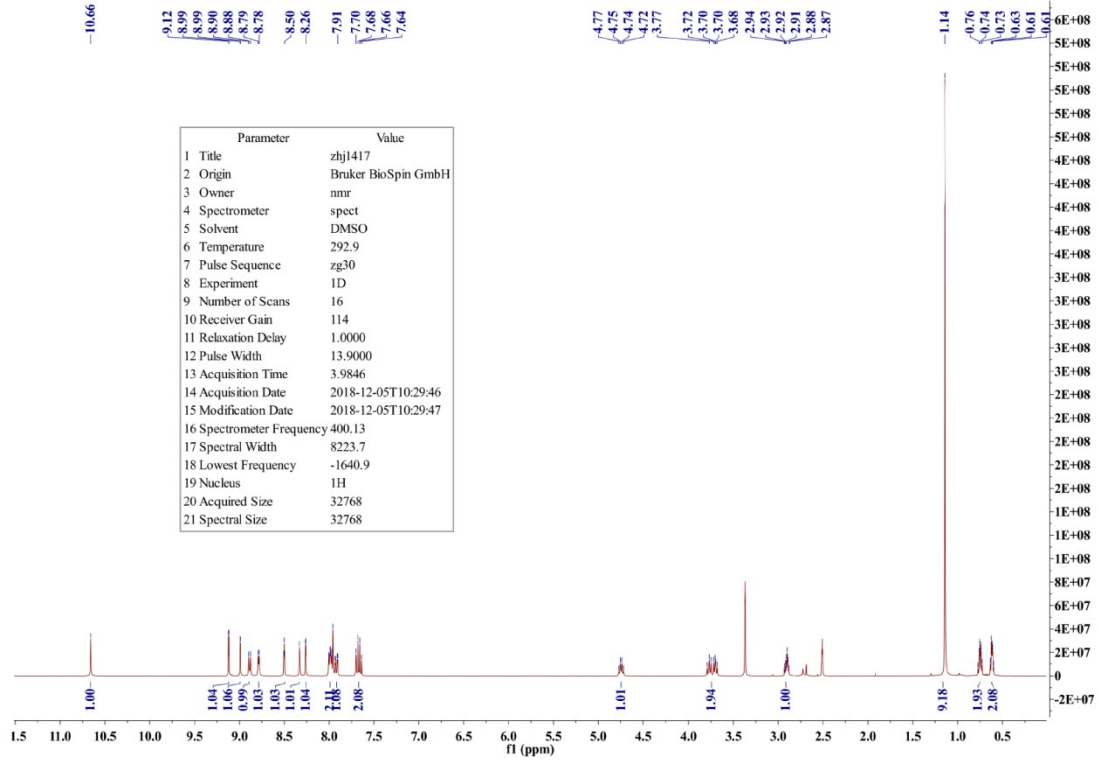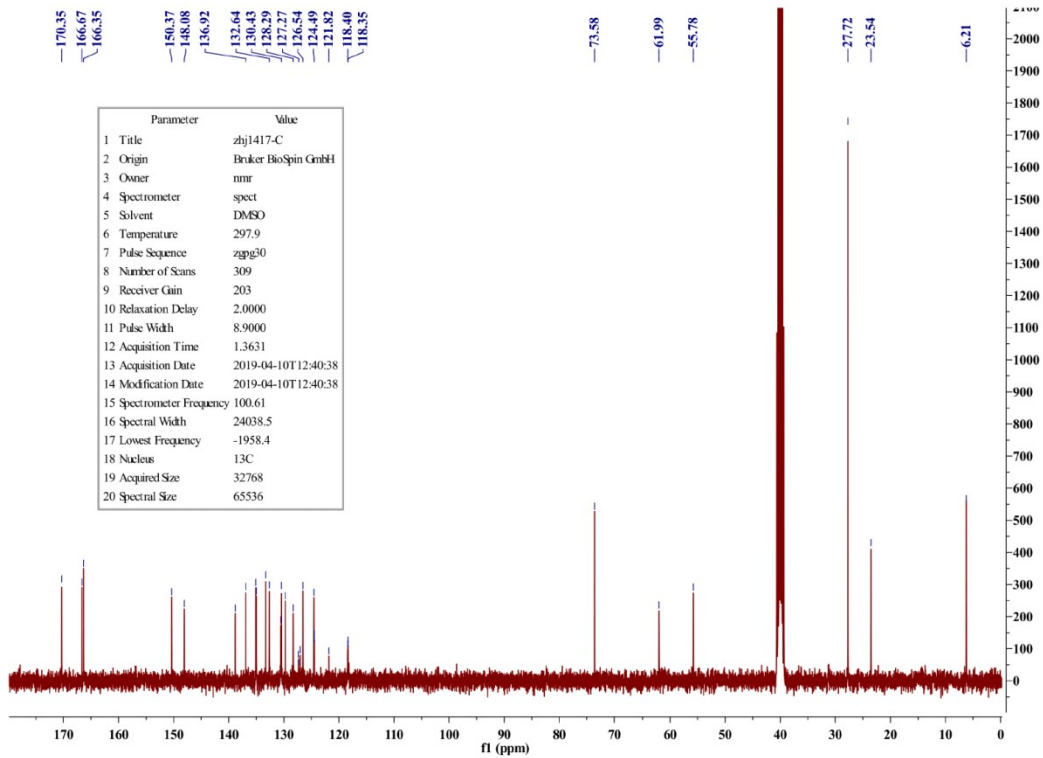



(S)-N-(3-(tert-butoxy)-1-((4-chloro-3-(trifluoromethyl)phenyl)amino)-1-oxopropan-2-yl)-3-(6-(methylsulfonamido)pyridin-3-yl)benzamide (BS10)

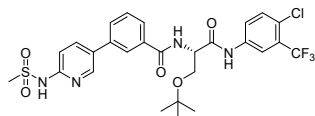

SR6.td  
SR6

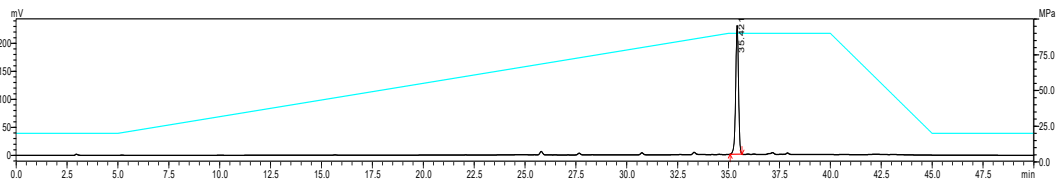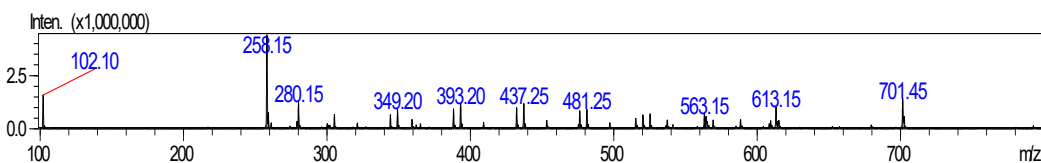

Item name: L-31  
Item description:

Channel name: 2: Average Time 0.2736 min : TOF MS (50-1500) 6eV ESI+ : Combined

9.27e6

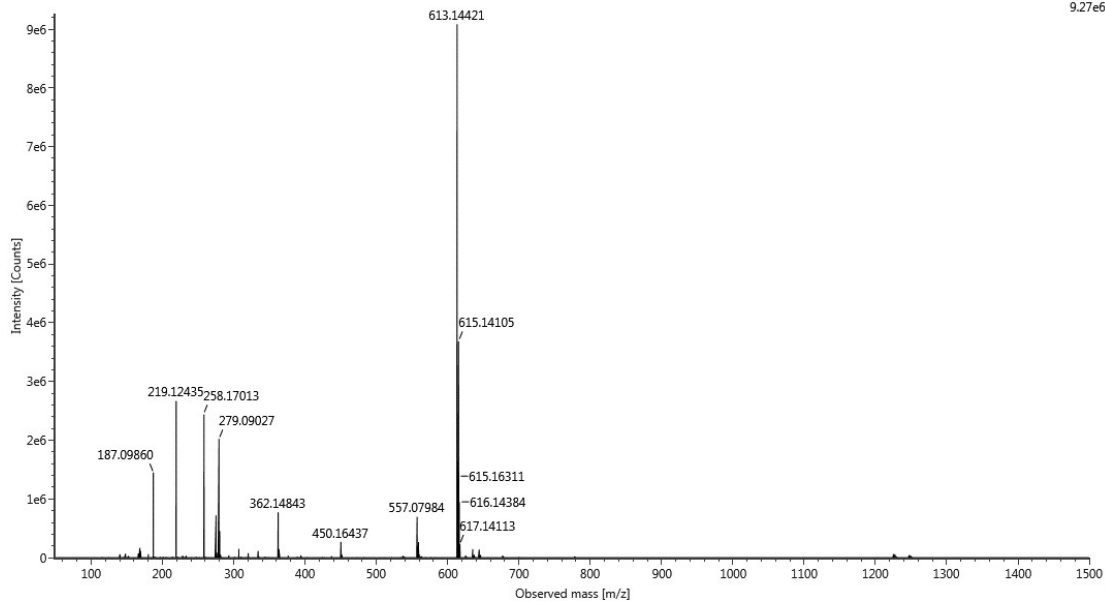

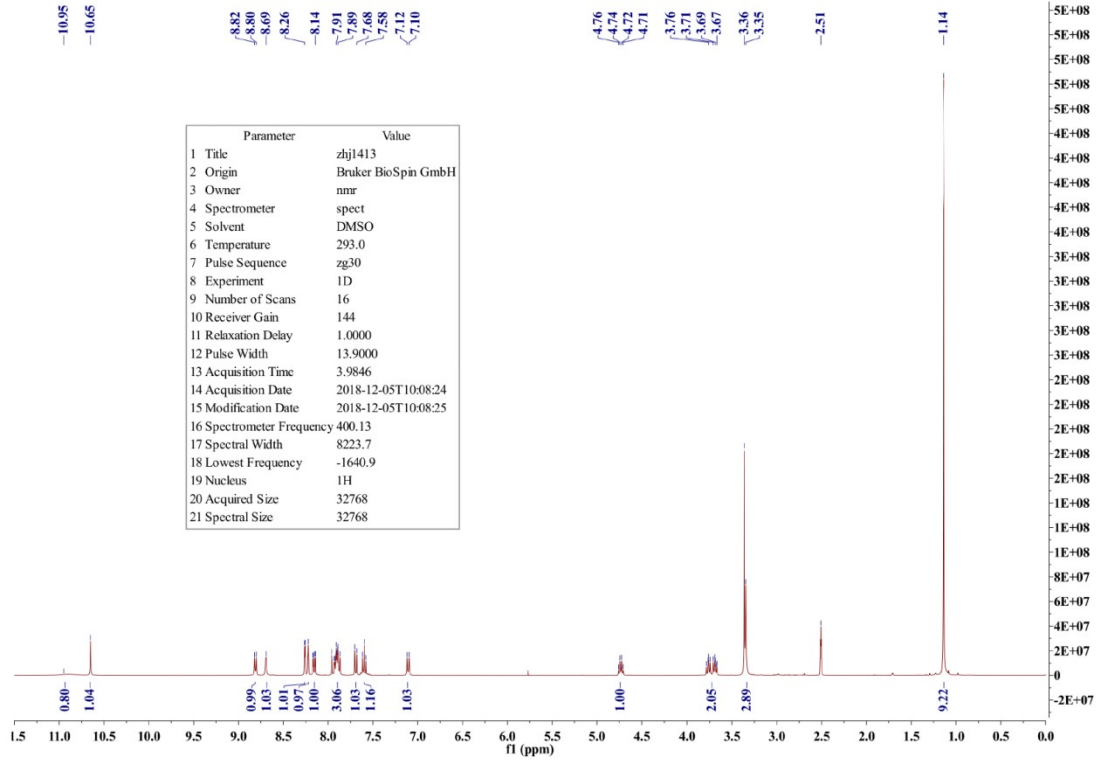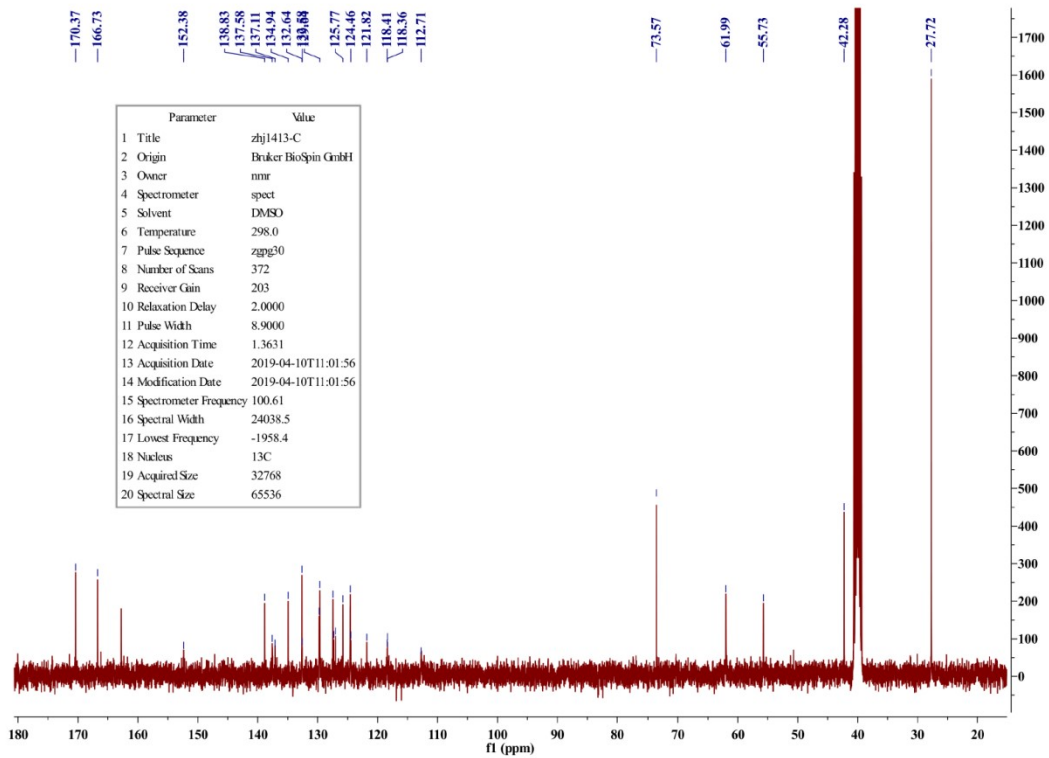

(S)-3-(6-acetamidopyridin-3-yl)-N-(3-(tert-butoxy)-1-((4-chloro-3-(trifluoromethyl)phenyl)amino)-1-oxopropan-2-yl)benzamide (BS11)

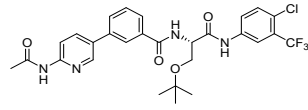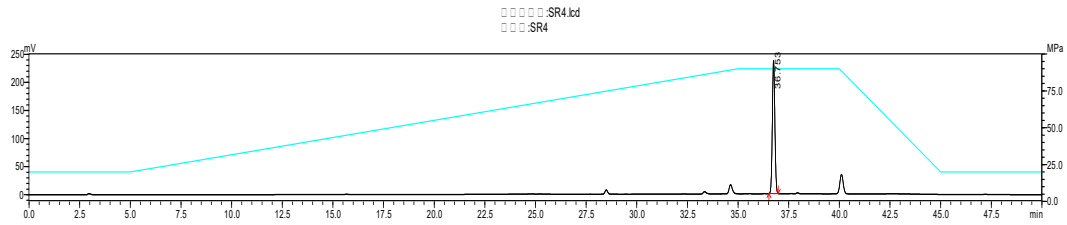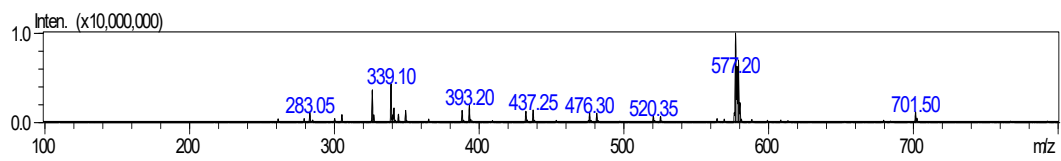

Item name: L-34  
Item description:

Channel name: 2: Average Time 0.3097 min : TOF MS (50-1500) 6eV ESI+ : Combined

2.34e7

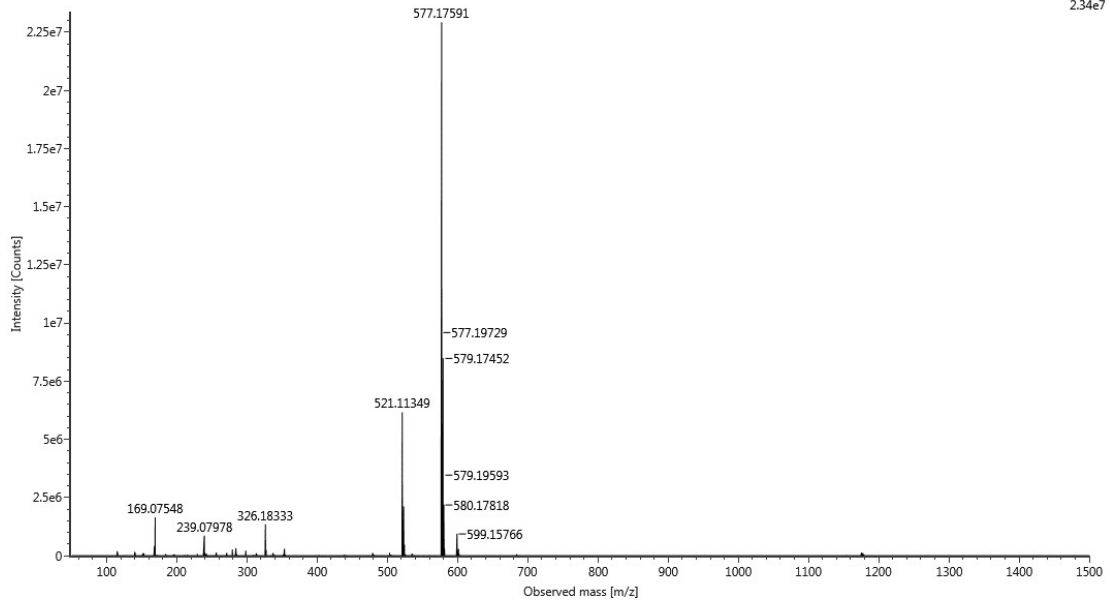

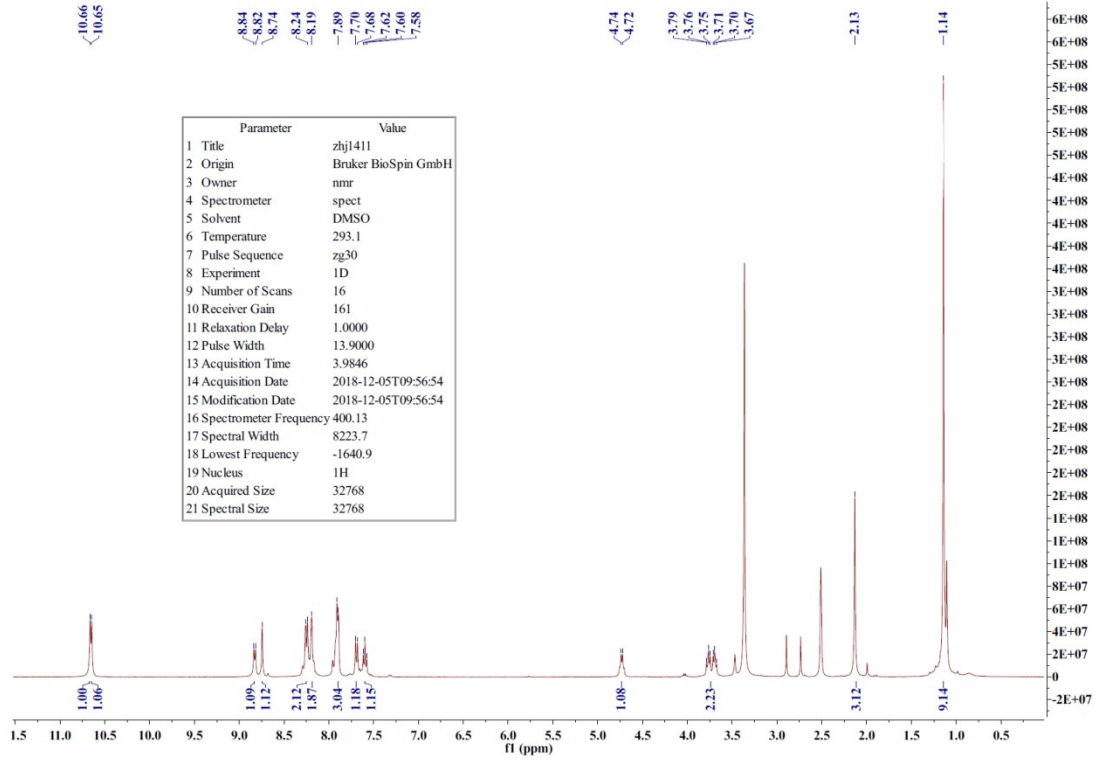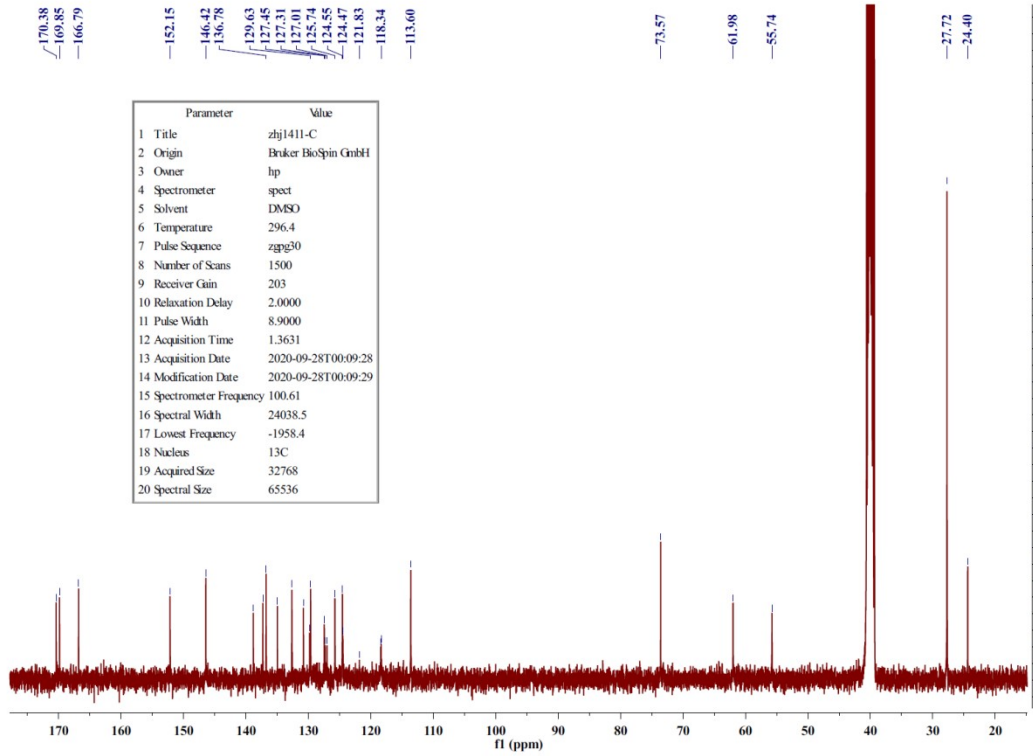

(S)-N-(3-(tert-butoxy)-1-((4-chloro-3-(trifluoromethyl)phenyl)amino)-1-oxopropan-2-yl)-3-(6-pivalamidopyridin-3-yl)benzamide (BS12)

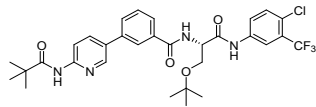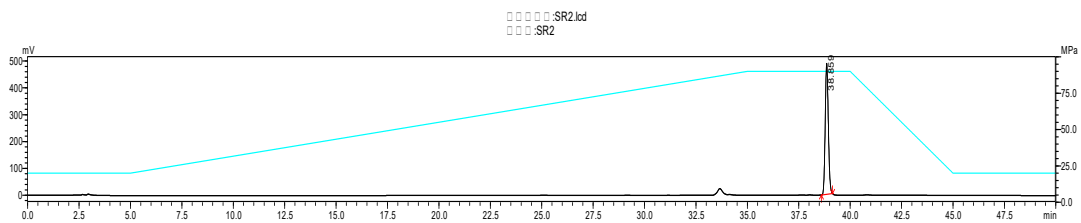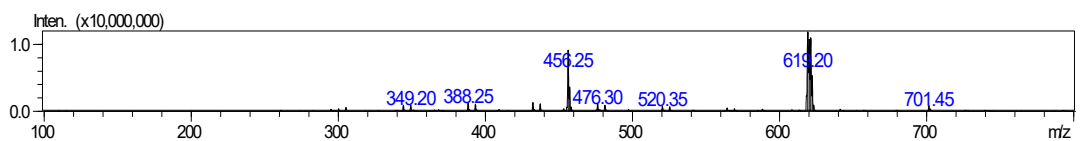

Item name: L-2  
Item description:

Channel name: 2: Average Time 0.2080 min : TOF MSe (50-2000) 6eV ESI+ : Centroided : Combined

9.06e7

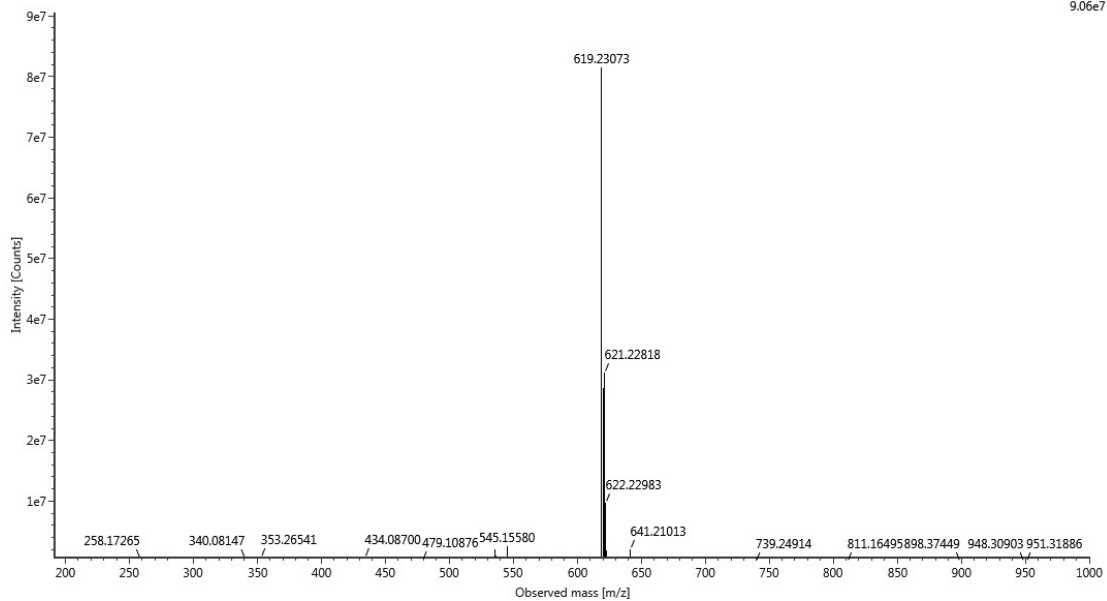

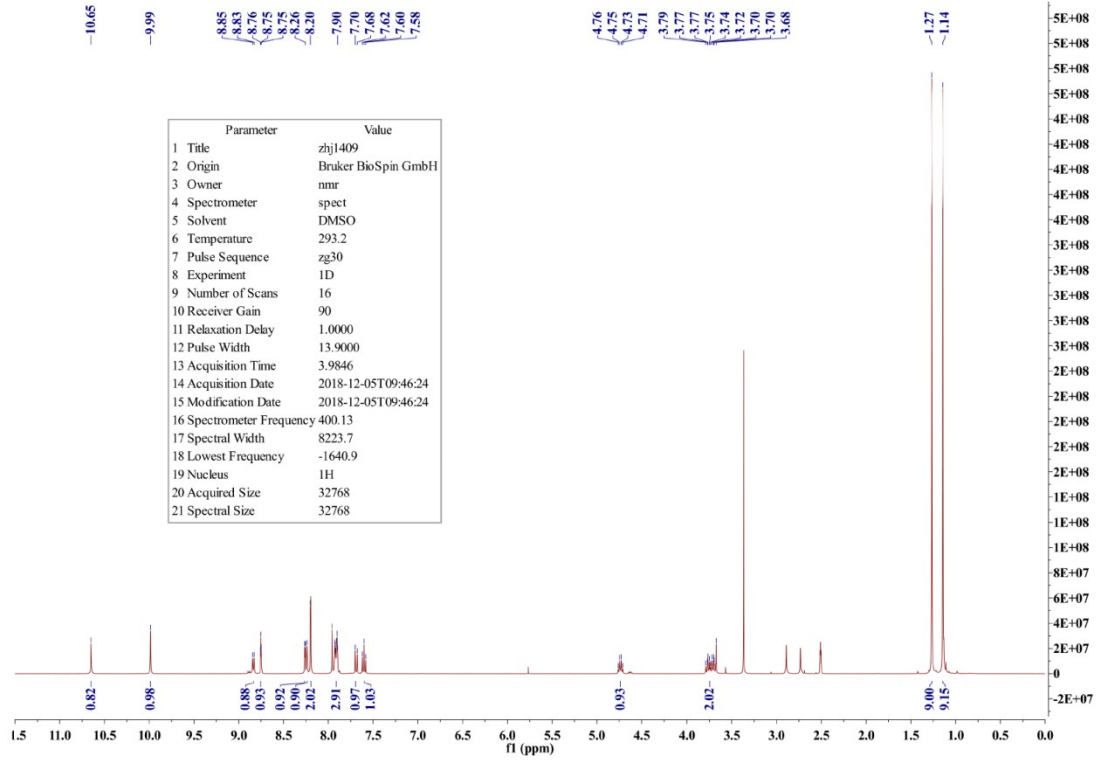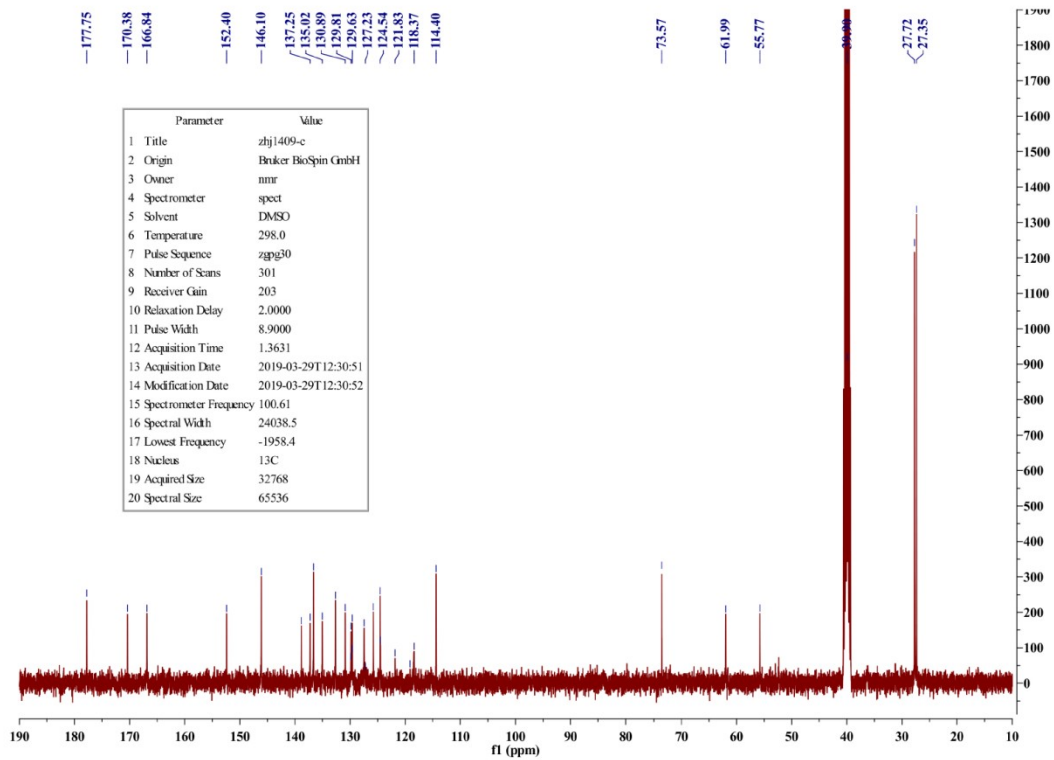

(S)-N-(3-(tert-butoxy)-1-((4-chloro-3-(trifluoromethyl)phenyl)amino)-1-oxopropan-2-yl)-3-(6-(cyclopropanecarboxamido)pyridin-3-yl)benzamide (BS13)

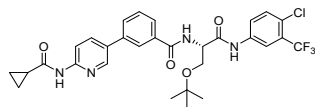

SR3.td  
SR3

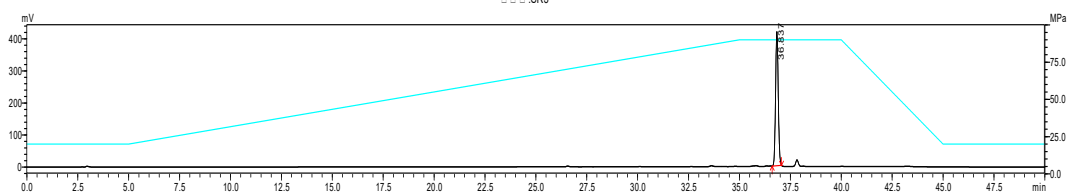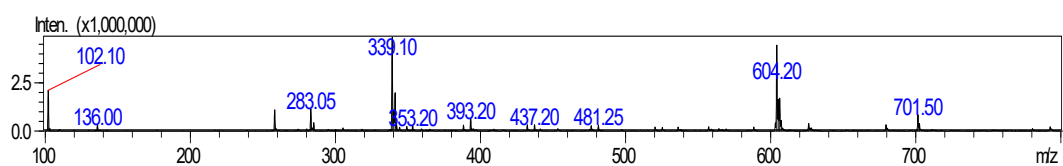

Item name: L-21  
Item description:

Channel name: 2: Average Time 0.3183 min : TOF MS (50-1500) 6eV ESI+ : Combined

2.88e7

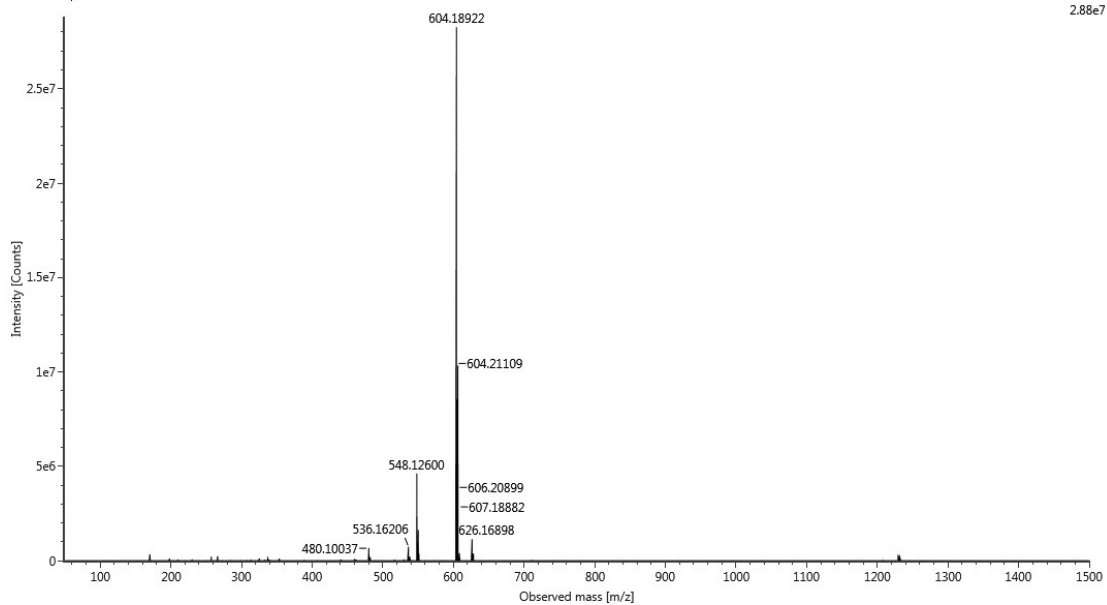

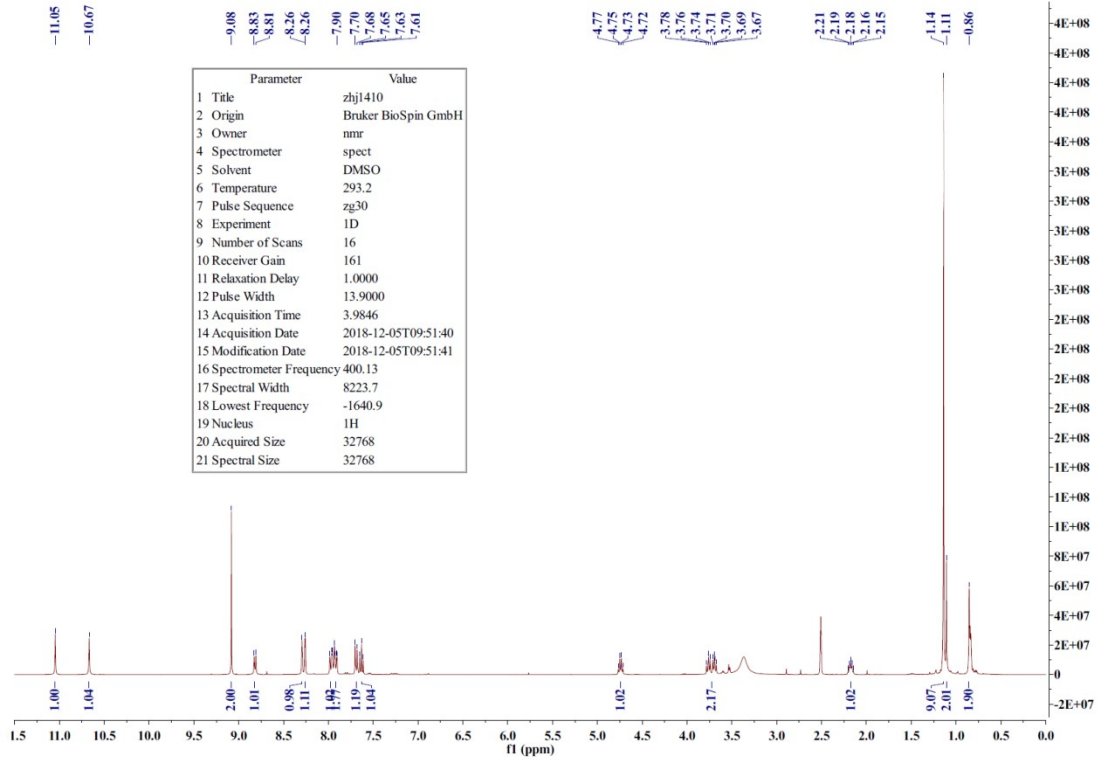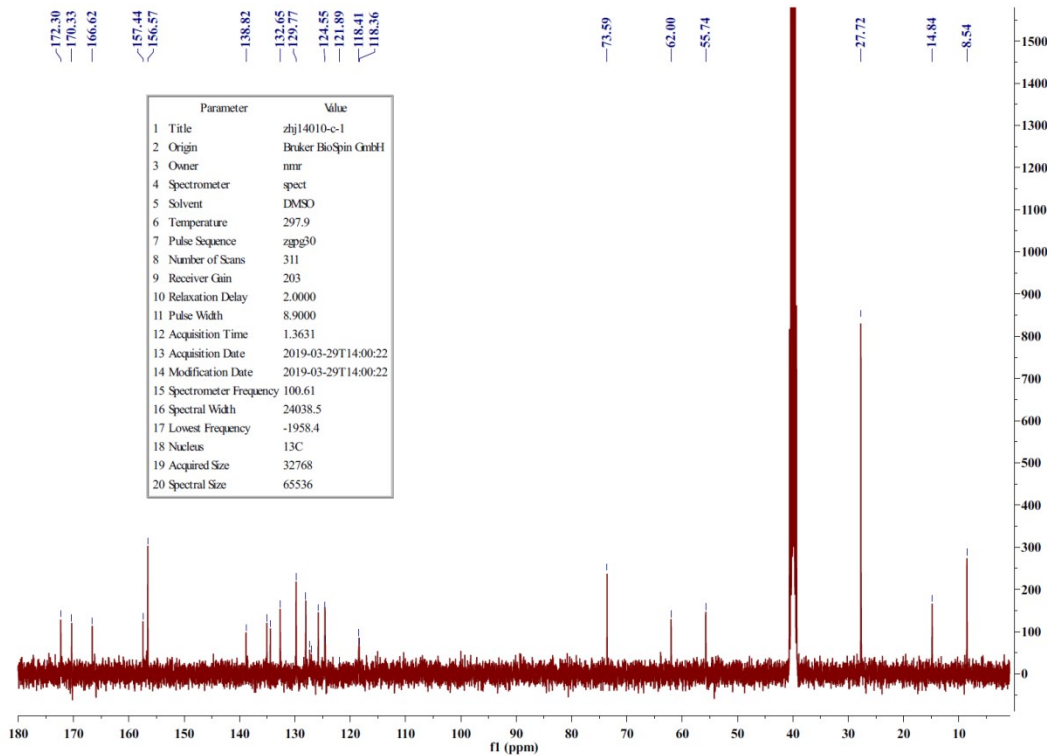



(S)-3-(6-aminopyridin-3-yl)-N-(3-(tert-butoxy)-1-((4-chloro-3-(trifluoromethyl)phenyl)amino)-1-oxopropan-2-yl)benzamide (BS14)

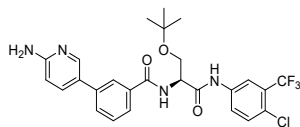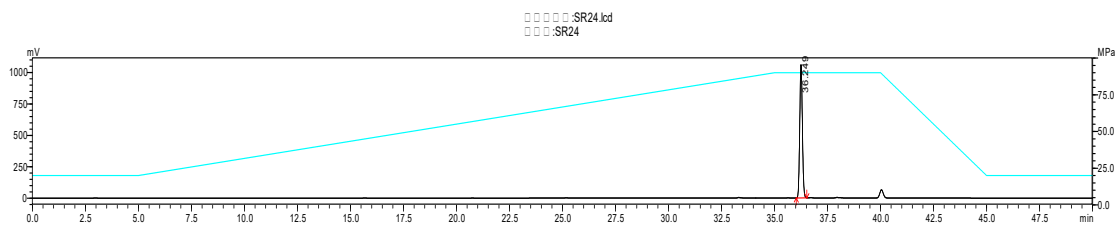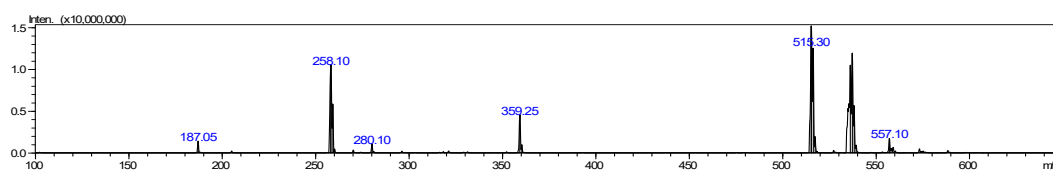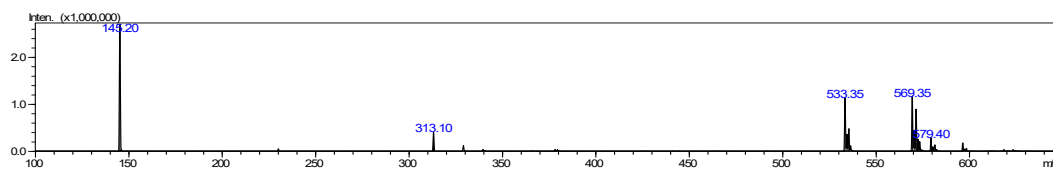

Item name: L3  
Item description:

Channel name: 2: Average Time 0.1701 min : TOF MSe (50-2000) 6eV ESI+ : Combined

1.01e7

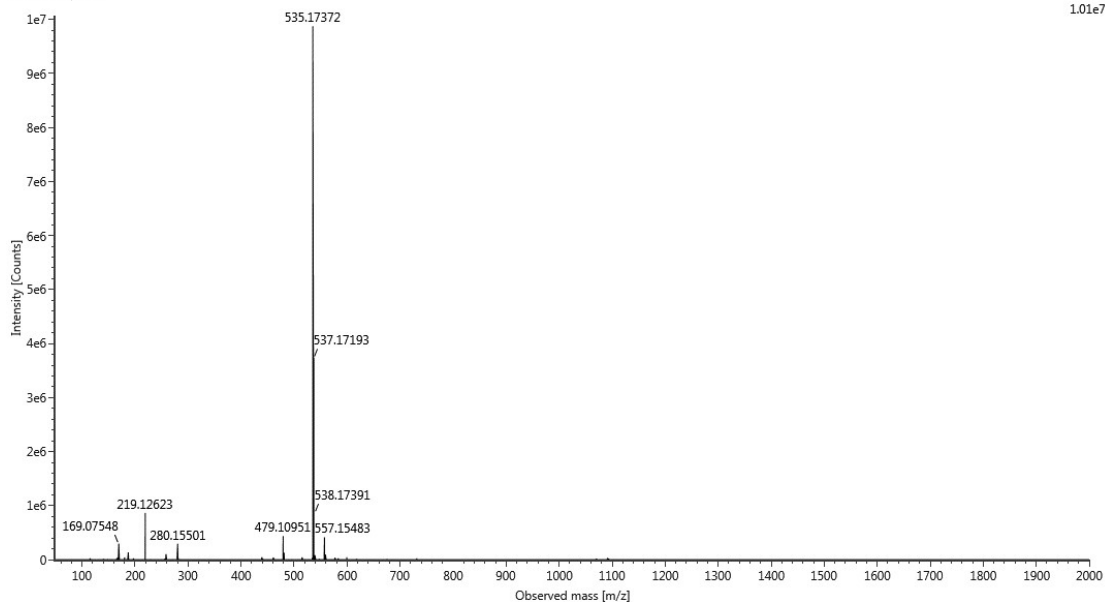

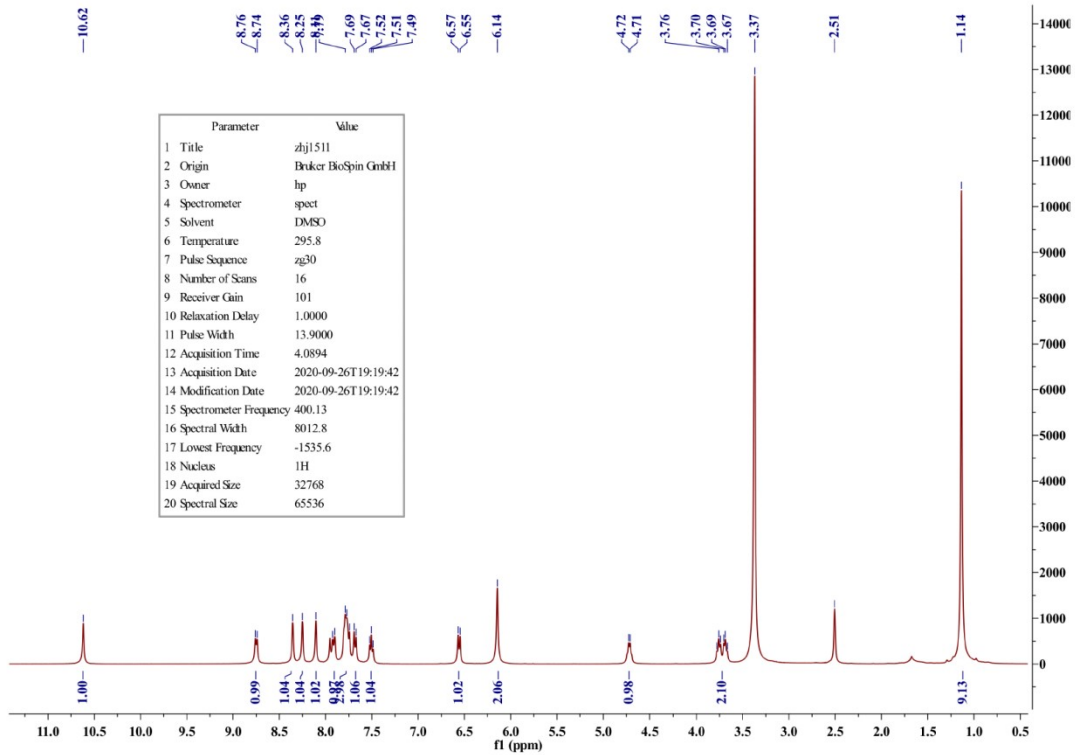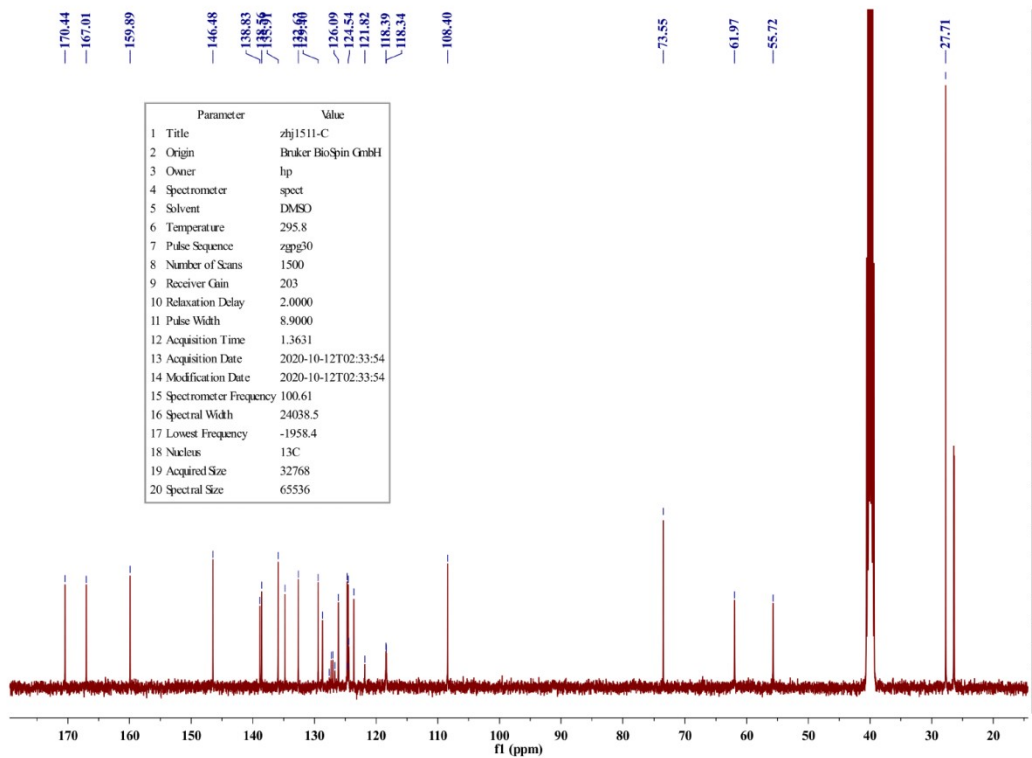

(S)-5-(4-((1-((4-chloro-3-(trifluoromethyl)phenyl)amino)-3-hydroxy-1-oxopropan-2-yl)carbamoyl)phenyl)-N,N-diethylnicotinamide (SR1)

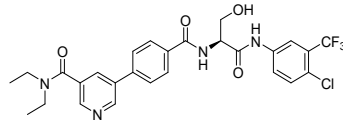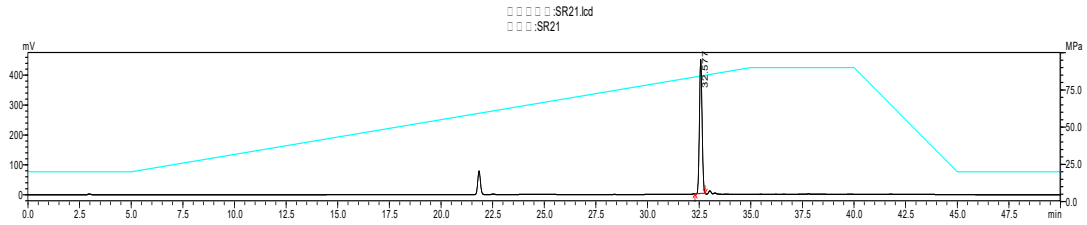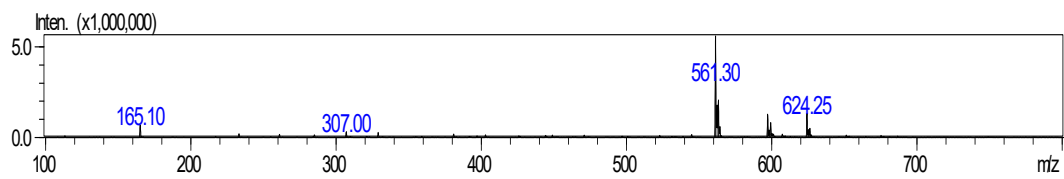

Item name: L39  
Item description:

563.02905 Channel name: 2: Average Time 0.1463 min : TOF MS (50-3000) 6eV ESI+ : Combined

6.86e7

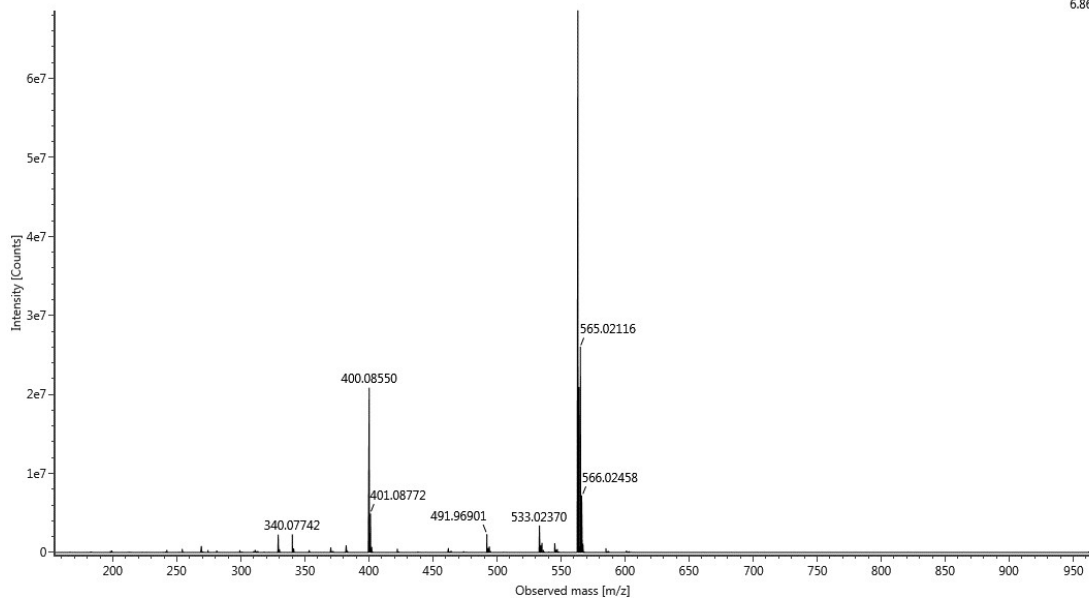

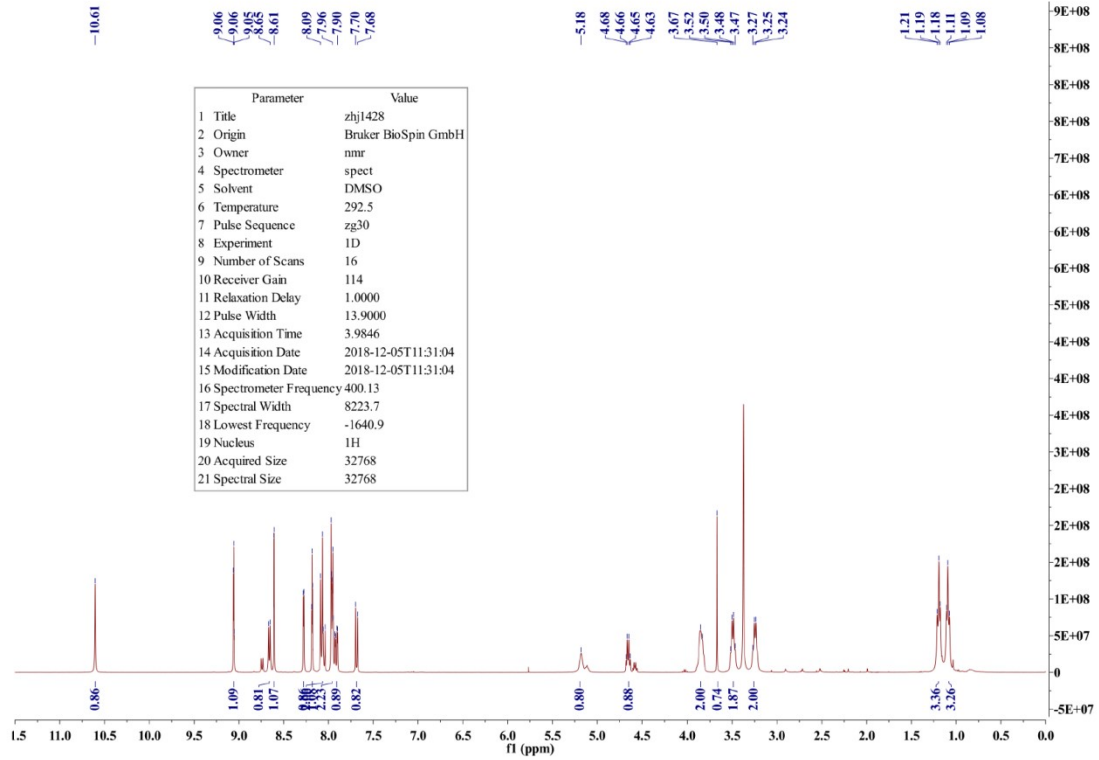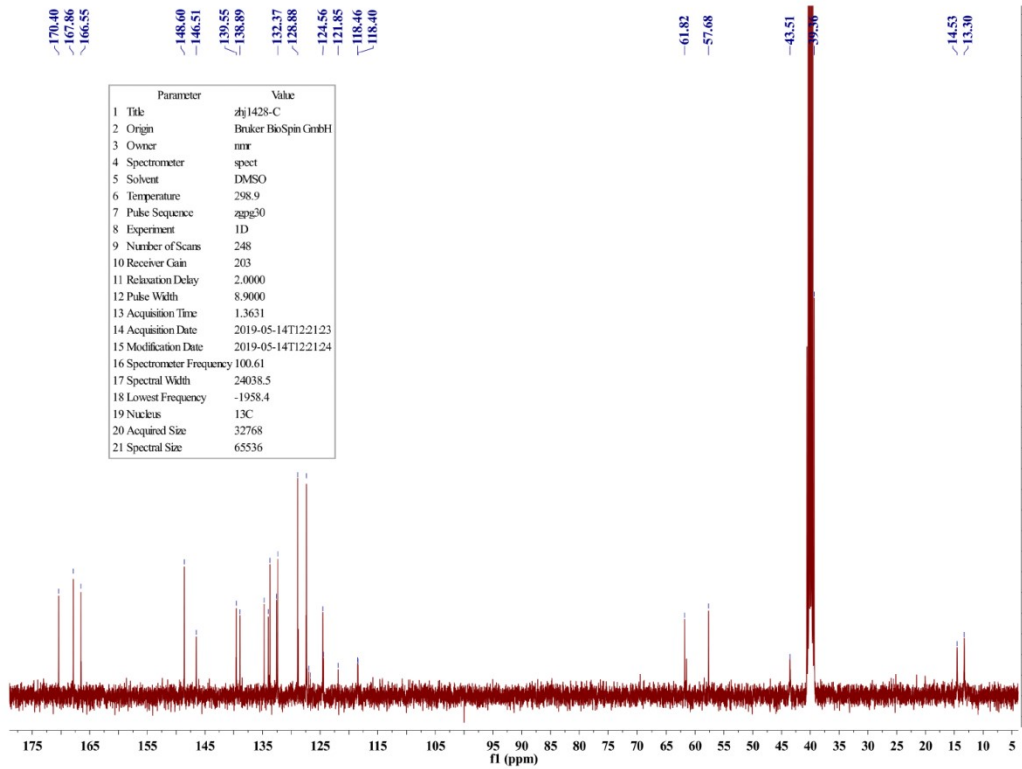

(S)-5-(4-((1-((4-chloro-3-(trifluoromethyl)phenyl)amino)-3-hydroxy-1-oxopropan-2-yl)carbamoyl)phenyl)-N-cyclopropylnicotinamide (SR2)

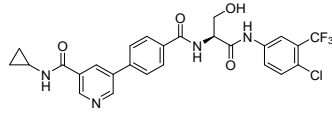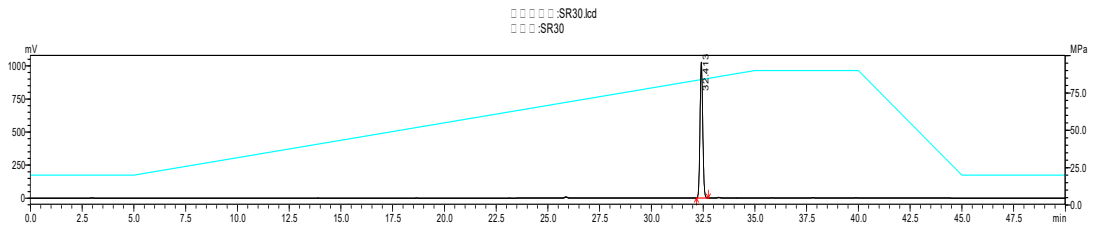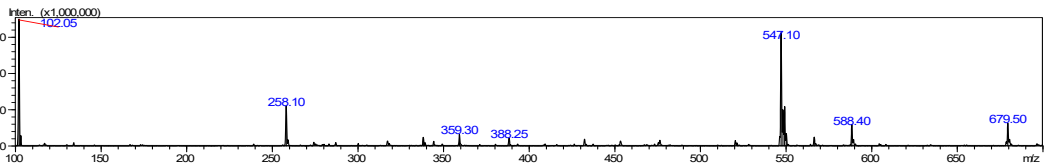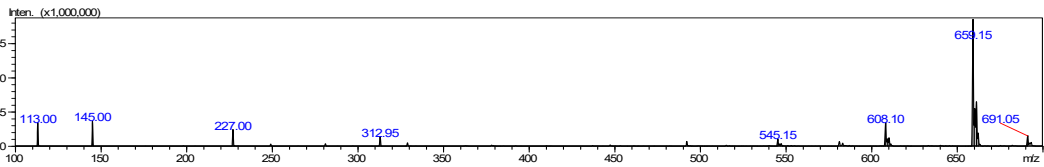

Item name: L6  
Item description:

Channel name: 2: Average Time 0.1527 min : TOF MSe (50-2000) 6eV ESI+ : Combined

1.22e7

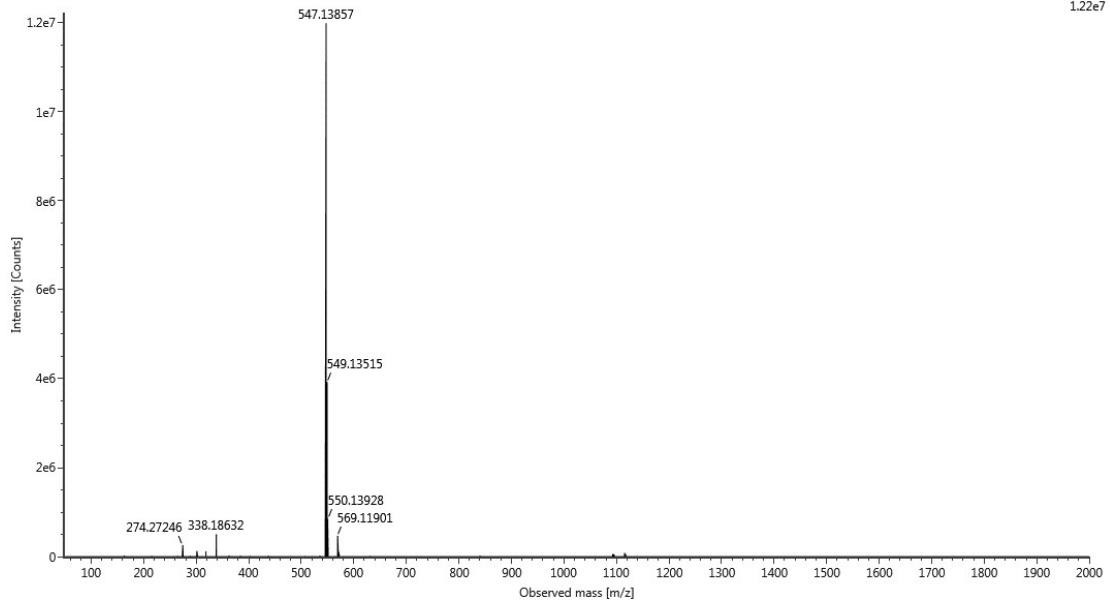

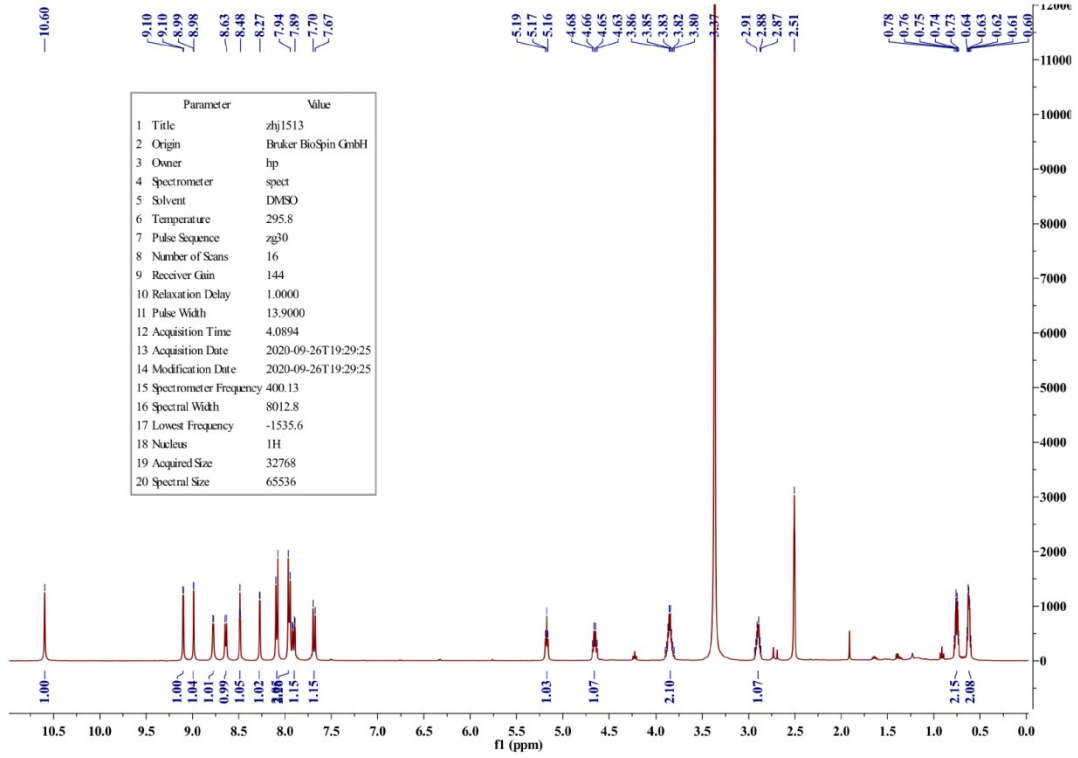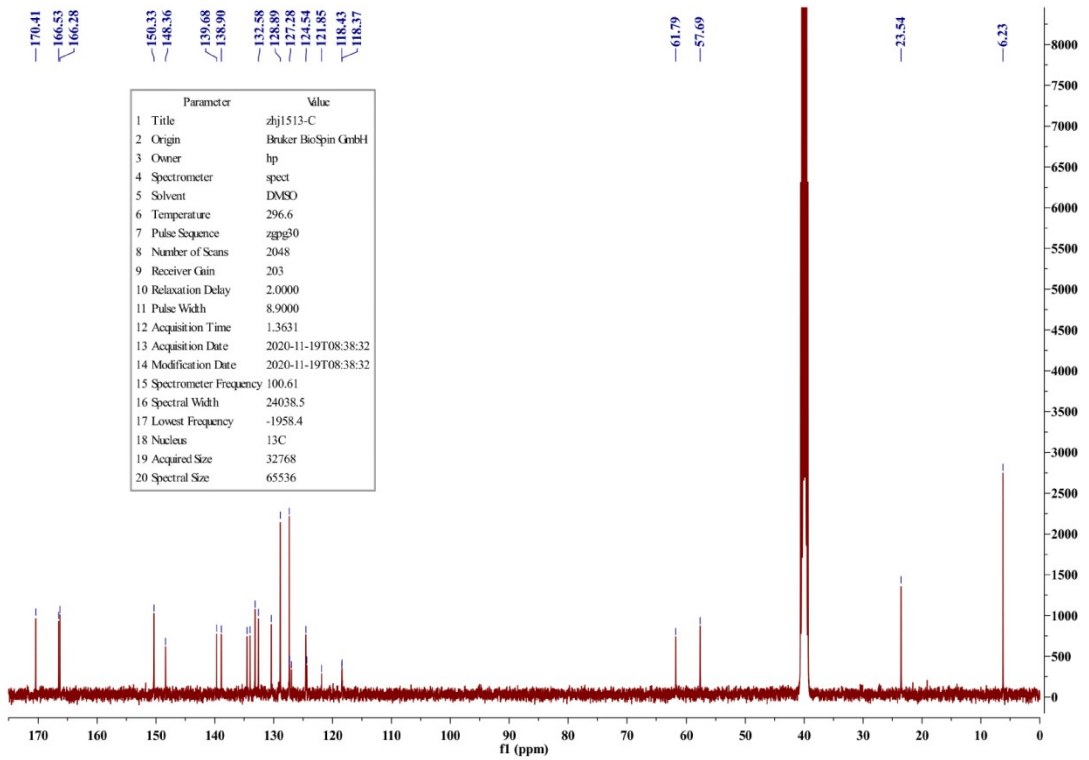

(S)-N-(1-((4-chloro-3-(trifluoromethyl)phenyl)amino)-3-hydroxy-1-oxopropan-2-yl)-4-(6-(methylsulfonamido)pyridin-3-yl)benzamide (SR3)

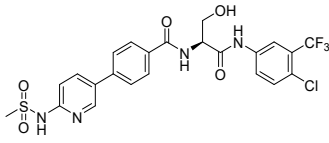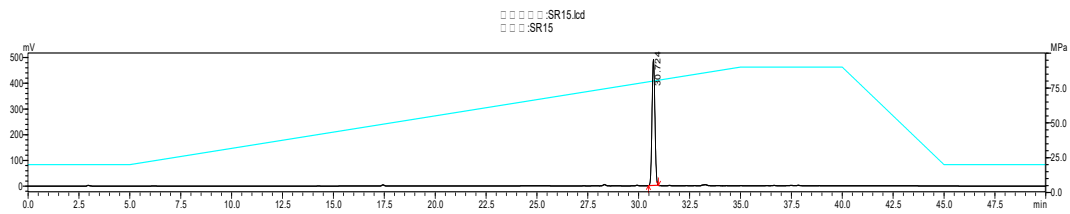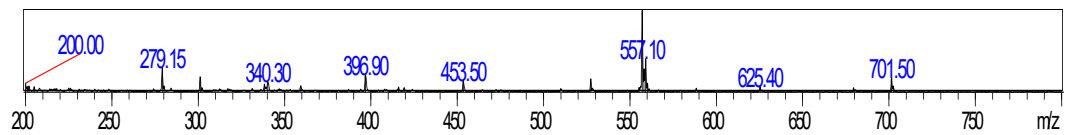

Item name: L40  
Item description:

Channel name: 2: Average Time 0.1582 min : TOF MS (50-3000) 6eV ESI+ : Combined

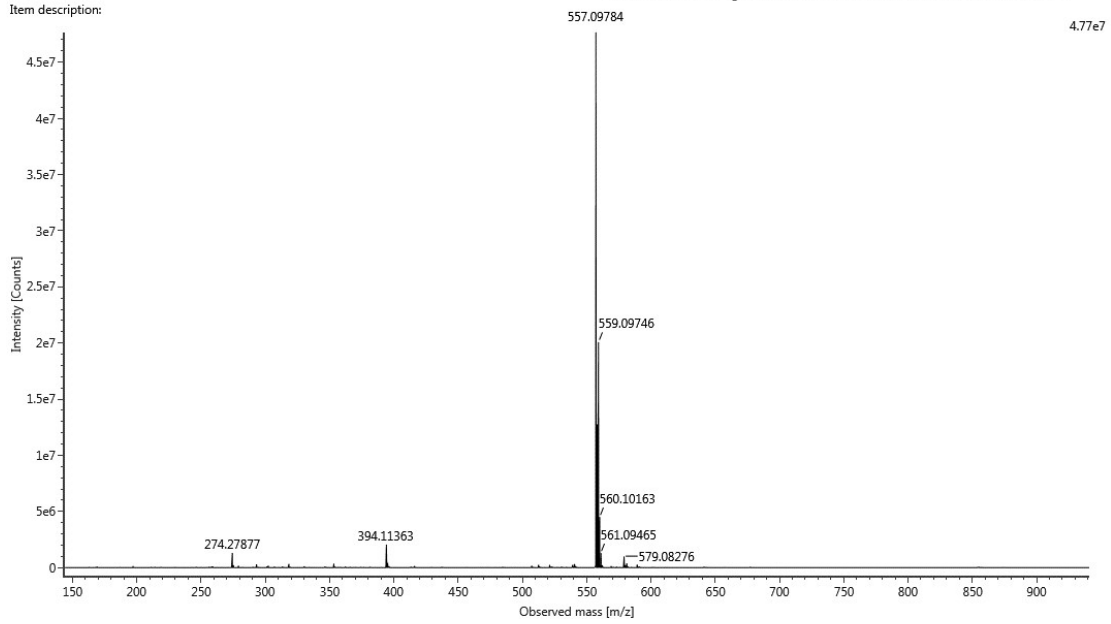

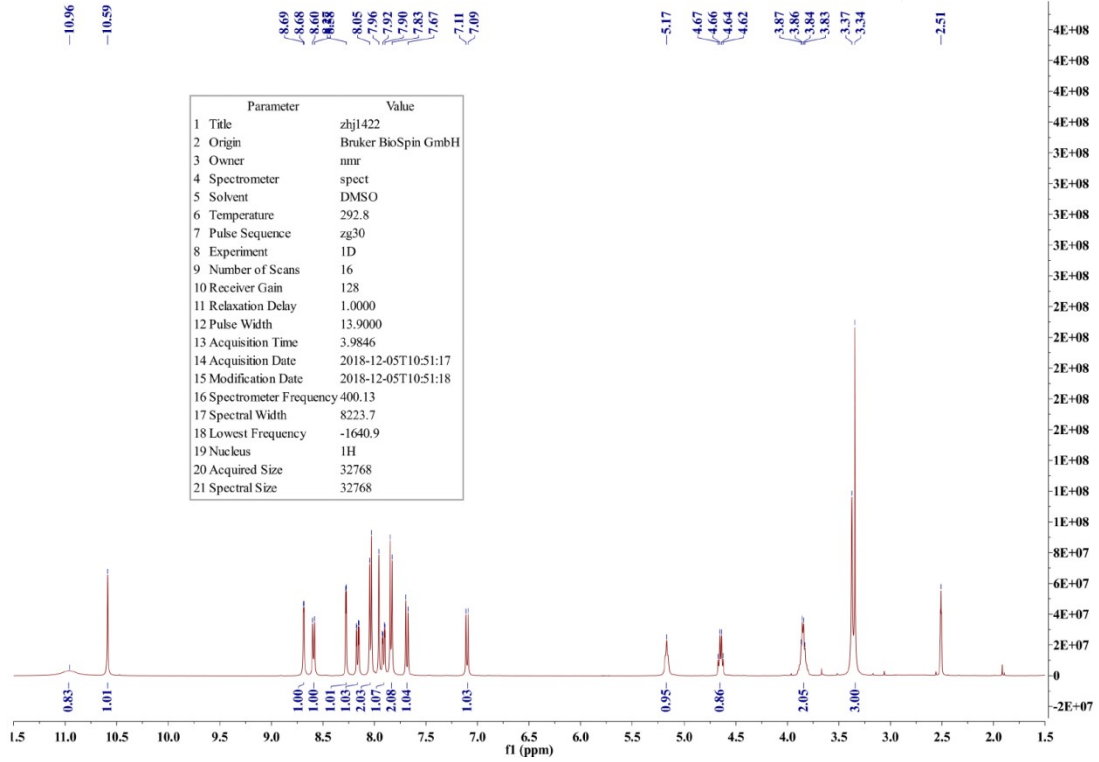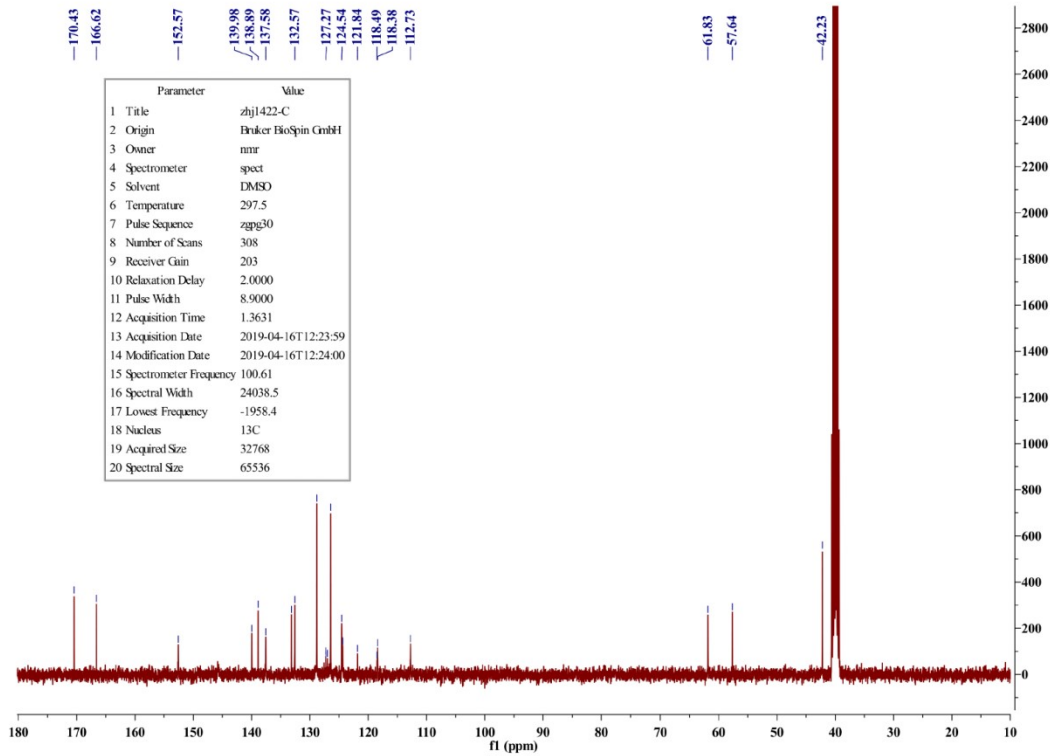



(S)-4-(6-acetamidopyridin-3-yl)-N-(1-((4-chloro-3-(trifluoromethyl)phenyl)amino)-3-hydroxy-1-oxopropan-2-yl)benzamide (SR4)

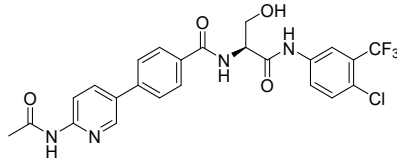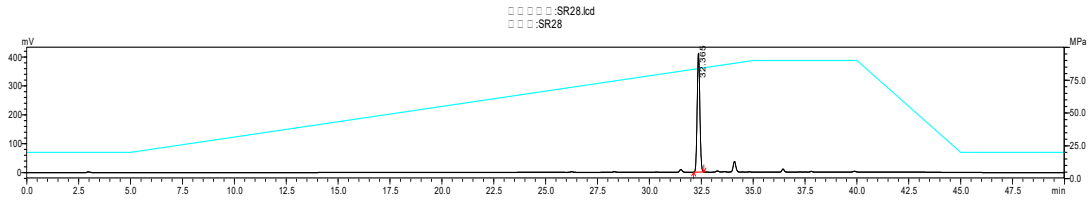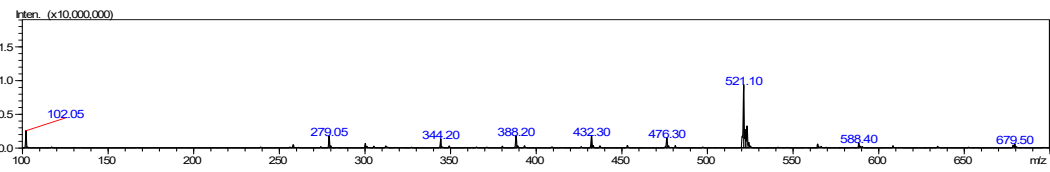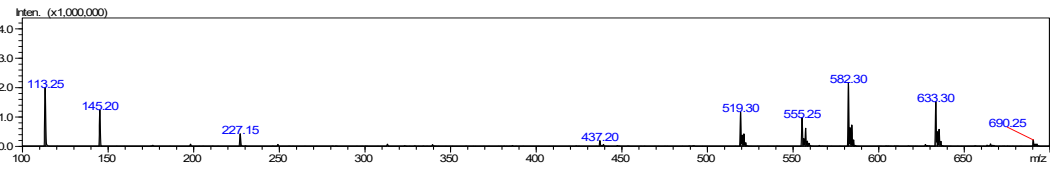

Item name: L4  
Item description:

Channel name: 2: Average Time 0.1497 min : TOF MSe (50-2000) 6eV ESI+ : Centroided : Combined

4.46e7

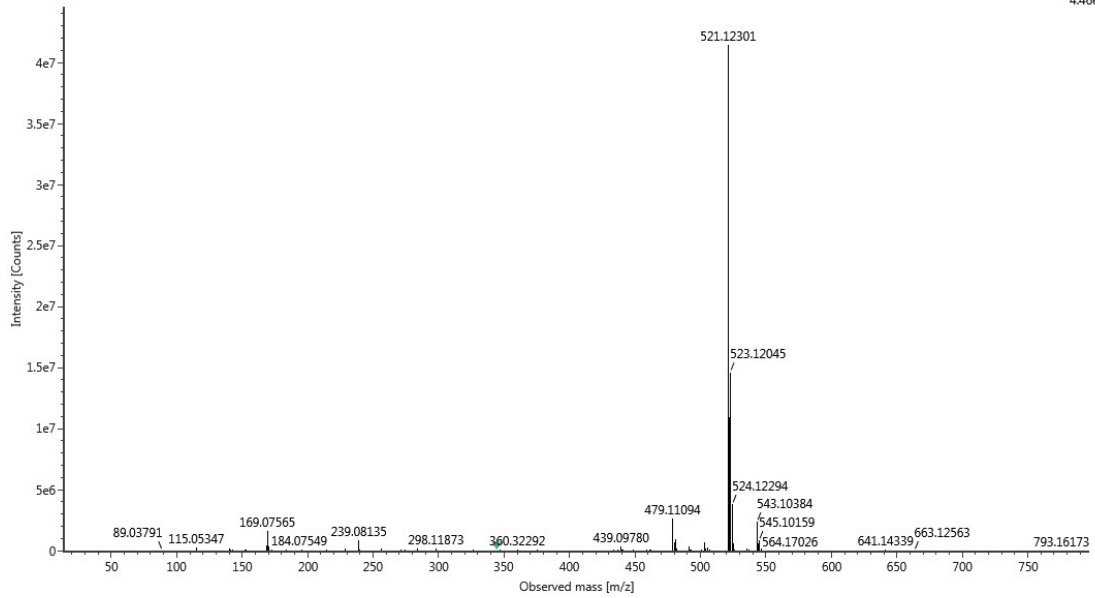

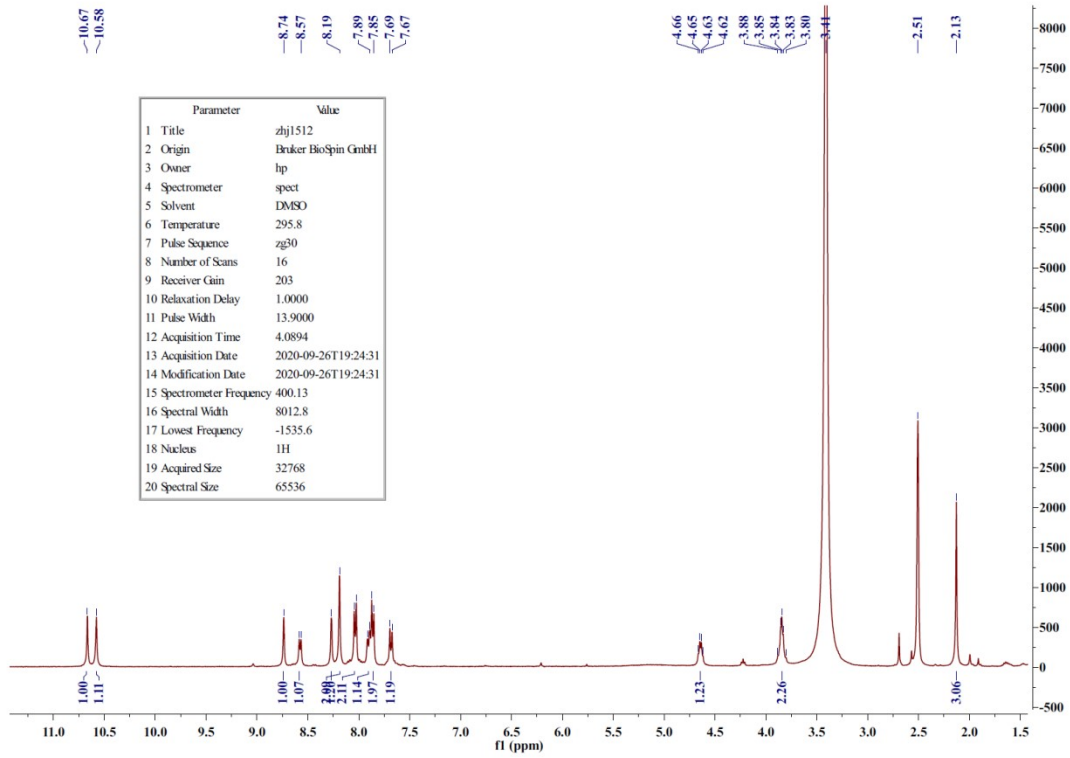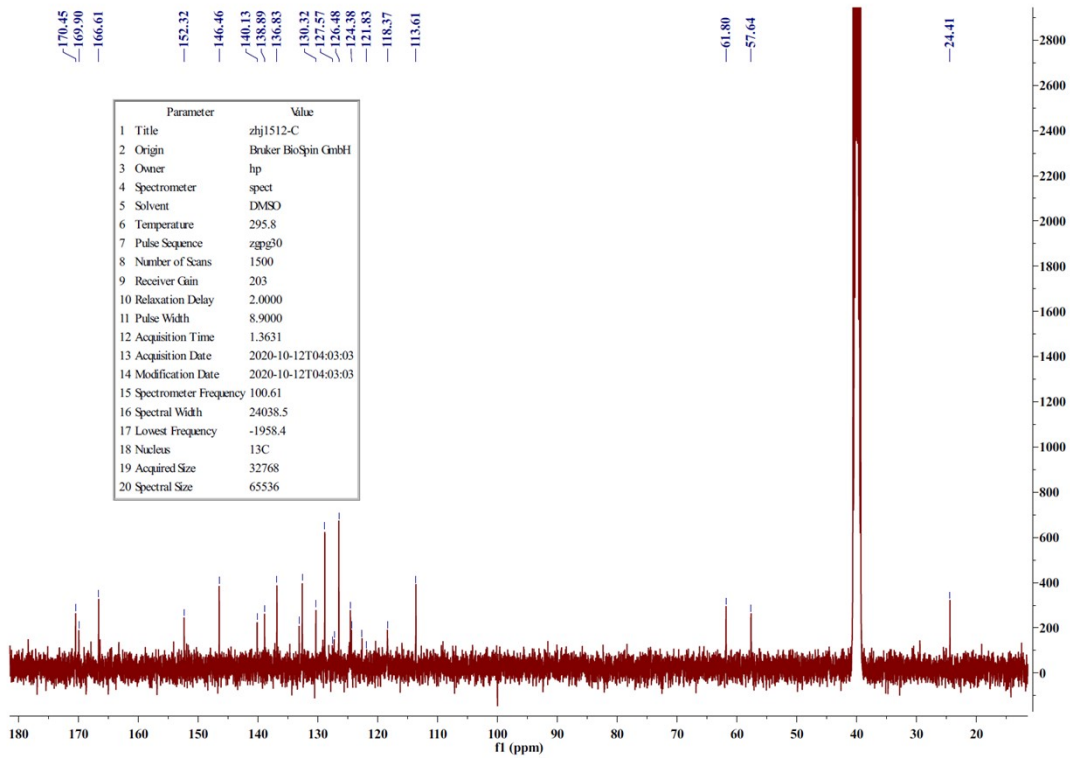

(S)-N-(1-((4-chloro-3-(trifluoromethyl)phenyl)amino)-3-hydroxy-1-oxopropan-2-yl)-4-(6-pivalamidopyridin-3-yl)benzamide (SR5)

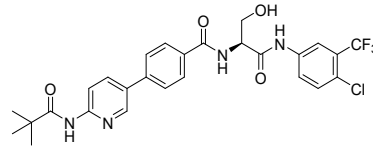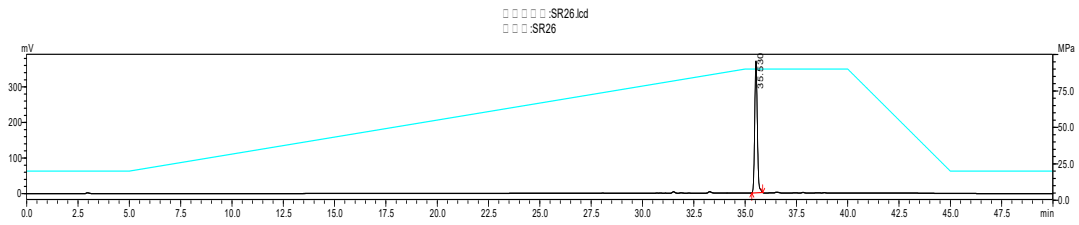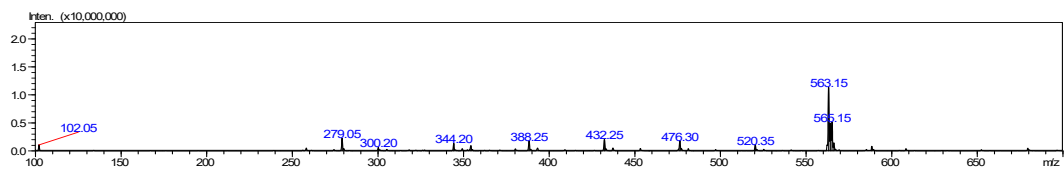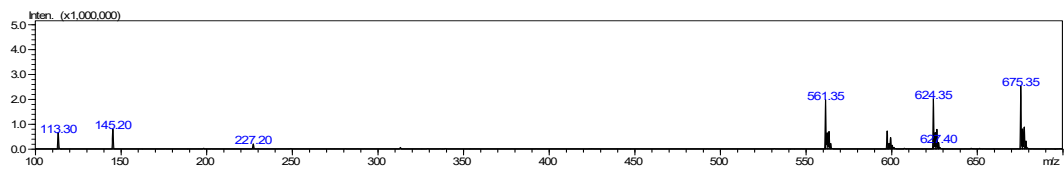

Item name: L9  
Item description:

Channel name: 2: Average Time 0.1774 min : TOF MSe (50-2000) 6eV ESI+ : Combined

2.18e7

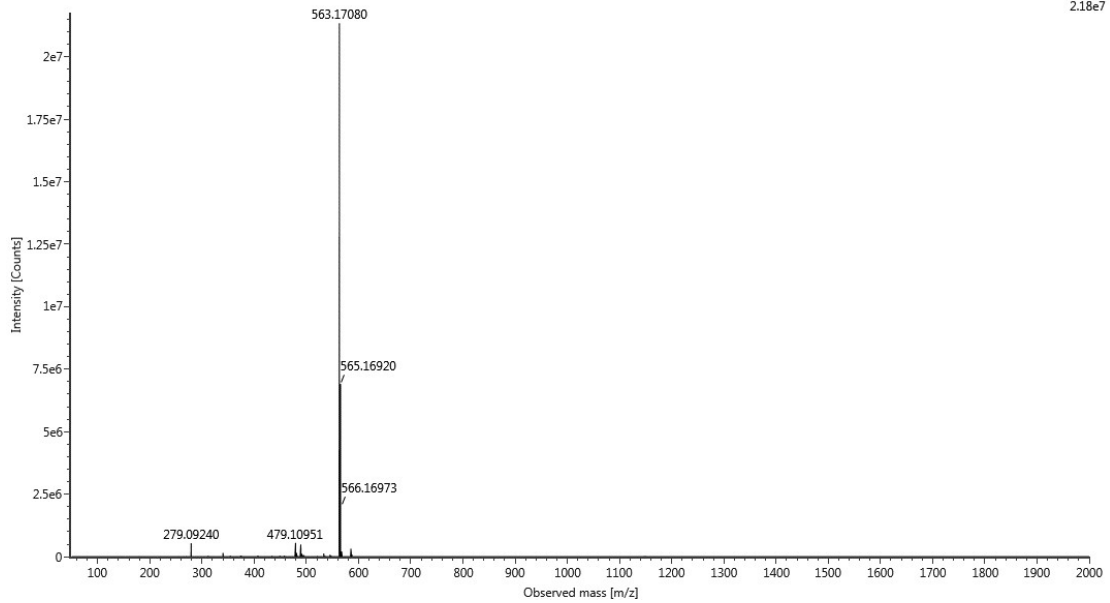

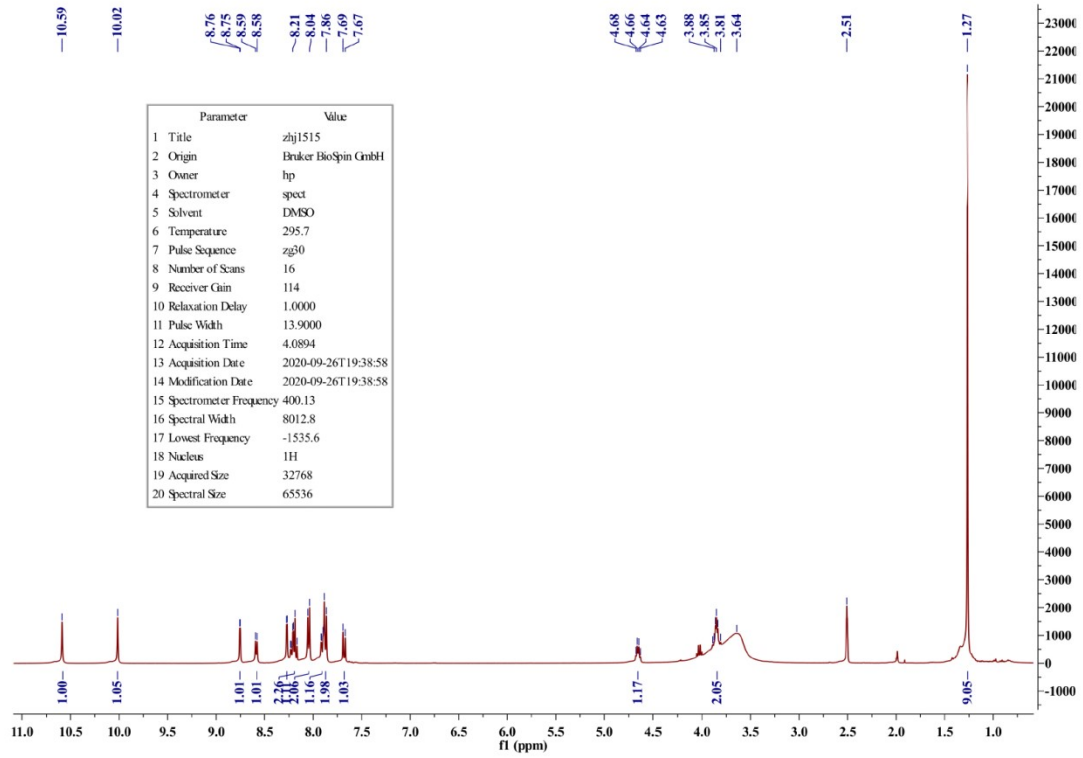

| Parameter                 | Value               |
|---------------------------|---------------------|
| 1 Title                   | zhj1515             |
| 2 Origin                  | Bruker BioSpin GmbH |
| 3 Owner                   | hp                  |
| 4 Spectrometer            | spect               |
| 5 Solvent                 | DMSO                |
| 6 Temperature             | 295.7               |
| 7 Pulse Sequence          | zg30                |
| 8 Number of Scans         | 16                  |
| 9 Receiver Gain           | 114                 |
| 10 Relaxation Delay       | 1.0000              |
| 11 Pulse Width            | 13.9000             |
| 12 Acquisition Time       | 4.0894              |
| 13 Acquisition Date       | 2020-09-26T19:38:58 |
| 14 Modification Date      | 2020-09-26T19:38:58 |
| 15 Spectrometer Frequency | 400.13              |
| 16 Spectral Width         | 8012.8              |
| 17 Lowest Frequency       | -1535.6             |
| 18 Nucleus                | 1H                  |
| 19 Acquired Size          | 32768               |
| 20 Spectral Size          | 65536               |

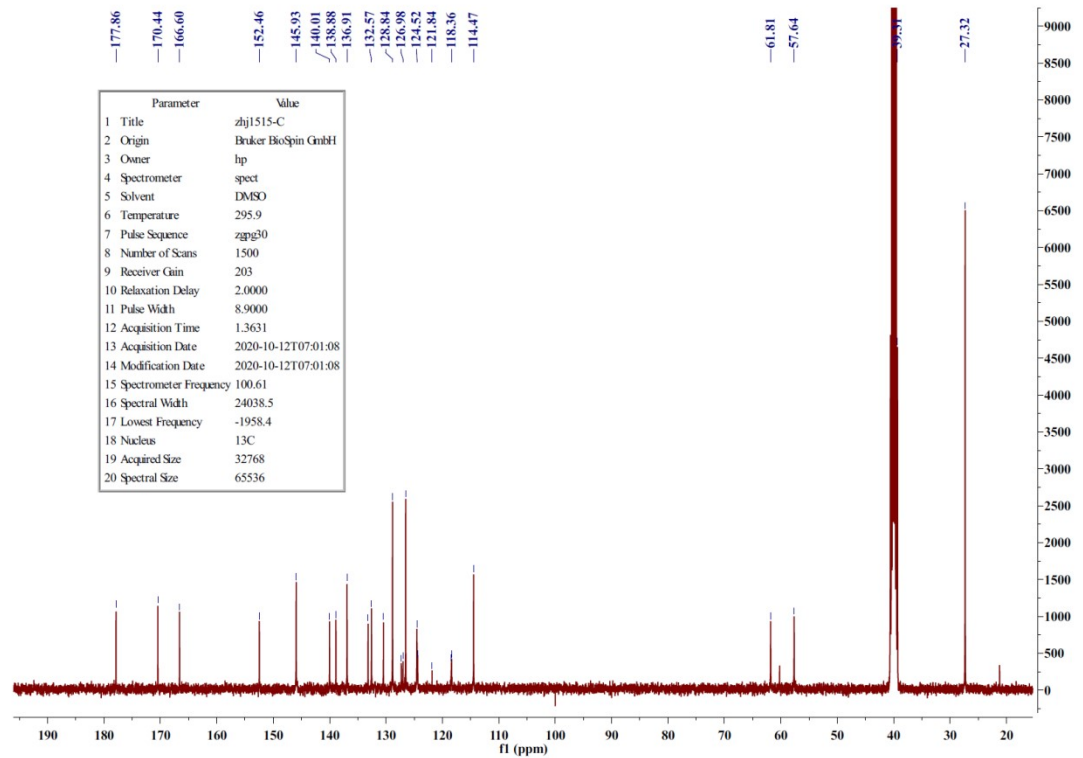

| Parameter                 | Value               |
|---------------------------|---------------------|
| 1 Title                   | zhj1515-C           |
| 2 Origin                  | Bruker BioSpin GmbH |
| 3 Owner                   | hp                  |
| 4 Spectrometer            | spect               |
| 5 Solvent                 | DMSO                |
| 6 Temperature             | 295.9               |
| 7 Pulse Sequence          | zgpg30              |
| 8 Number of Scans         | 1500                |
| 9 Receiver Gain           | 203                 |
| 10 Relaxation Delay       | 2.0000              |
| 11 Pulse Width            | 8.9000              |
| 12 Acquisition Time       | 1.3631              |
| 13 Acquisition Date       | 2020-10-12T07:01:08 |
| 14 Modification Date      | 2020-10-12T07:01:08 |
| 15 Spectrometer Frequency | 100.61              |
| 16 Spectral Width         | 24038.5             |
| 17 Lowest Frequency       | -1958.4             |
| 18 Nucleus                | 13C                 |
| 19 Acquired Size          | 32768               |
| 20 Spectral Size          | 65536               |

(S)-4-(6-aminopyridin-3-yl)-N-(1-((4-chloro-3-(trifluoromethyl)phenyl)amino)-3-hydroxy-1-oxopropan-2-yl)benzamide (SR6)

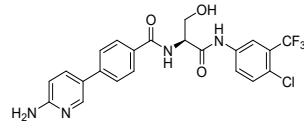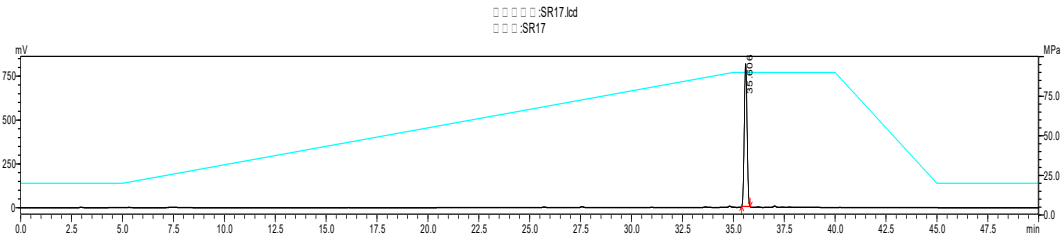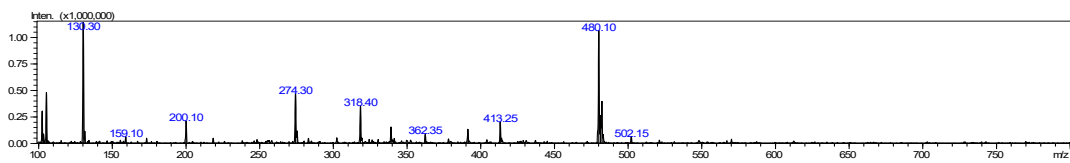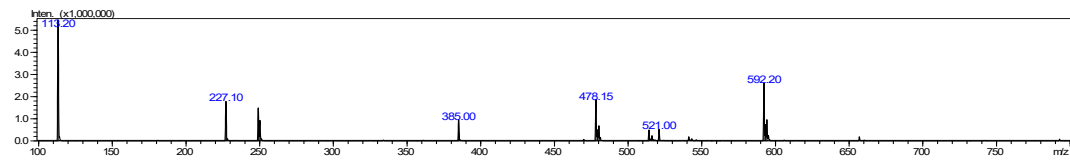

Item name: L22  
Item description:

Channel name: 2: Average Time 0.1462 min : TOF MSe (50-2000) 6eV ESI+ : Centroided : Combined

9.25e6

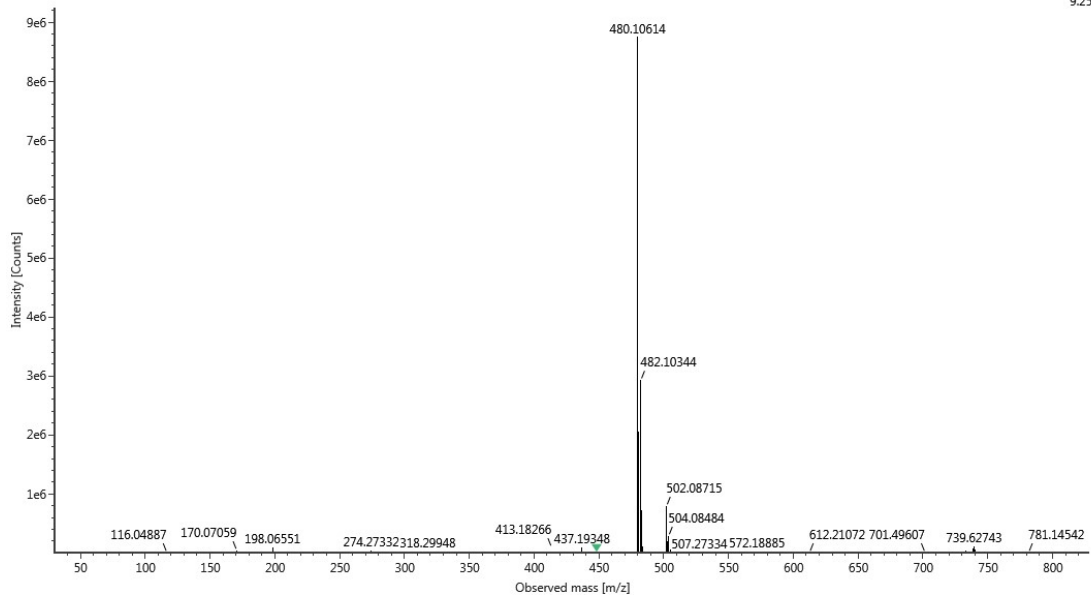

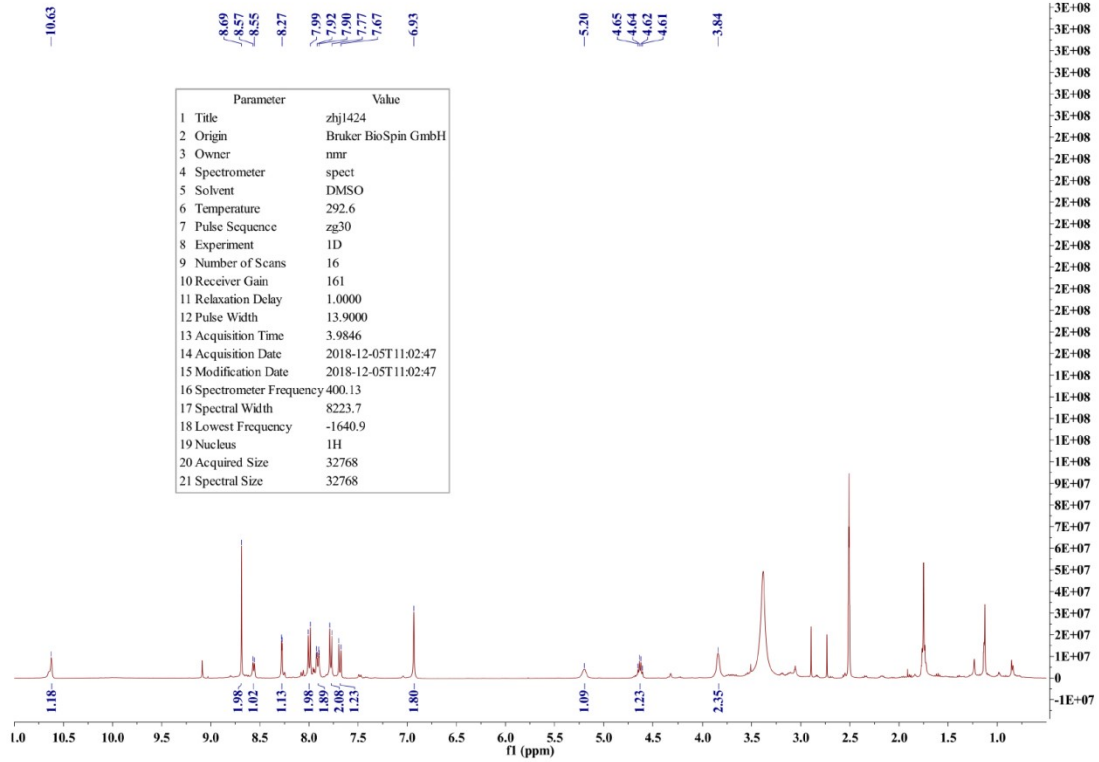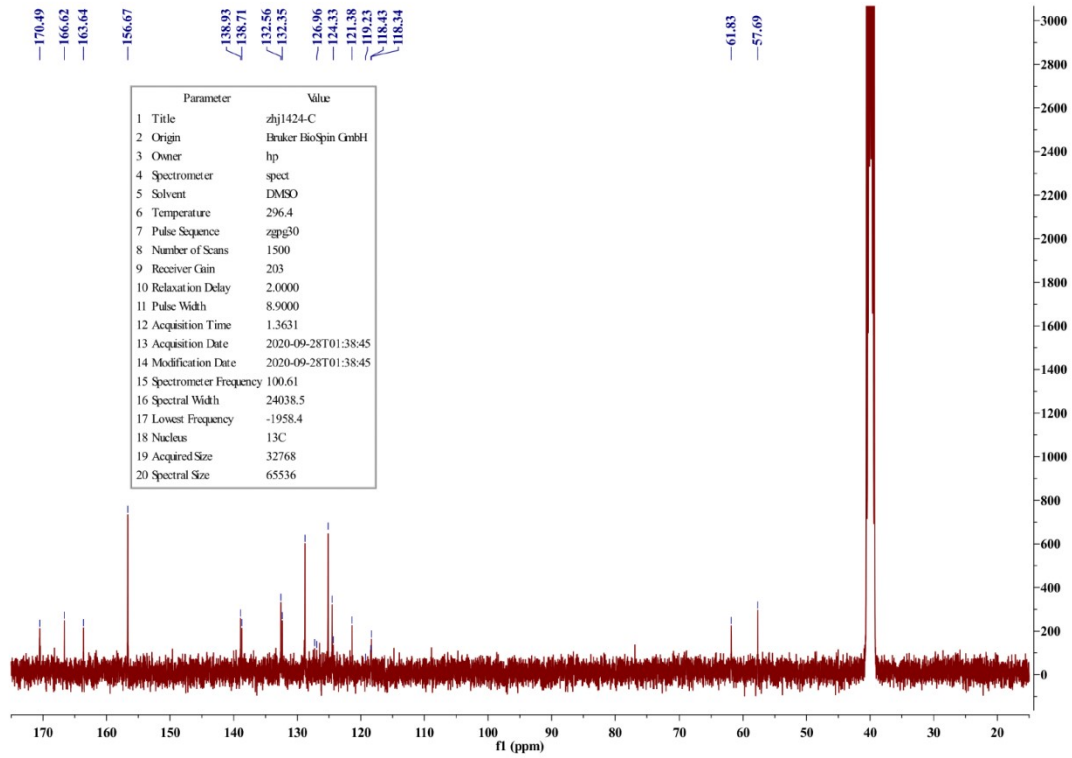

(S)-5-(3-((1-((4-chloro-3-(trifluoromethyl)phenyl)amino)-3-hydroxy-1-oxopropan-2-yl)carbamoyl)phenyl)-N,N-diethylnicotinamide (SR7)

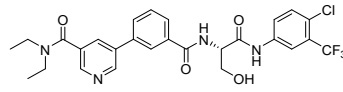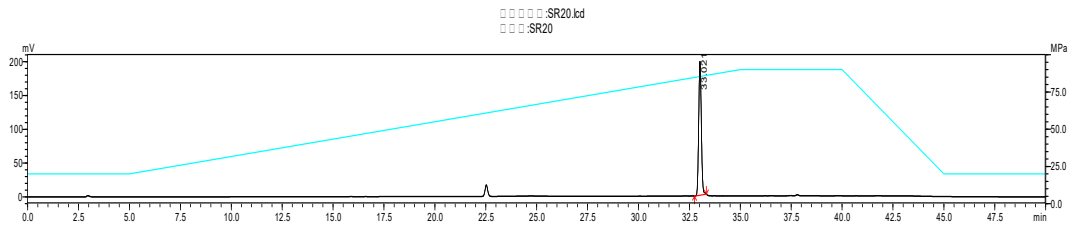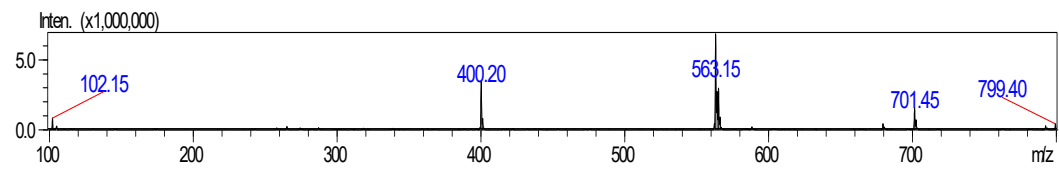

Item name: L35  
Item description:

Channel name: 2: Average Time 0.1581 min : TOF MS (50-3000) 6eV ESI+ : Combined

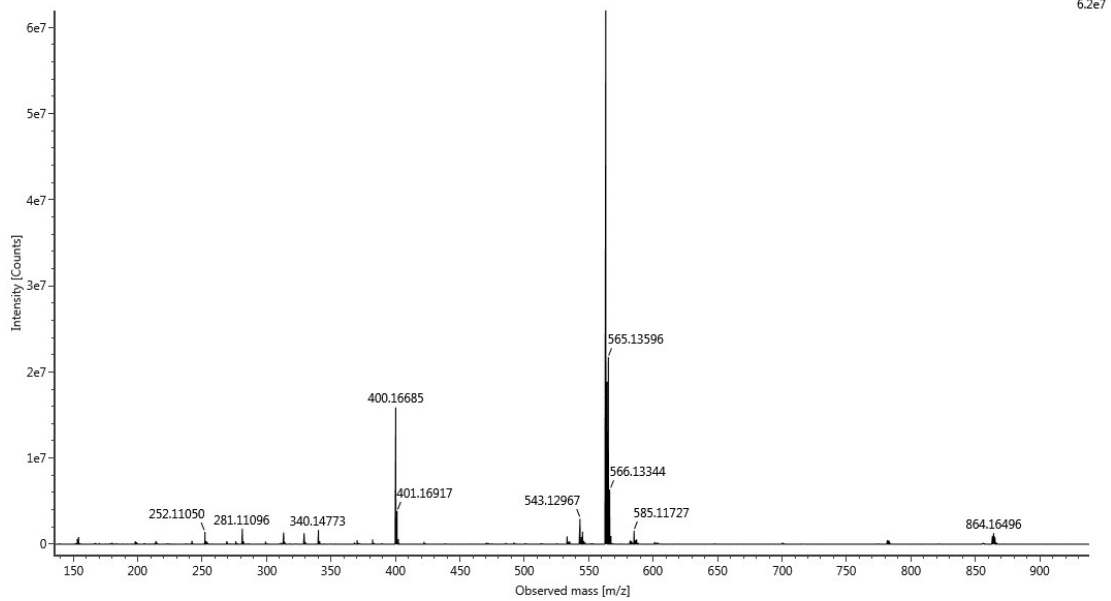

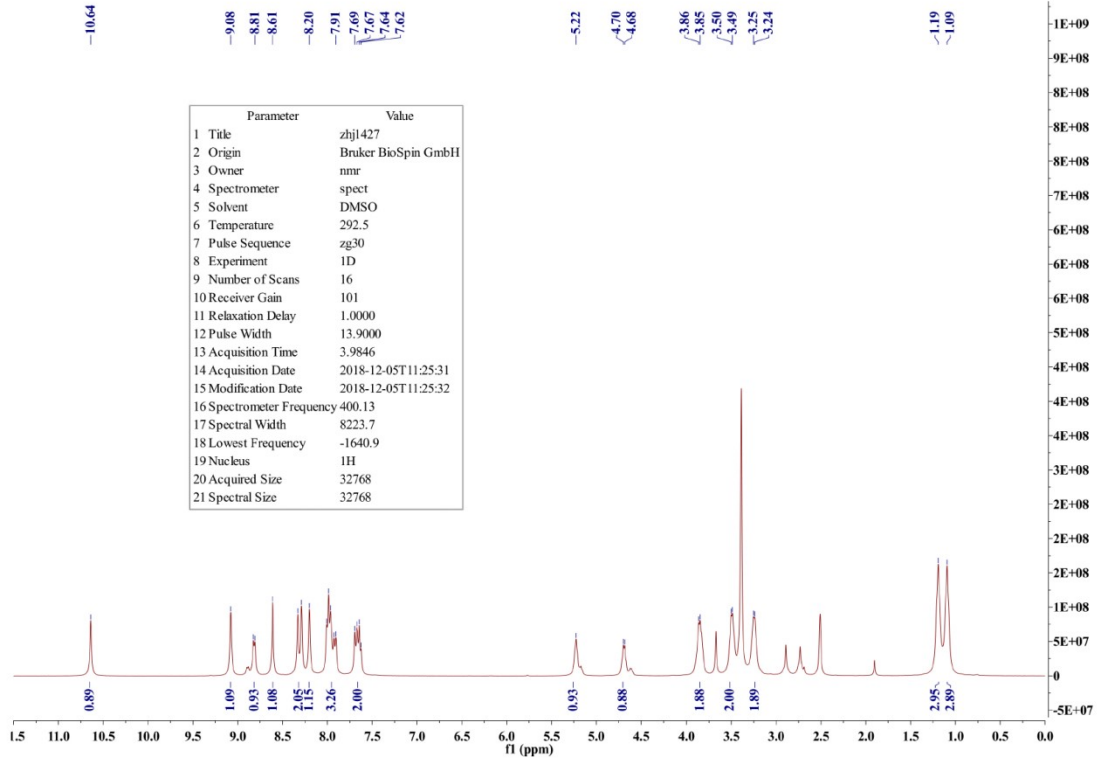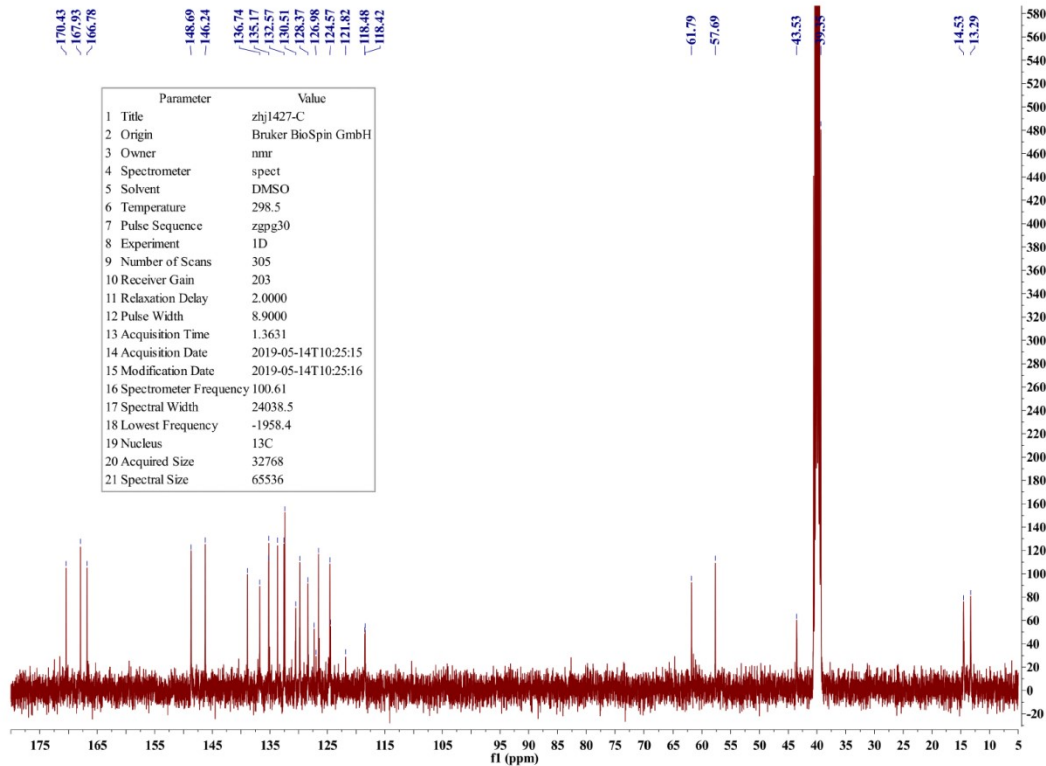



(S)-5-(3-((1-((4-chloro-3-(trifluoromethyl)phenyl)amino)-3-hydroxy-1-oxopropan-2-yl)carbamoyl)phenyl)-N-cyclopropylnicotinamide (SR8)

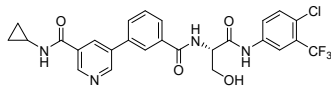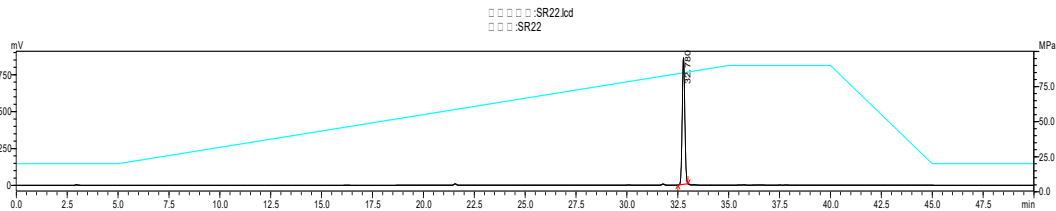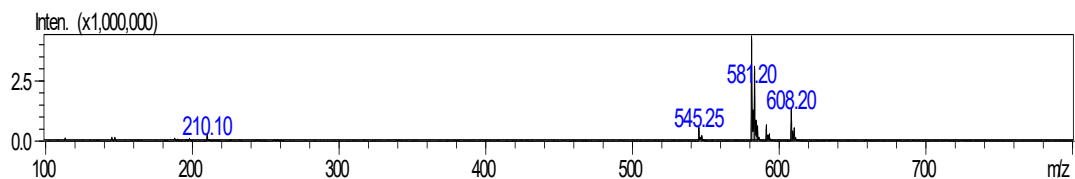

Item name: L38  
Item description:

Channel name: 2: Average Time 0.1460 min : TOF MS (50-3000) 6eV ESI+ : Combined

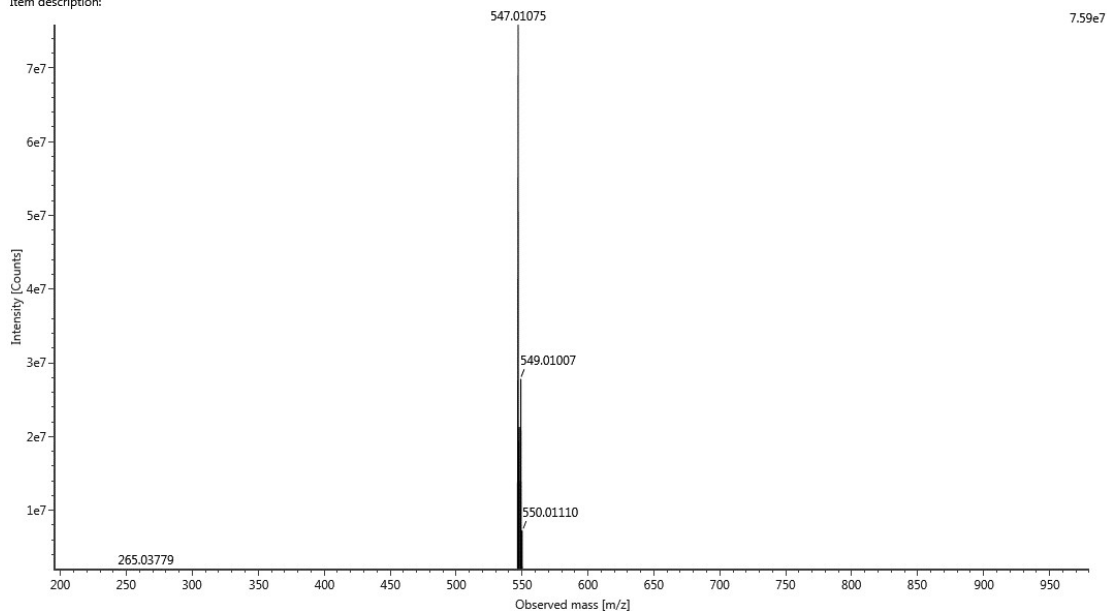

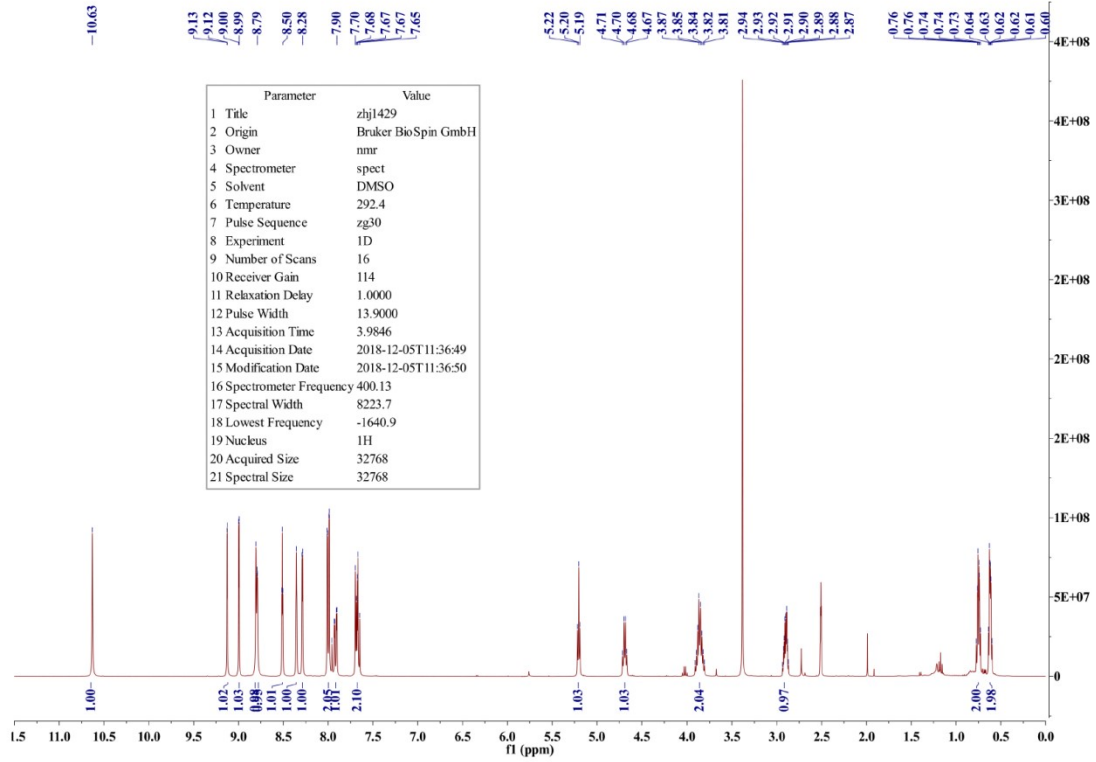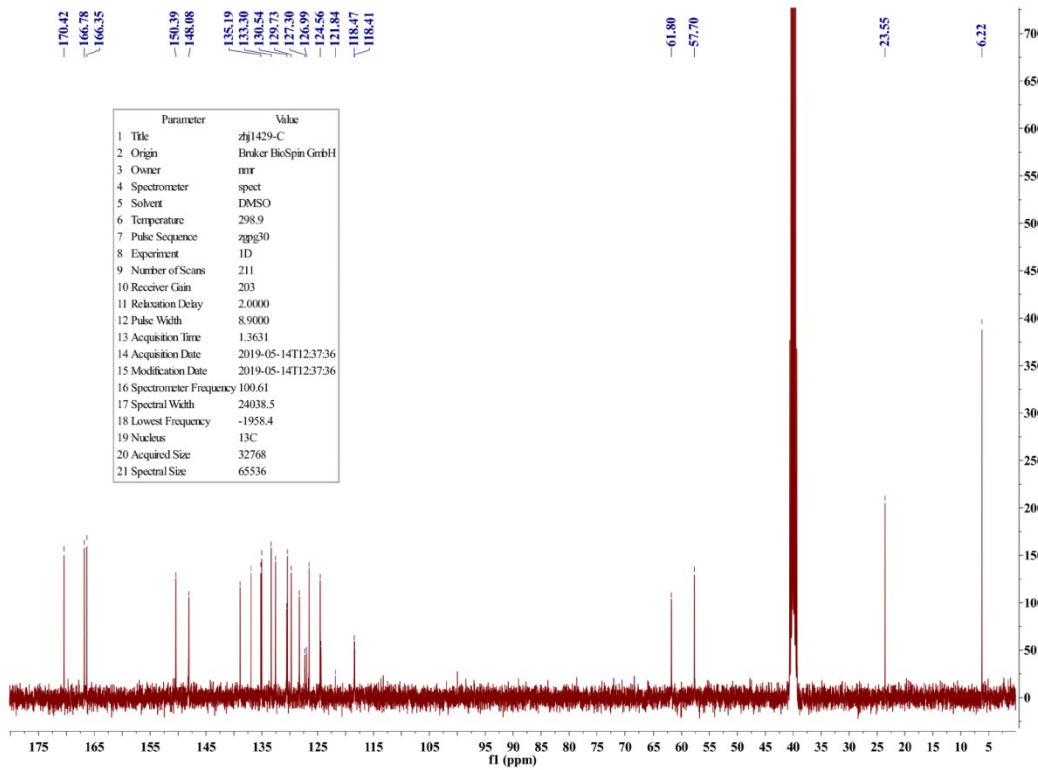

(S)-N-(1-((4-chloro-3-(trifluoromethyl)phenyl)amino)-3-hydroxy-1-oxopropan-2-yl)-3-(6-(methylsulfonamido)pyridin-3-yl)benzamide (SR9)

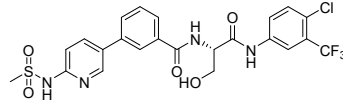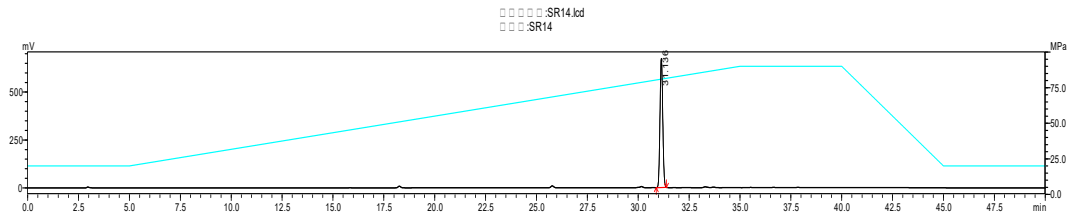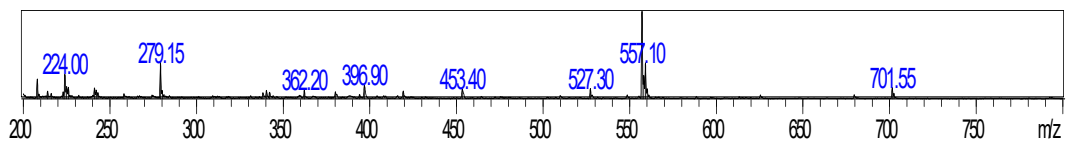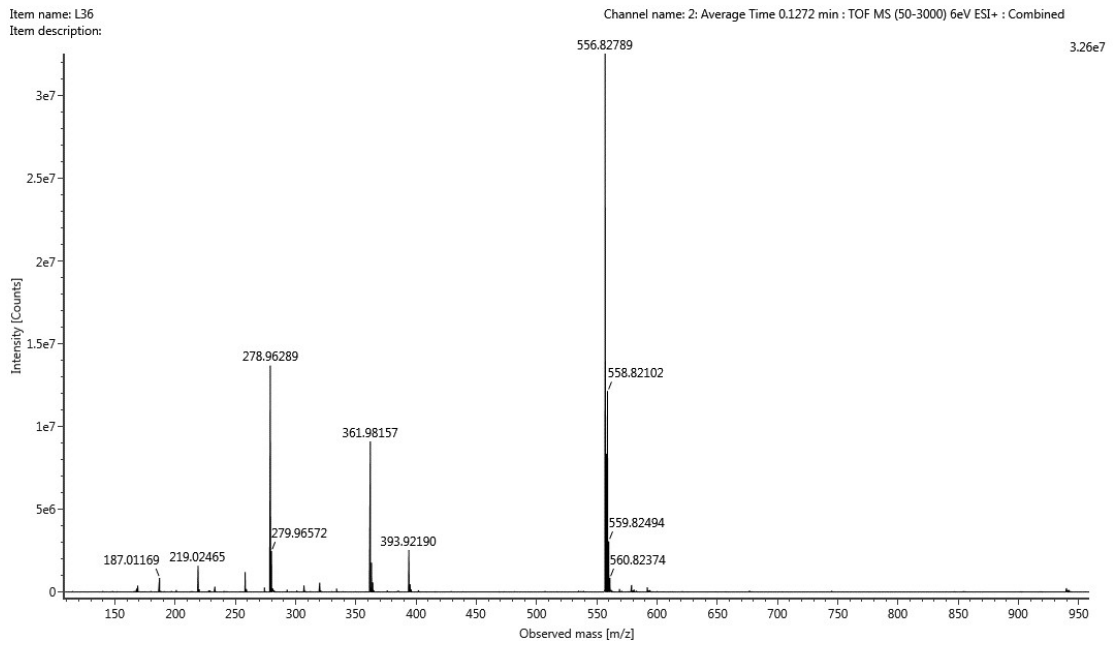

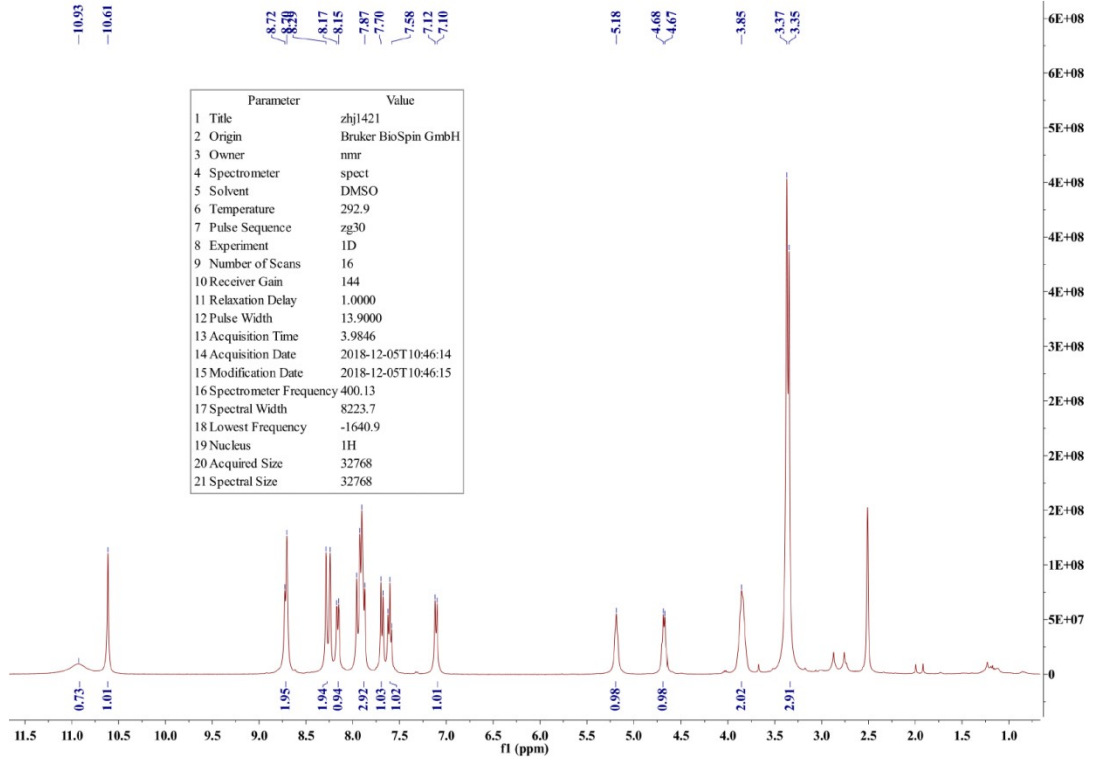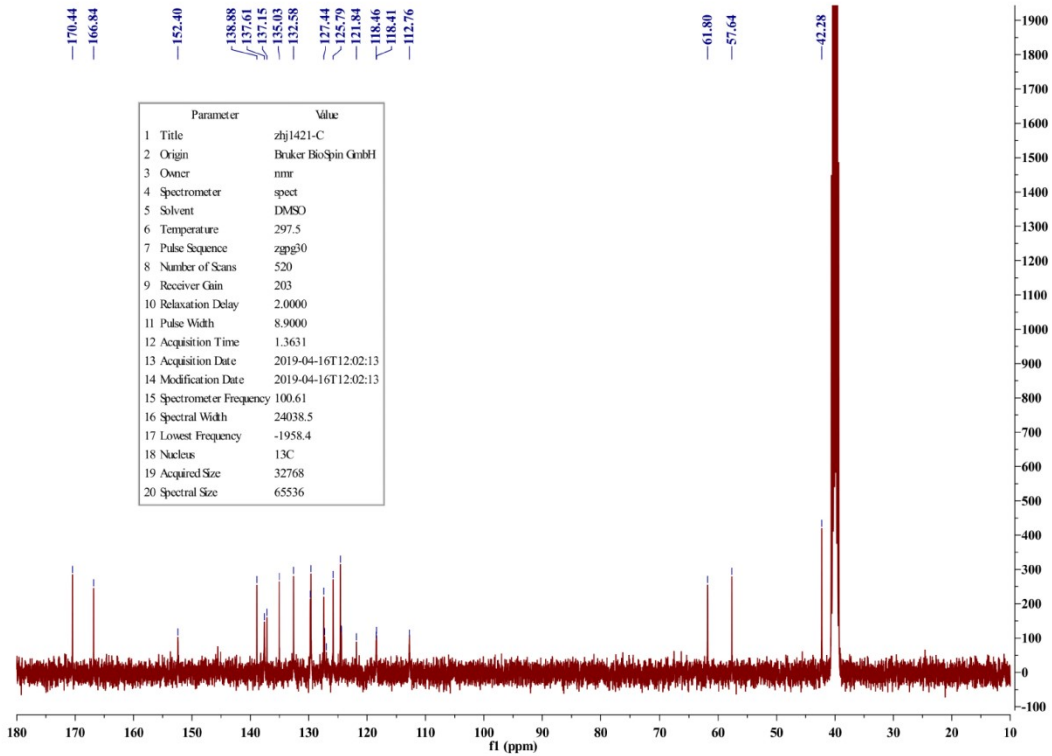

(S)-3-(6-acetamidopyridin-3-yl)-N-(1-((4-chloro-3-(trifluoromethyl)phenyl)amino)-3-hydroxy-1-oxopropan-2-yl)benzamide (SR10)

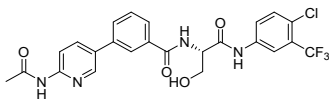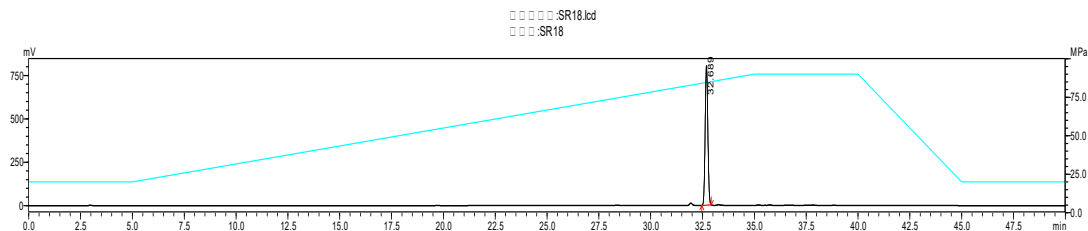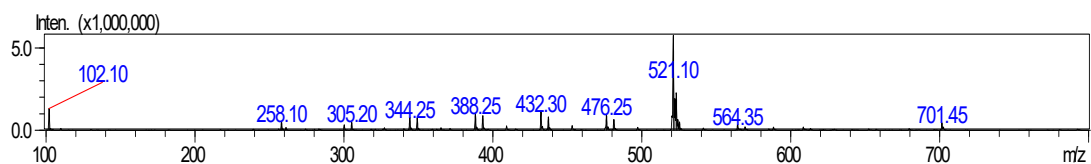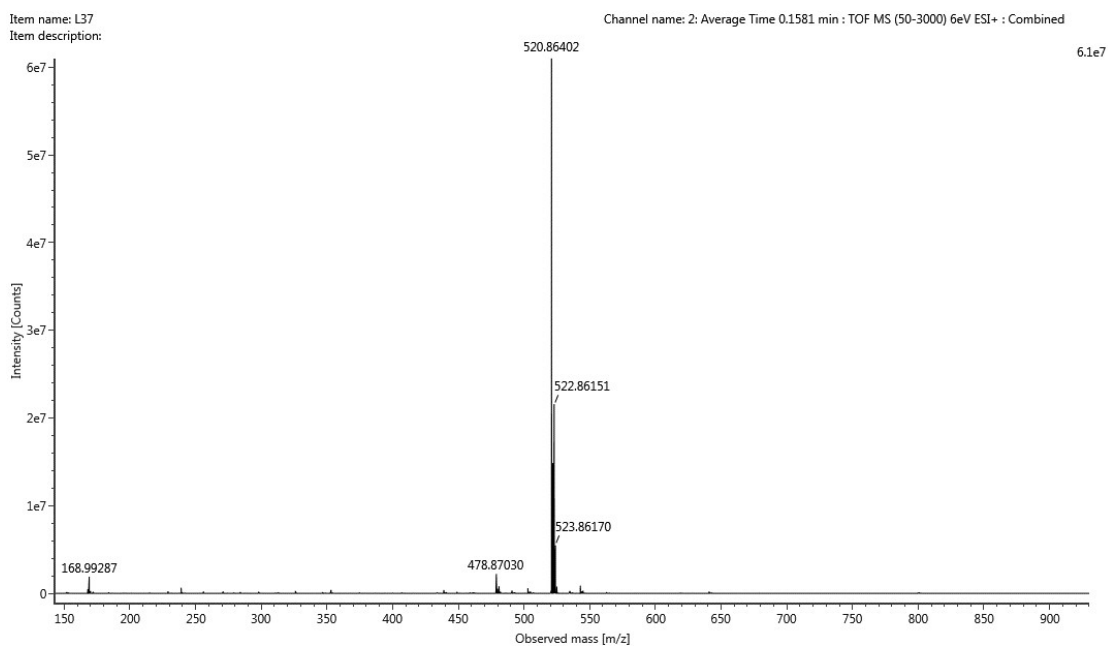

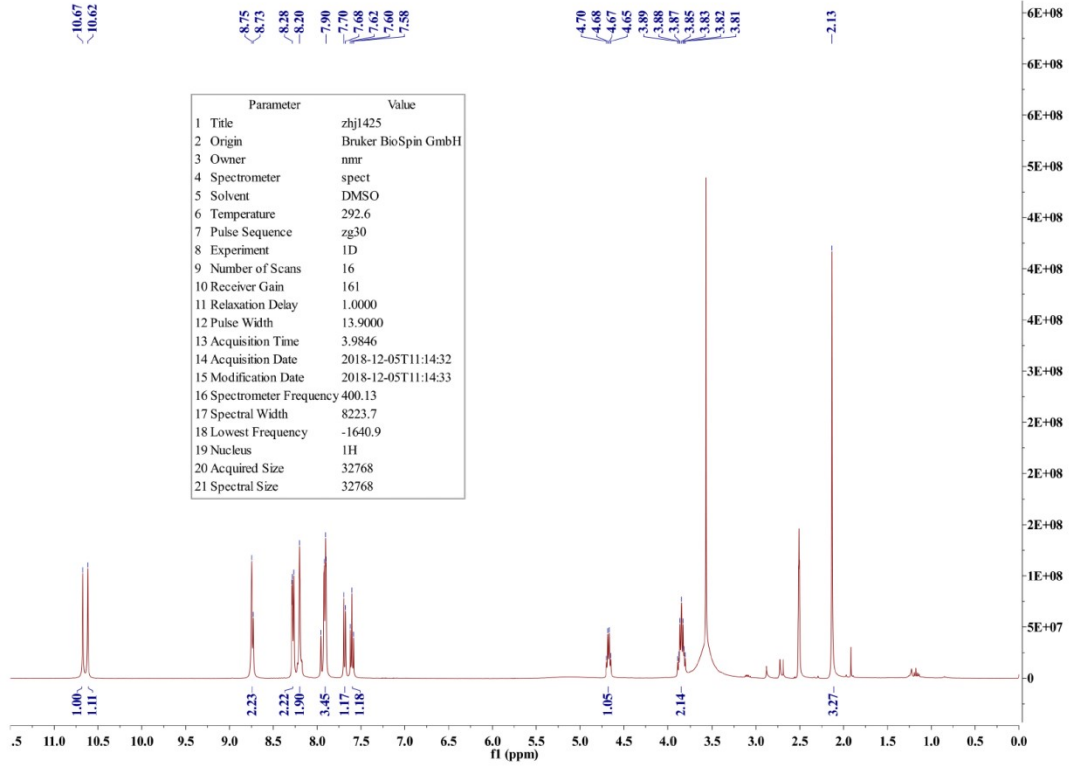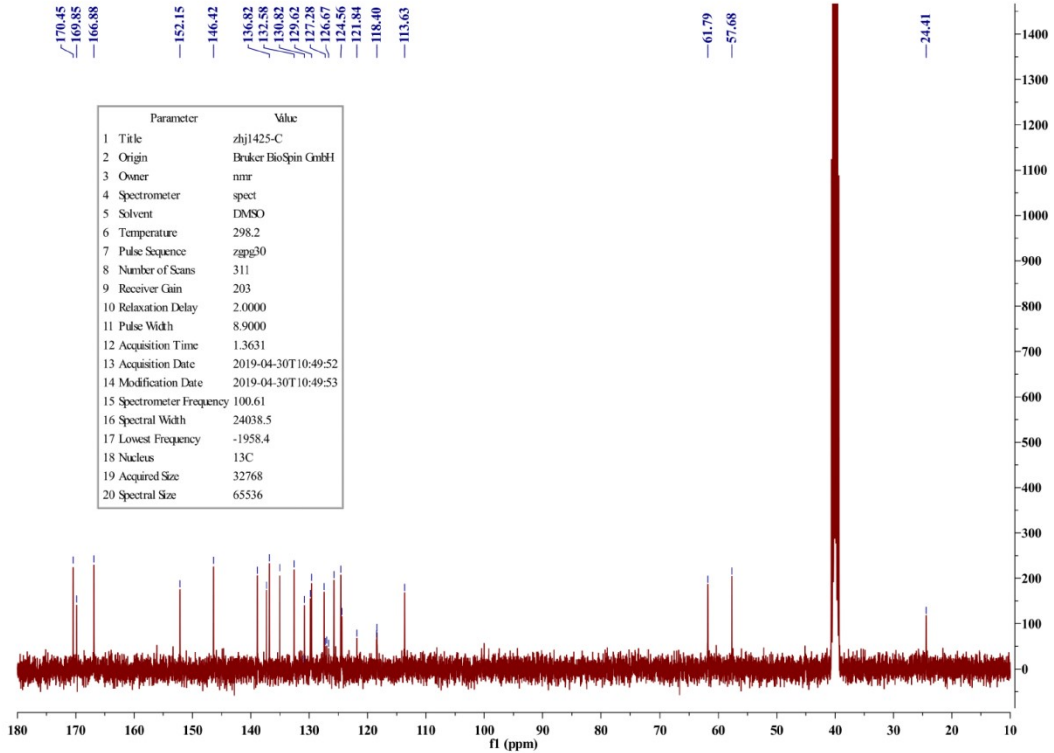

(S)-N-(1-((4-chloro-3-(trifluoromethyl)phenyl)amino)-3-hydroxy-1-oxopropan-2-yl)-3-(6-pivalamidopyridin-3-yl)benzamide (SR11)

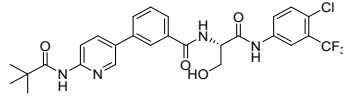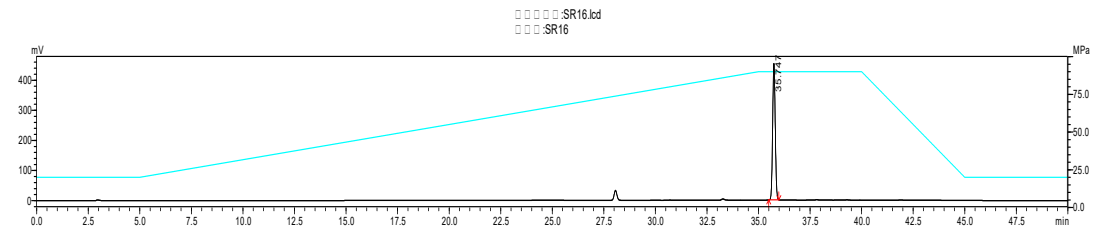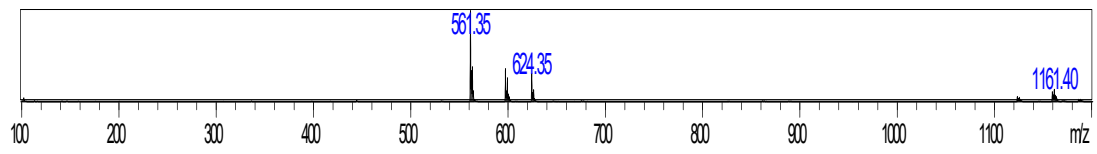

Item name: L-30  
Item description:

Channel name: 2: Average Time 0.2845 min : TOF MS (50-1500) 6eV ESI+ : Combined

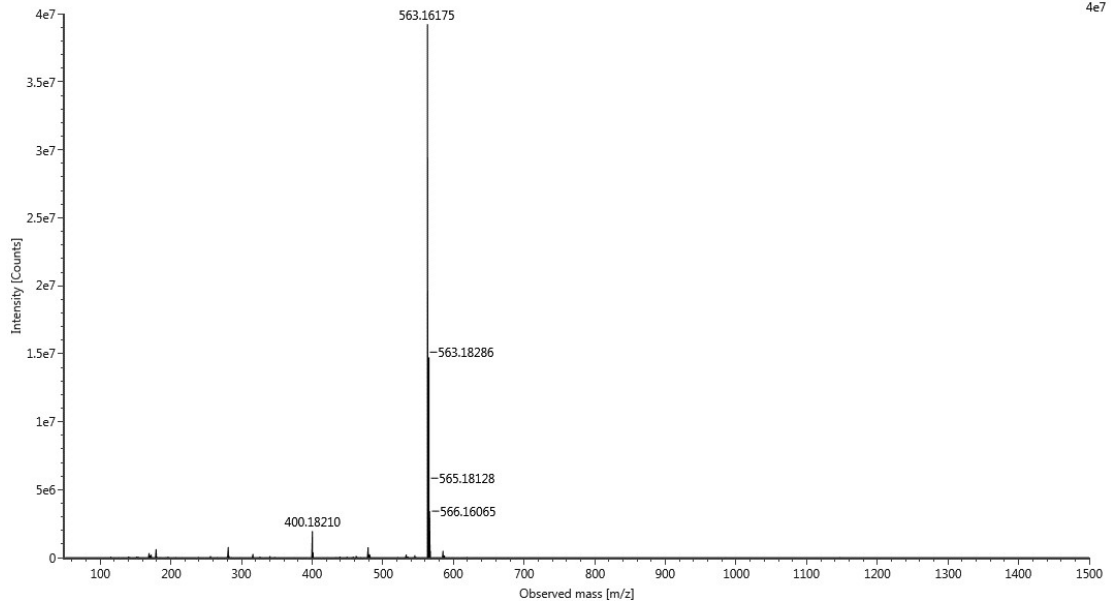

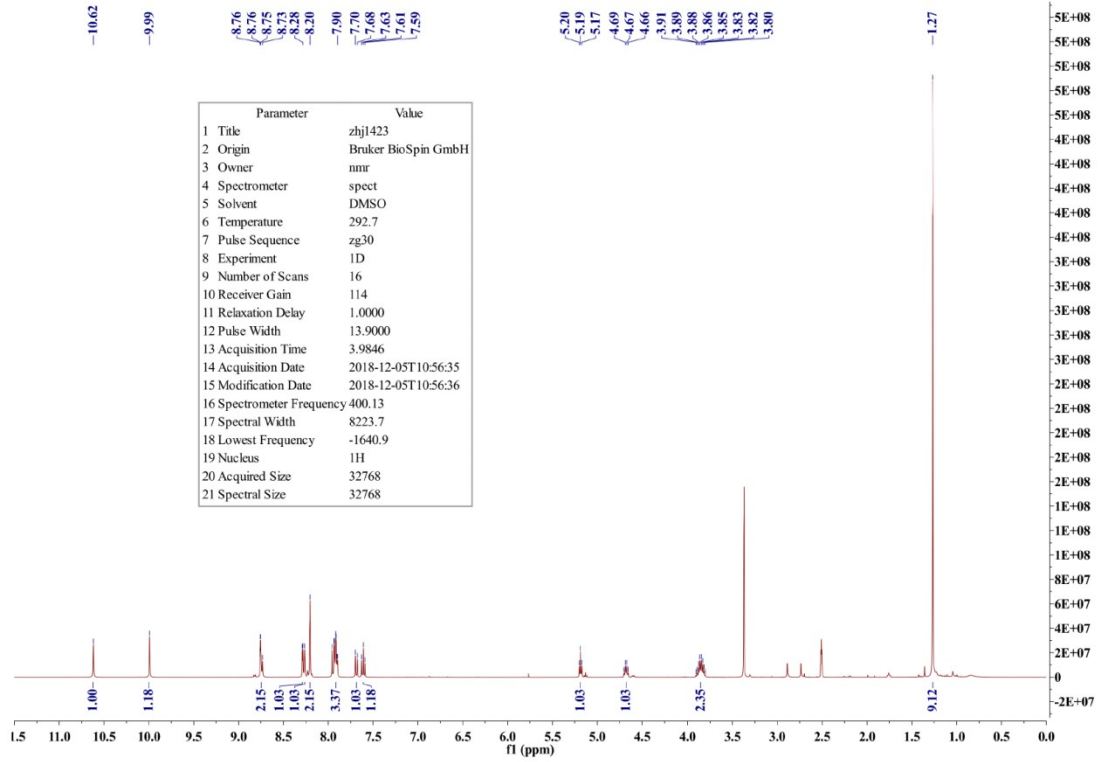

| Parameter                 | Value               |
|---------------------------|---------------------|
| 1 Title                   | zhj1423             |
| 2 Origin                  | Bruker BioSpin GmbH |
| 3 Owner                   | nmr                 |
| 4 Spectrometer            | spect               |
| 5 Solvent                 | DMSO                |
| 6 Temperature             | 292.7               |
| 7 Pulse Sequence          | zg30                |
| 8 Experiment              | 1D                  |
| 9 Number of Scans         | 16                  |
| 10 Receiver Gain          | 114                 |
| 11 Relaxation Delay       | 1.0000              |
| 12 Pulse Width            | 13.9000             |
| 13 Acquisition Time       | 3.9846              |
| 14 Acquisition Date       | 2018-12-05T10:56:35 |
| 15 Modification Date      | 2018-12-05T10:56:36 |
| 16 Spectrometer Frequency | 400.13              |
| 17 Spectral Width         | 8223.7              |
| 18 Lowest Frequency       | -1640.9             |
| 19 Nucleus                | 1H                  |
| 20 Acquired Size          | 32768               |
| 21 Spectral Size          | 32768               |

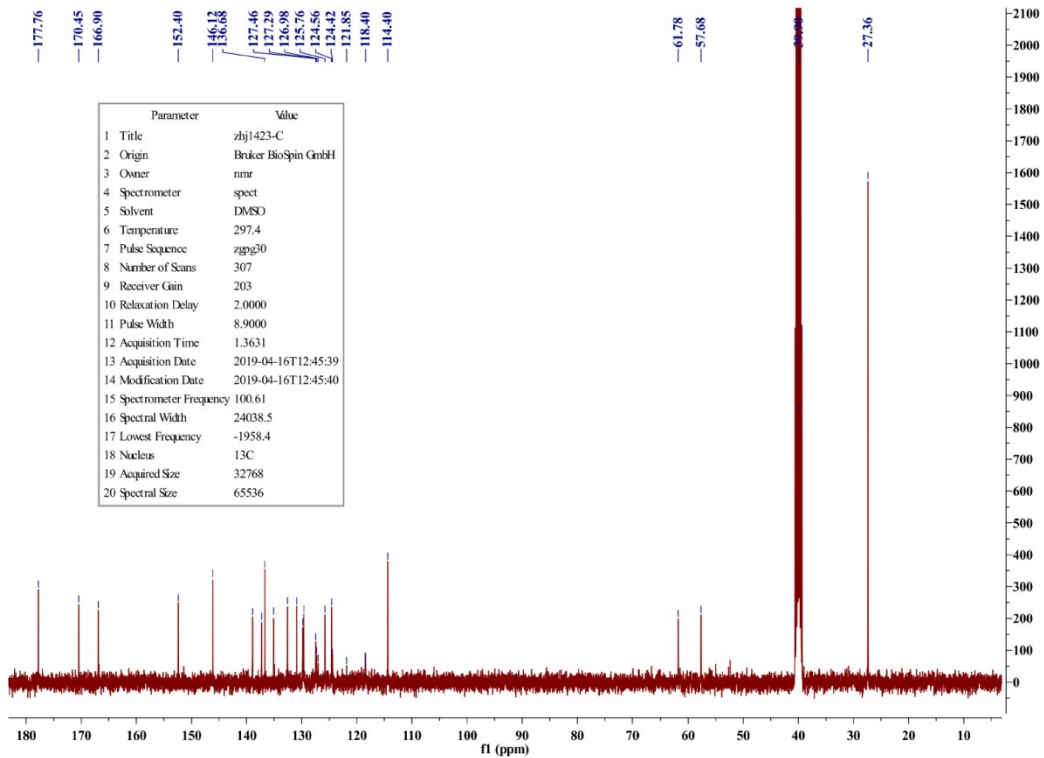

| Parameter                 | Value               |
|---------------------------|---------------------|
| 1 Title                   | zhj1423-C           |
| 2 Origin                  | Bruker BioSpin GmbH |
| 3 Owner                   | nmr                 |
| 4 Spectrometer            | spect               |
| 5 Solvent                 | DMSO                |
| 6 Temperature             | 297.4               |
| 7 Pulse Sequence          | zgpg30              |
| 8 Number of Scans         | 307                 |
| 9 Receiver Gain           | 203                 |
| 10 Relaxation Delay       | 2.0000              |
| 11 Pulse Width            | 8.9000              |
| 12 Acquisition Time       | 1.3631              |
| 13 Acquisition Date       | 2019-04-16T12:45:39 |
| 14 Modification Date      | 2019-04-16T12:45:40 |
| 15 Spectrometer Frequency | 100.61              |
| 16 Spectral Width         | 24038.5             |
| 17 Lowest Frequency       | -1958.4             |
| 18 Nucleus                | 13C                 |
| 19 Acquired Size          | 32768               |
| 20 Spectral Size          | 65536               |



(S)-3-(6-aminopyridin-3-yl)-N-(1-((4-chloro-3-(trifluoromethyl)phenyl)amino)-3-hydroxy-1-oxopropan-2-yl)benzamide (SR12)

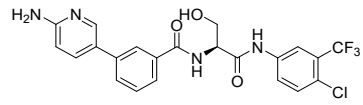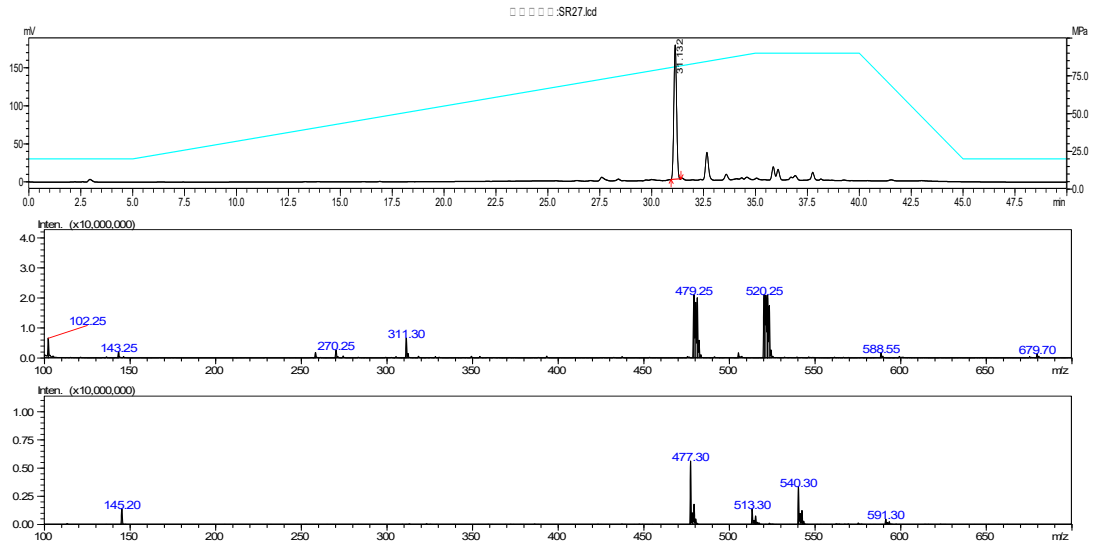

Item name: L7  
Item description:

Channel name: 2: Average Time 0.1632 min : TOF MSe (50-2000) 6eV ESI+ : Combined

1.94e7

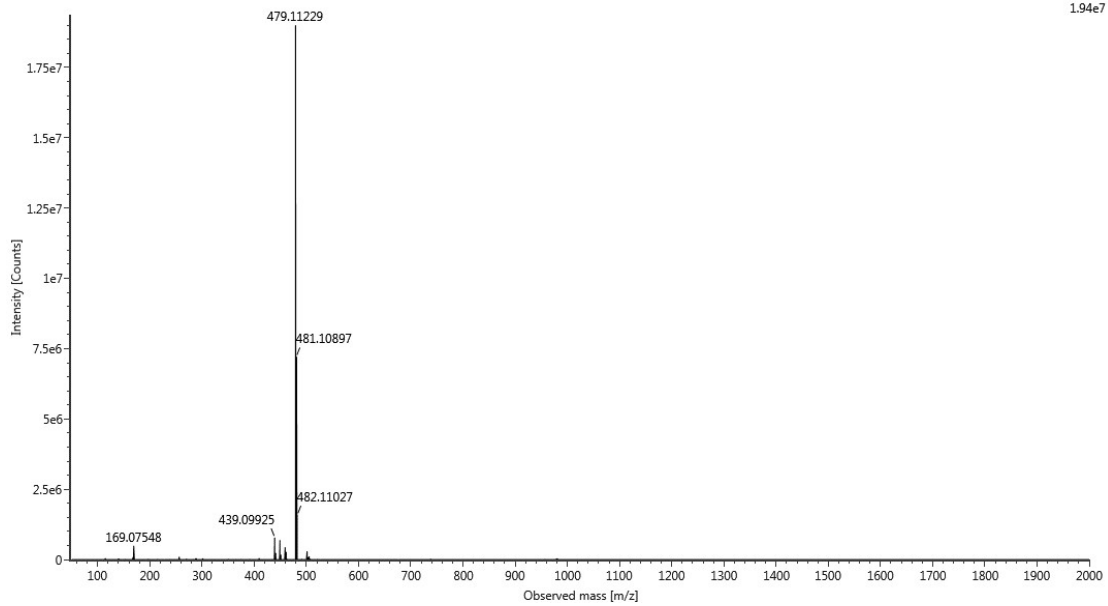

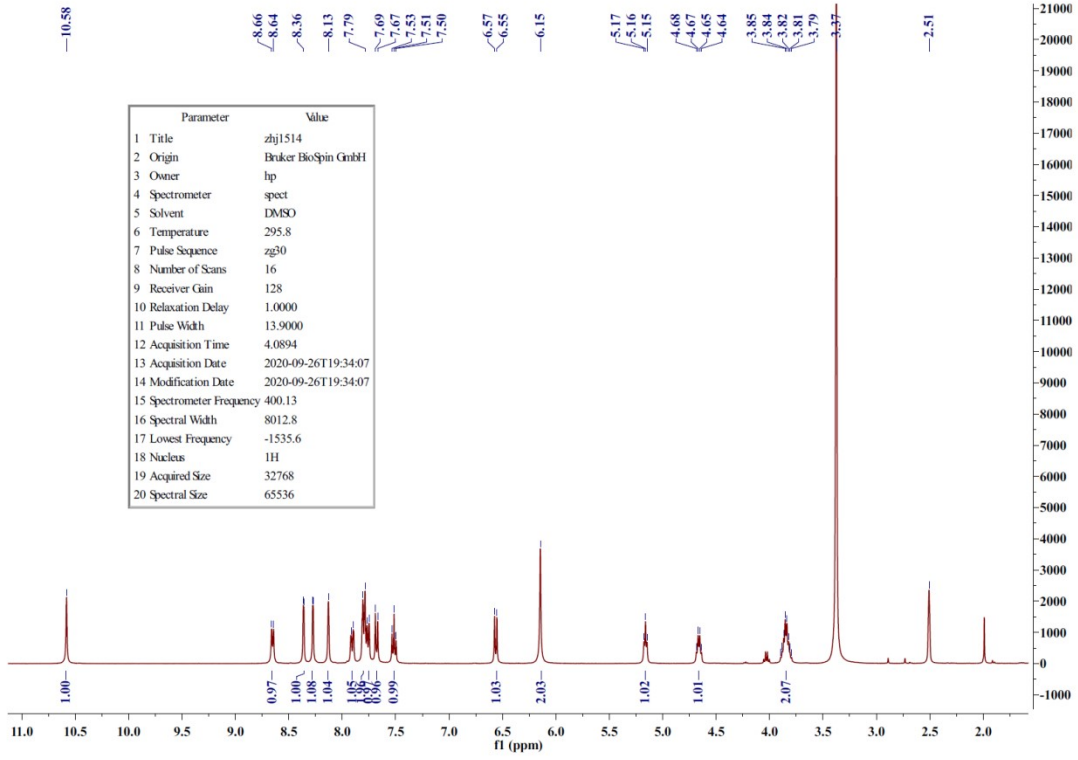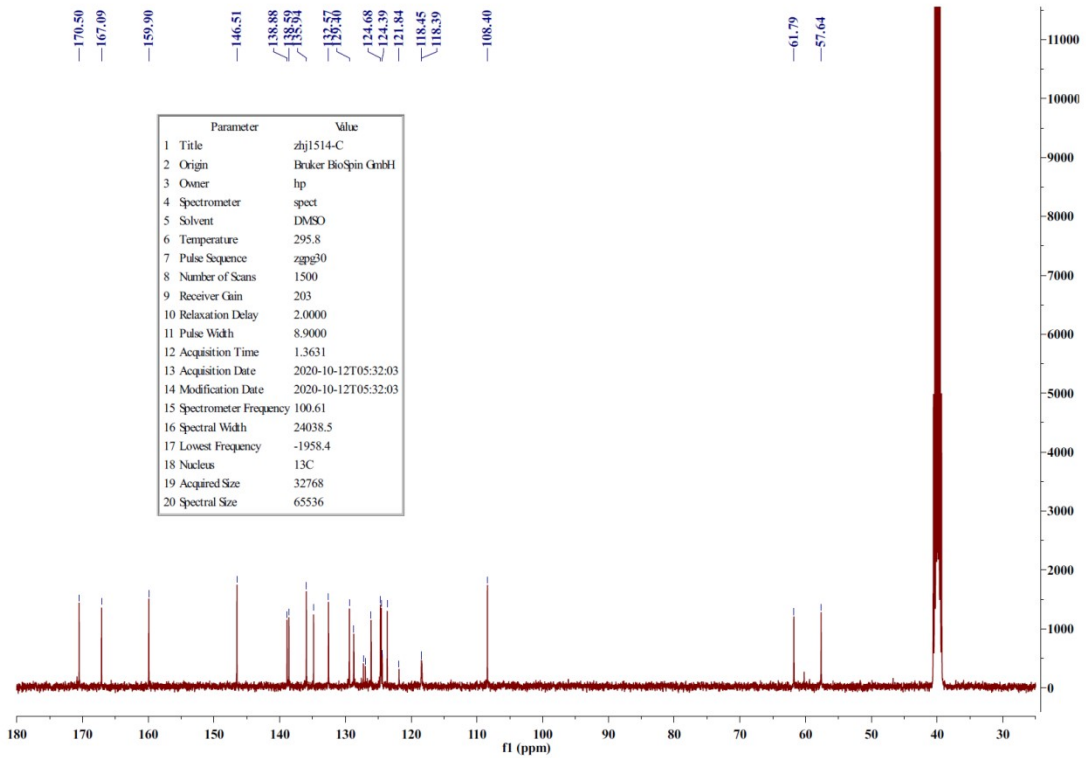

Supplement: d4md00417e1.pdf [file d4md00417e1.pdf]
